# Supplementary material for: Iodine(iii)-promoted oxidative carbotrifluoromethylation of maleimides with imidazopyridines and Langlois’ reagent
Source: Royal Society of Chemistry journal article supplement (doi:10.1039/d3cc05889a), 2024-01-01
Supplement: d3cc05889a1.pdf [file d3cc05889a1.pdf]

**Electronic Supporting Information**

**Iodine(III)-Promoted Oxidative  
Carbotrifluoromethylation of Maleimides with  
Imidazopyridines and Langlois' Reagent**

Dipti Lai,<sup>a,b</sup> Suvam Bhattacharjee,<sup>a</sup> Saurodeep Mandal,<sup>a</sup> Sumit Ghosh,<sup>a,b</sup>  
Prithidipa Sahoo,<sup>a</sup> Subrata Sinha<sup>b</sup> and Alakananda Hajra\*<sup>a</sup>

<sup>a</sup>Department of Chemistry, Visva-Bharati (A Central University), Santiniketan 731235, India

Email: [alakananda.hajra@visva-bharati.ac.in](mailto:alakananda.hajra@visva-bharati.ac.in)

<sup>b</sup>ISERC, Visva-Bharati (A Central University), Santiniketan 731235, India

## Contents

| Sl. No. | Topics                                                                                                    | Page No. |
|---------|-----------------------------------------------------------------------------------------------------------|----------|
| 1       | General information:                                                                                      | S3       |
| 2       | Structure determination (X-ray crystallographic data for <b>3ba</b> ):                                    | S3-S5    |
| 3       | General experimental procedure for the synthesis of <b>3aa-3bh</b> :                                      | S5       |
| 4       | Gram scale synthesis of compound <b>3ba</b> :                                                             | S6       |
| 5       | Characterization data of the synthesized compounds ( <b>3aa-3bh</b> ):                                    | S7-S18   |
| 6       | Control Experiments:                                                                                      | S18      |
| 7       | GC-MS spectra of radical-adduct <b>4</b> :                                                                | S19      |
| 8       | Computational Studies:                                                                                    | S20-S41  |
| 9       | References:                                                                                               | S42      |
| 10      | NMR spectra [ $^1\text{H}$ , $^{13}\text{C}\{^1\text{H}\}$ and $^{19}\text{F}$ ] of synthesized products: | S43-S112 |

## 1. General information:

All reagents were purchased from commercial sources and used without further purification.  $^1\text{H}$  NMR spectra were determined on a 400 MHz spectrometer as solutions in  $\text{CDCl}_3$ . Chemical shifts are expressed in parts per million ( $\delta$ ) and the signals were reported as s (singlet), d (doublet), t (triplet), q (quartet), m (multiplet) and coupling constants ( $J$ ) were given in Hz.  $^{13}\text{C}\{^1\text{H}\}$  NMR and  $^{19}\text{F}$  NMR spectra were recorded at 100 MHz and at 376 MHz in  $\text{CDCl}_3$  solution respectively. Chemical shifts are referenced to  $\text{CDCl}_3$  ( $\delta = 7.26$  for  $^1\text{H}$  and  $\delta = 77.16$  for  $^{13}\text{C}\{^1\text{H}\}$  NMR) as internal standard. TLC was done on a silica gel-coated glass slide. All solvents were dried and distilled before use. Commercially available solvents were freshly distilled before the reaction. Melting points (M.p.) were determined after the recrystallization of solid compounds from a solution of dichloromethane/petroleum ether (1:3). The crystallographic data for the compound **3ba** was collected by SCXRD-BRUKER D8QUEST and the crystal data was solved by APEX4 software.

**Starting Materials:** All the imidazopyridines (**1**)<sup>1</sup> and *N*-alkyl/aryl maleimides (**2**)<sup>2</sup> were prepared by previously reported methods.

## 2. Structure determination (X-ray crystallographic data for **3ba**):

The brown block shaped crystal of **3ba** was obtained by crystallization from a solution in dichloromethane/petroleum ether after purification by column chromatography. The chemical formula of compound **3ba**:  $\text{C}_{25}\text{H}_{16}\text{F}_3\text{N}_3\text{O}_2$ .

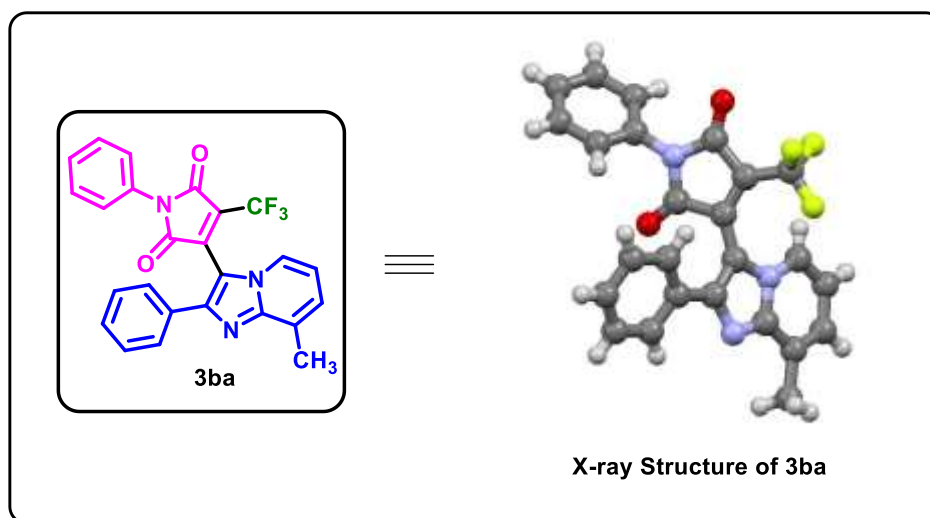

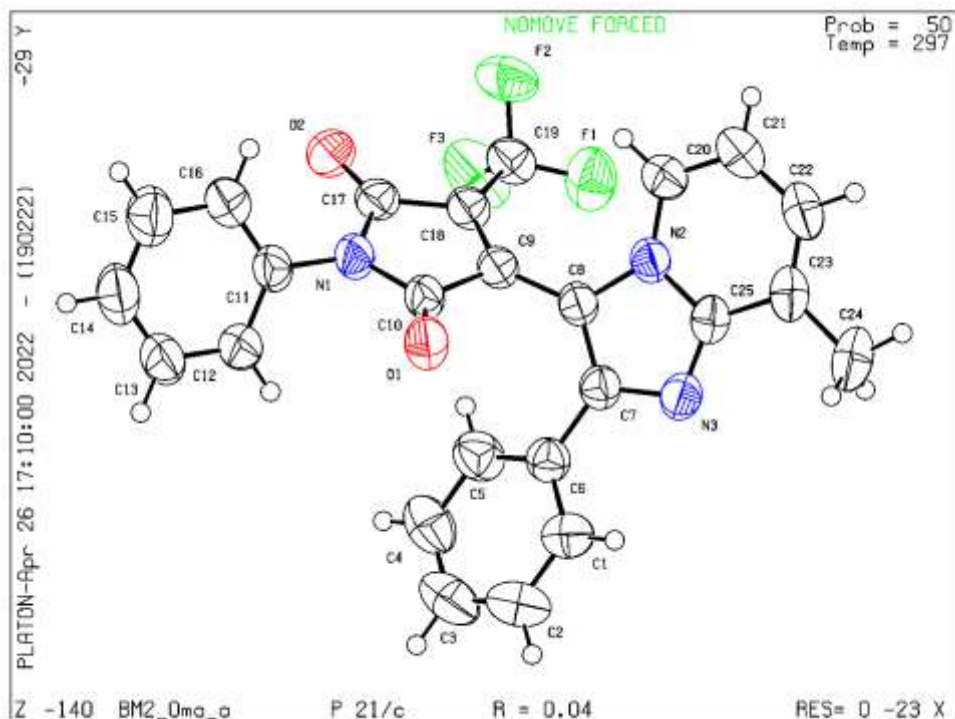

View of ORTEP diagram for the crystal structure of the compound **3-(8-Methyl-2-phenylimidazo[1,2-*a*]pyridin-3-yl)-1-phenyl-4-(trifluoromethyl)-1*H*-pyrrole-2,5-dione (3ba)** (Thermal ellipsoid contour at 50% probability level).

|                             |                                                                              |                 |
|-----------------------------|------------------------------------------------------------------------------|-----------------|
| <b>Wavelength</b>           | 0.71073 Å                                                                    |                 |
| <b>Formula</b>              | C <sub>25</sub> H <sub>16</sub> F <sub>3</sub> N <sub>3</sub> O <sub>2</sub> |                 |
| <b>Crystal system</b>       | Monoclinic                                                                   |                 |
| <b>Space group</b>          | P 2 <sub>1</sub> /c                                                          |                 |
| <b>Unit cell dimensions</b> | a = 11.571(4) Å                                                              | α = 90°         |
|                             | b = 21.464(8) Å                                                              | β = 107.385(9)° |
|                             | c = 8.872(3) Å                                                               | γ = 90°         |
| <b>Volume</b>               | 2102.8 Å <sup>3</sup>                                                        |                 |
| <b>Z</b>                    | 4                                                                            |                 |

|                     |     |
|---------------------|-----|
| <b>R-factor (%)</b> | 4.1 |
|---------------------|-----|

The crystallographic data have been deposited with the Cambridge Crystallographic Data Centre as a supplementary publication with a CCDC reference number CCDC 2232229.

### 3. General experimental procedure for the synthesis of 3aa-3bh:

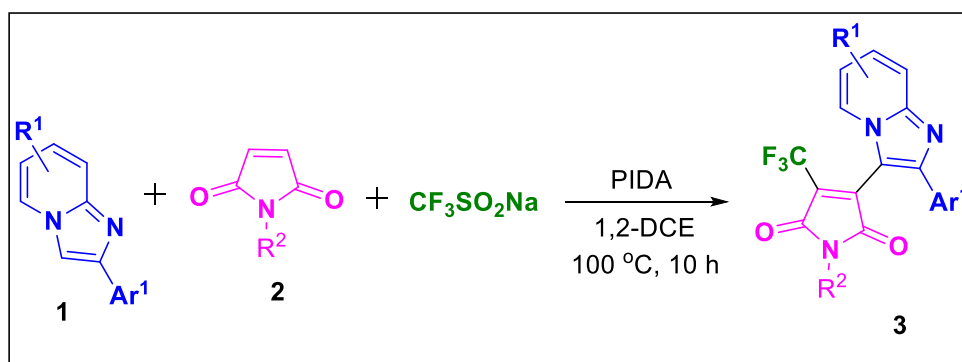

A mixture of 2-arylimidazo[1,2-*a*]pyridine (0.2 mmol) (**1**), *N*-aryl/alkyl maleimide (0.2 mmol) (**2**),  $CF_3SO_2Na$  (0.2 mmol, 31.2 mg) and PIDA (0.4 mmol, 128.8 mg) were taken in an oven-dried screw tube. Solvent 1,2-DCE (2 ml) was then added to the screw tube and the resultant mixture was stirred at 100 °C for 10 h. Progress of the reaction was monitored by TLC in regular intervals. After completion, the reaction mixture was allowed to cool to room temperature and then extracted with DCM (10 mL). The organic phase was dried over anhydrous  $Na_2SO_4$  and concentrated under reduced pressure to get the crude residue which was further purified by column chromatography using silica gel (100–200 mesh) and using mixture of petroleum ether and ethyl acetate as an eluent to afford the corresponding products **3**.

#### 4. Gram scale synthesis of compound **3ba**:

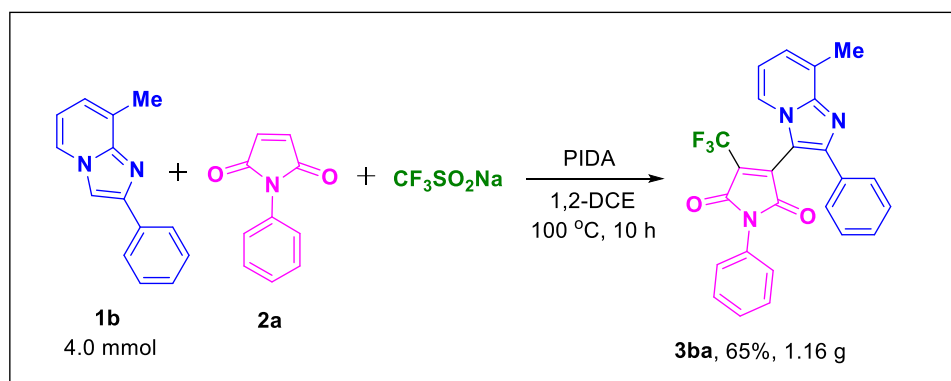

A mixture of 8-methyl-2-phenylimidazo[1,2-*a*]pyridine (4.0 mmol, 0.83 g) (**1b**), *N*-phenyl maleimide (4.0 mmol, 0.69 g) (**2a**), CF<sub>3</sub>SO<sub>2</sub>Na (4.0 mmol, 0.62 g) and PIDA (8.0 mmol, 2.57 g) were taken in an oven-dried round bottom flask. Then, 1,2-DCE (40 ml) was added to it and the resultant mixture was then stirred at 100 °C for 10 h. The progress of the reaction was monitored by TLC. After completion, the reaction mixture was allowed to cool to room temperature and then extracted with DCM (50 mL). The organic phase was dried over anhydrous Na<sub>2</sub>SO<sub>4</sub> and concentrated under reduced pressure to get the crude residue which was further purified by column chromatography using silica gel (100–200 mesh) and using a mixture of petroleum ether and ethyl acetate (93:07) as an eluent to afford the corresponding product **3ba** (65%, 1.16 g) as a red solid.

## 5. Characterization data of the synthesized compounds (3aa-3bh):

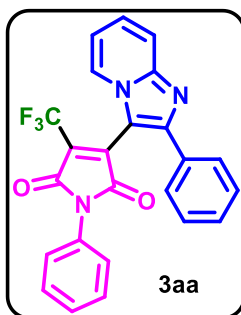

**1-Phenyl-3-(2-phenylimidazo[1,2-*a*]pyridin-3-yl)-4-(trifluoromethyl)-1*H*-pyrrole-2,5-dione (3aa):** Red solid (57.2 mg, 66%); M.p. 110–111 °C;  $R_f = 0.50$  (PE : EA = 80 : 20);  $^1\text{H}$  NMR ( $\text{CDCl}_3$ , 400 MHz):  $\delta$  8.07 (d,  $J = 7.2$  Hz, 1H), 7.78 (d,  $J = 8.8$  Hz, 1H), 7.66–7.63 (m, 2H), 7.47–7.42 (m, 5H), 7.41–7.37 (m, 2H), 7.35–7.33 (m, 2H), 7.02–6.98 (m, 1H);  $^{13}\text{C}\{^1\text{H}\}$  NMR ( $\text{CDCl}_3$ , 100 MHz):  $\delta$  165.5, 164.3, 152.6, 148.7, 134.8, 133.6, 130.7, 129.8, 129.4, 129.0, 128.7, 128.6, 128.1, 126.4, 125.9, 125.5, 120.1 (q,  $J_{\text{C-F}} = 275.0$  Hz), 118.4, 114.0, 108.1;  $^{19}\text{F}$  NMR ( $\text{CDCl}_3$ , 376 MHz):  $\delta$  -61.52; HRMS (ESI-TOF)  $m/z$ :  $[\text{M} + \text{H}]^+$  Calcd for  $[\text{C}_{24}\text{H}_{15}\text{F}_3\text{N}_3\text{O}_2]^+$ : 434.1111; found: 434.1109.

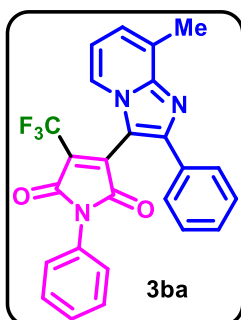

**3-(8-Methyl-2-phenylimidazo[1,2-*a*]pyridin-3-yl)-1-phenyl-4-(trifluoromethyl)-1*H*-pyrrole-2,5-dione (3ba):** Red solid (65.3 mg, 73%); M.p. 190–191 °C;  $R_f = 0.50$  (PE : EA = 90 : 10);  $^1\text{H}$  NMR ( $\text{CDCl}_3$ , 400 MHz):  $\delta$  7.94 (d,  $J = 6.8$  Hz, 1H), 7.66–7.64 (m, 2H), 7.48–7.43 (m, 5H), 7.40–7.36 (m, 1H), 7.33–7.31 (m, 2H), 7.21 (d,  $J = 6.8$  Hz, 1H), 6.91 (t,  $J = 7.2$  Hz, 1H), 2.71 (s, 3H);  $^{13}\text{C}\{^1\text{H}\}$  NMR ( $\text{CDCl}_3$ , 100 MHz):  $\delta$  165.5, 164.3, 152.1, 149.1, 135.0, 134.9, 133.8, 130.7, 129.4, 129.2, 128.9, 128.8, 128.6, 126.9, 125.9, 123.7, 123.3, 120.1 (q,  $J_{\text{C-F}} = 270.0$  Hz), 114.0, 108.6, 17.2;  $^{19}\text{F}$  NMR ( $\text{CDCl}_3$ , 376 MHz):  $\delta$  -61.43; HRMS (ESI-TOF)  $m/z$ :  $[\text{M} + \text{H}]^+$  Calcd for  $[\text{C}_{25}\text{H}_{17}\text{F}_3\text{N}_3\text{O}_2]^+$ : 448.1267; found: 448.1287.

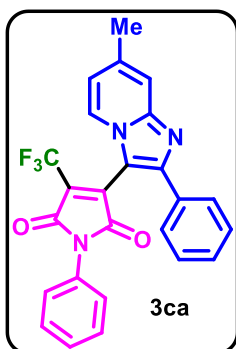

**3-(7-Methyl-2-phenylimidazo[1,2-*a*]pyridin-3-yl)-1-phenyl-4-(trifluoromethyl)-1*H*-pyrrole-2,5-dione (3ca):** Red solid (66.2 mg, 74%); M.p. 188-189 °C;  $R_f = 0.55$  (PE : EA = 75 : 25);  $^1\text{H}$  NMR ( $\text{CDCl}_3$ , 400 MHz):  $\delta$  7.96 (d,  $J = 7.2$  Hz, 1H), 7.64-7.62 (m, 2H), 7.52 (s, 1H), 7.48-7.41 (m, 5H), 7.40-7.36 (m, 1H), 7.34-7.32 (m, 2H), 6.84-6.82 (m, 1H), 2.48 (s, 3H);  $^{13}\text{C}\{^1\text{H}\}$  NMR ( $\text{CDCl}_3$ , 100 MHz):  $\delta$  165.6, 164.4, 153.0, 149.2, 139.9, 134.7, 133.8, 132.3, 130.7, 129.4, 129.3, 128.9, 128.7, 128.6, 125.9, 124.8, 120.2 (q,  $J_{\text{C-F}} = 272.0$  Hz), 116.8, 116.6, 107.9, 21.6;  $^{19}\text{F}$  NMR ( $\text{CDCl}_3$ , 376 MHz):  $\delta$  -61.30; HRMS (ESI-TOF)  $m/z$ :  $[\text{M} + \text{H}]^+$  Calcd for  $[\text{C}_{25}\text{H}_{17}\text{F}_3\text{N}_3\text{O}_2]^+$ : 448.1267; found: 448.1275.

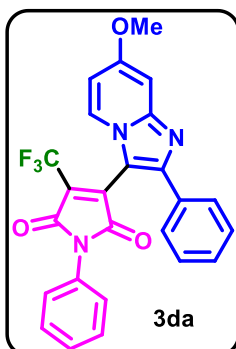

**3-(7-Methoxy-2-phenylimidazo[1,2-*a*]pyridin-3-yl)-1-phenyl-4-(trifluoromethyl)-1*H*-pyrrole-2,5-dione (3da):** Purple solid (70.4 mg, 76%); M.p. 190-191 °C;  $R_f = 0.45$  (PE : EA = 70 : 30);  $^1\text{H}$  NMR ( $\text{CDCl}_3$ , 400 MHz):  $\delta$  7.90 (d,  $J = 7.6$  Hz, 1H), 7.63-7.61 (m, 2H), 7.47-7.37 (m, 6H), 7.32 (d,  $J = 7.6$  Hz, 2H), 7.03 (d,  $J = 2.4$  Hz, 1H), 6.70-6.68 (m, 1H), 3.93 (s, 3H);  $^{13}\text{C}\{^1\text{H}\}$  NMR ( $\text{CDCl}_3$ , 100 MHz):  $\delta$  165.7, 164.5, 160.4, 153.6, 150.8, 134.4, 133.8, 130.7, 129.38, 129.36, 128.9, 128.7, 128.5, 126.2, 125.9, 121.9, 120.3 (q,  $J_{\text{C-F}} = 272.0$  Hz), 108.7, 107.6, 95.7, 56.0;  $^{19}\text{F}$  NMR ( $\text{CDCl}_3$ , 376 MHz):  $\delta$  -61.09; HRMS (ESI-TOF)  $m/z$ :  $[\text{M} + \text{H}]^+$  Calcd for  $[\text{C}_{25}\text{H}_{17}\text{F}_3\text{N}_3\text{O}_3]^+$ : 464.1217; found: 464.1221.



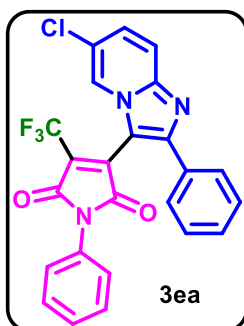

**3-(6-Chloro-2-phenylimidazo[1,2-*a*]pyridin-3-yl)-1-phenyl-4-(trifluoromethyl)-1*H*-pyrrole-2,5-dione (3ea):** Red solid (59.8 mg, 64%); M.p. 184-185 °C;  $R_f = 0.50$  (PE : EA = 80 : 20);  $^1\text{H}$  NMR ( $\text{CDCl}_3$ , 400 MHz):  $\delta$  8.10 (s, 1H), 7.70 (d,  $J = 9.6$  Hz, 1H), 7.63-7.61 (m, 2H), 7.49-7.41 (m, 6H), 7.39-7.34 (m, 3H);  $^{13}\text{C}\{^1\text{H}\}$  NMR ( $\text{CDCl}_3$ , 100 MHz):  $\delta$  165.3, 164.0, 152.8, 146.8, 138.1, 134.3, 133.1, 130.5, 129.6, 129.4, 129.3, 129.0, 128.7, 128.6, 125.9, 123.4, 122.3, 119.8 (q,  $J_{\text{C-F}} = 274.0$  Hz), 114.6, 108.2;  $^{19}\text{F}$  NMR ( $\text{CDCl}_3$ , 376 MHz):  $\delta$  -61.77; HRMS (ESI-TOF)  $m/z$ :  $[\text{M} + \text{H}]^+$  Calcd for  $[\text{C}_{24}\text{H}_{14}^{35}\text{ClF}_3\text{N}_3\text{O}_2]^+$ : 468.0721; found: 468.0705.

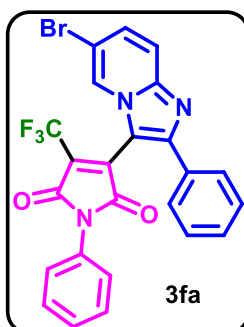

**3-(6-Bromo-2-phenylimidazo[1,2-*a*]pyridin-3-yl)-1-phenyl-4-(trifluoromethyl)-1*H*-pyrrole-2,5-dione (3fa):** Red solid (66.5 mg, 65%); M.p. 180-181 °C;  $R_f = 0.50$  (PE : EA = 78 : 22);  $^1\text{H}$  NMR ( $\text{CDCl}_3$ , 400 MHz):  $\delta$  8.19 (s, 1H), 7.67-7.61 (m, 3H), 7.49-7.44 (m, 6H), 7.40-7.34 (m, 3H);  $^{13}\text{C}\{^1\text{H}\}$  NMR ( $\text{CDCl}_3$ , 100 MHz):  $\delta$  165.3, 164.0, 152.6, 148.6, 146.9, 134.3, 133.0, 131.4, 130.5, 129.6, 129.4, 129.0, 128.7, 128.6, 125.9, 125.6, 119.8 (q,  $J_{\text{C-F}} = 272.0$  Hz), 118.8, 108.7, 108.0;  $^{19}\text{F}$  NMR ( $\text{CDCl}_3$ , 376 MHz):  $\delta$  -61.77; HRMS (ESI-TOF)  $m/z$ :  $[\text{M} + \text{H}]^+$  Calcd for  $[\text{C}_{24}\text{H}_{14}^{79}\text{BrF}_3\text{N}_3\text{O}_2]^+$ : 512.0216; found: 512.0202.

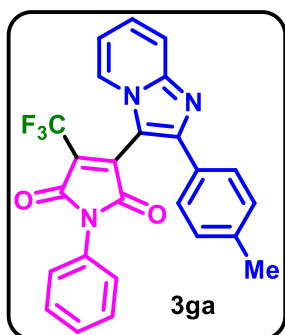

**1-Phenyl-3-(2-(*p*-tolyl)imidazo[1,2-*a*]pyridin-3-yl)-4-(trifluoromethyl)-1*H*-pyrrole-2,5-dione (3ga):** Red solid (62.6 mg, 70%); M.p. 190-191 °C;  $R_f = 0.50$  (PE : EA = 75 : 25);  $^1\text{H}$  NMR ( $\text{CDCl}_3$ , 400 MHz):  $\delta$  8.06 (d,  $J = 7.2$  Hz, 1H), 7.76 (d,  $J = 8.8$  Hz, 1H), 7.54 (d,  $J = 8.0$  Hz, 2H), 7.49-7.44 (m, 2H), 7.42-7.39 (m, 1H), 7.37-7.33 (m, 2H), 7.27-7.25 (m, 3H), 6.99 (t,  $J = 7.2$  Hz, 1H), 2.40 (s, 3H);  $^{13}\text{C}\{^1\text{H}\}$  NMR ( $\text{CDCl}_3$ , 100 MHz):  $\delta$  165.4, 164.2, 152.6, 148.6, 139.3, 134.87, 134.84, 130.6, 129.6, 129.2, 128.5, 127.9, 125.8, 125.7, 125.3, 123.8, 120.0 (q,  $J_{\text{C-F}} = 277.0$  Hz), 118.1, 113.8, 107.7, 21.4;  $^{19}\text{F}$  NMR ( $\text{CDCl}_3$ , 376 MHz):  $\delta$  -61.45; HRMS (ESI-TOF)  $m/z$ :  $[\text{M} + \text{H}]^+$  Calcd for  $[\text{C}_{25}\text{H}_{17}\text{F}_3\text{N}_3\text{O}_2]^+$ : 448.1267; found: 448.1257.

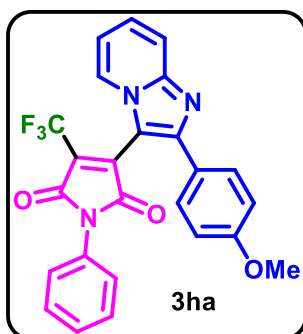

**3-(2-(4-Methoxyphenyl)imidazo[1,2-*a*]pyridin-3-yl)-1-phenyl-4-(trifluoromethyl)-1*H*-pyrrole-2,5-dione (3ha):** Red solid (66.7 mg, 72%); M.p. 128-129 °C;  $R_f = 0.45$  (PE : EA = 70 : 30);  $^1\text{H}$  NMR ( $\text{CDCl}_3$ , 400 MHz):  $\delta$  8.05 (d,  $J = 6.8$  Hz, 1H), 7.75 (d,  $J = 9.2$  Hz, 1H), 7.59 (d,  $J = 8.8$  Hz, 2H), 7.48-7.33 (m, 6H), 7.00-6.96 (m, 3H), 3.85 (s, 3H);  $^{13}\text{C}\{^1\text{H}\}$  NMR ( $\text{CDCl}_3$ , 100 MHz):  $\delta$  165.5, 164.3, 160.6, 152.5, 148.7, 134.9, 130.7, 130.1, 129.4, 128.6, 128.5, 128.1, 126.1, 125.9, 125.4, 120.2 (q,  $J_{\text{C-F}} = 271.0$  Hz), 118.1, 114.5, 113.8, 107.7, 55.4;  $^{19}\text{F}$  NMR ( $\text{CDCl}_3$ , 376 MHz):  $\delta$  -61.38; HRMS (ESI-TOF)  $m/z$ :  $[\text{M} + \text{H}]^+$  Calcd for  $[\text{C}_{25}\text{H}_{17}\text{F}_3\text{N}_3\text{O}_3]^+$ : 464.1217; found: 464.1210.

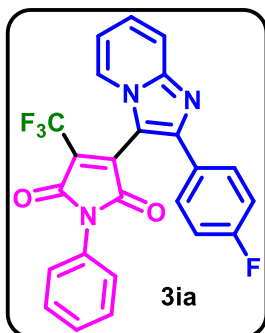

**3-(2-(4-Fluorophenyl)imidazo[1,2-*a*]pyridin-3-yl)-1-phenyl-4-(trifluoromethyl)-1*H*-pyrrole-2,5-dione (3ia):** Red solid (47.8 mg, 53%); M.p. 155-156 °C;  $R_f = 0.50$  (PE : EA = 80 : 20);  $^1\text{H NMR}$  ( $\text{CDCl}_3$ , 400 MHz):  $\delta$  8.07 (d,  $J = 6.8$  Hz, 1H), 7.77 (d,  $J = 9.2$  Hz, 1H), 7.64-7.61 (m, 2H), 7.48-7.45 (m, 2H), 7.43-7.38 (m, 2H), 7.35-7.33 (m, 2H), 7.16 (t,  $J = 8.8$  Hz, 2H), 7.02 (t,  $J = 7.2$  Hz, 1H);  $^{13}\text{C}\{^1\text{H}\}$  NMR ( $\text{CDCl}_3$ , 100 MHz):  $\delta$  165.4, 164.2, 163.5 (d,  $J_{\text{C-F}} = 248$  Hz), 151.5, 148.6, 134.4, 130.5 (d,  $J_{\text{C-F}} = 9\text{Hz}$ ), 129.7, 129.4, 128.7, 128.4, 126.4 (d,  $J_{\text{C-F}} = 23$  Hz), 125.9, 125.5, 120.0 (q,  $J_{\text{C-F}} = 275$  Hz), 118.2, 116.2, 116.0, 114.2, 107.9;  $^{19}\text{F NMR}$  ( $\text{CDCl}_3$ , 376 MHz):  $\delta$  -61.51, -111.50; HRMS (ESI-TOF)  $m/z$ :  $[\text{M} + \text{H}]^+$  Calcd for  $[\text{C}_{24}\text{H}_{14}\text{F}_4\text{N}_3\text{O}_2]^+$ : 452.1017; found: 452.1012.

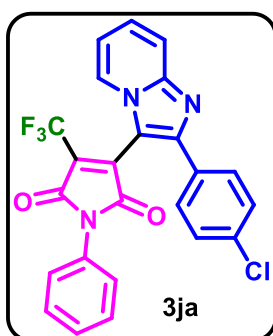

**3-(2-(4-Chlorophenyl)imidazo[1,2-*a*]pyridin-3-yl)-1-phenyl-4-(trifluoromethyl)-1*H*-pyrrole-2,5-dione (3ja):** Red solid (62.6 mg, 67%); M.p. 135-136 °C;  $R_f = 0.50$  (PE : EA = 80 : 20);  $^1\text{H NMR}$  ( $\text{CDCl}_3$ , 400 MHz):  $\delta$  8.06 (d,  $J = 4.8$  Hz, 1H), 7.78 (d,  $J = 8.0$  Hz, 1H), 7.59 (d,  $J = 8.0$  Hz, 2H), 7.50-7.43 (m, 6H), 7.34 (d,  $J = 7.6$  Hz, 2H), 7.03-7.00 (m, 1H);  $^{13}\text{C}\{^1\text{H}\}$  NMR ( $\text{CDCl}_3$ , 100 MHz):  $\delta$  165.4, 164.1, 151.1, 148.6, 135.6, 134.5, 132.1, 130.6, 129.9, 129.4, 129.3, 128.7, 128.4, 125.9, 125.5, 124.9, 120.0 (q,  $J_{\text{C-F}} = 275.0$  Hz), 118.4, 114.3, 108.0;  $^{19}\text{F NMR}$  ( $\text{CDCl}_3$ , 376 MHz):  $\delta$  -61.46; HRMS (ESI-TOF)  $m/z$ :  $[\text{M} + \text{H}]^+$  Calcd for  $[\text{C}_{24}\text{H}_{14}^{35}\text{ClF}_3\text{N}_3\text{O}_2]^+$ : 468.0721; found: 468.0717.

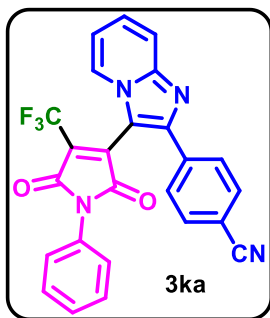

**4-(3-(2,5-Dioxo-1-phenyl-4-(trifluoromethyl)-2,5-dihydro-1H-pyrrol-3-yl)imidazo[1,2-*a*]pyridin-2-yl)benzonitrile (3ka):** Yellow solid (56.8 mg, 62%); M.p. 180-181 °C;  $R_f = 0.45$  (PE : EA = 75 : 25);  $^1\text{H}$  NMR ( $\text{CDCl}_3$ , 400 MHz):  $\delta$  8.08 (d,  $J = 6.8$  Hz, 1H), 7.80-7.72 (m, 5H), 7.50-7.46 (m, 3H), 7.42-7.38 (m, 1H), 7.33 (d,  $J = 7.6$  Hz, 2H), 7.05 (t,  $J = 7.2$  Hz, 1H);  $^{13}\text{C}\{^1\text{H}\}$  NMR ( $\text{CDCl}_3$ , 100 MHz):  $\delta$  165.3, 163.9, 150.0, 148.6, 138.1, 133.9, 132.6, 130.4, 129.5, 129.2, 128.8, 128.6, 125.8, 125.5, 125.3, 124.9, 119.9 (q,  $J_{\text{C-F}} = 272.0$  Hz), 118.5, 114.6, 112.7, 108.5;  $^{19}\text{F}$  NMR (376 MHz,  $\text{CDCl}_3$ ):  $\delta$  -61.52; HRMS (ESI-TOF)  $m/z$ :  $[\text{M} + \text{H}]^+$  Calcd for  $[\text{C}_{25}\text{H}_{14}\text{F}_3\text{N}_4\text{O}_2]^+$ : 459.1063; found: 459.1048.

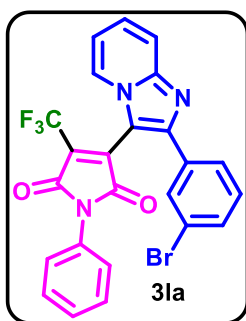

**3-(2-(3-Bromophenyl)imidazo[1,2-*a*]pyridin-3-yl)-1-phenyl-4-(trifluoromethyl)-1H-pyrrole-2,5-dione (3la):** Red solid (59.4 mg, 58%); M.p. 140-141 °C;  $R_f = 0.55$  (PE : EA = 80 : 20);  $^1\text{H}$  NMR ( $\text{CDCl}_3$ , 400 MHz):  $\delta$  8.06 (d,  $J = 7.2$  Hz, 1H), 7.87 (s, 1H), 7.78 (d,  $J = 8.8$  Hz, 1H), 7.56-7.50 (m, 2H), 7.48-7.43 (m, 3H), 7.42-7.38 (m, 1H), 7.36-7.29 (m, 3H), 7.02 (t,  $J = 6.8$  Hz, 1H);  $^{13}\text{C}\{^1\text{H}\}$  NMR ( $\text{CDCl}_3$ , 100 MHz):  $\delta$  165.4, 164.1, 150.5, 148.6, 137.4, 135.5, 134.3, 132.3, 131.6, 130.5, 130.3, 129.4, 128.8, 128.4, 127.2, 126.0, 125.5, 123.1, 122.7 (q,  $J_{\text{C-F}} = 272.0$  Hz), 118.4, 114.3, 108.2;  $^{19}\text{F}$  NMR ( $\text{CDCl}_3$ , 376 MHz):  $\delta$  -61.45; HRMS (ESI-TOF)  $m/z$ :  $[\text{M} + \text{H}]^+$  Calcd for  $[\text{C}_{24}\text{H}_{14}^{79}\text{BrF}_3\text{N}_3\text{O}_2]^+$ : 512.0216; found: 512.0201.

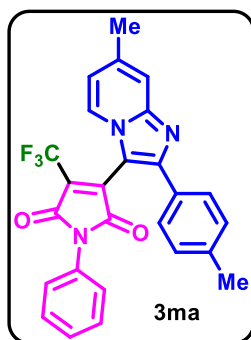

**3-(7-Methyl-2-(*p*-tolyl)imidazo[1,2-*a*]pyridin-3-yl)-1-phenyl-4-(trifluoromethyl)-1*H*-pyrrole-2,5-dione (3ma):** Red solid (71.9 mg, 78%); M.p. 198-199 °C;  $R_f = 0.50$  (PE : EA = 80 : 20);  $^1\text{H}$  NMR ( $\text{CDCl}_3$ , 400 MHz):  $\delta$  7.94 (d,  $J = 7.2$  Hz, 1H), 7.53-7.51 (m, 3H), 7.48-7.44 (m, 2H), 7.39 (d,  $J = 7.2$  Hz, 1H), 7.33 (d,  $J = 7.6$  Hz, 2H), 7.25-7.24 (m, 2H), 6.83-6.81 (m, 1H), 2.47 (s, 3H), 2.39 (s, 3H);  $^{13}\text{C}\{^1\text{H}\}$  NMR ( $\text{CDCl}_3$ , 100 MHz):  $\delta$  165.6, 164.5, 153.1, 149.2, 139.8, 139.4, 134.8, 130.9, 130.8, 129.7, 129.4, 128.6, 128.5, 126.0, 124.7, 122.7, 120.3 (q,  $J_{\text{C-F}} = 273.0$  Hz), 116.7, 116.5, 107.7, 21.6, 21.5;  $^{19}\text{F}$  NMR ( $\text{CDCl}_3$ , 376 MHz):  $\delta$  -61.23; HRMS (ESI-TOF)  $m/z$ :  $[\text{M} + \text{H}]^+$  Calcd for  $[\text{C}_{26}\text{H}_{19}\text{F}_3\text{N}_3\text{O}_2]^+$ : 462.1424; found: 462.1428.

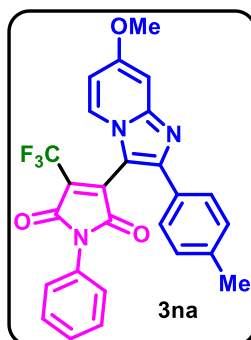

**3-(7-Methoxy-2-(*p*-tolyl)imidazo[1,2-*a*]pyridin-3-yl)-1-phenyl-4-(trifluoromethyl)-1*H*-pyrrole-2,5-dione (3na):** Purple solid (76.3 mg, 80%); M.p. 195-196 °C;  $R_f = 0.45$  (PE : EA = 75 : 25);  $^1\text{H}$  NMR ( $\text{CDCl}_3$ , 400 MHz):  $\delta$  7.85 (d,  $J = 7.6$  Hz, 1H), 7.49 (d,  $J = 7.6$  Hz, 2H), 7.44-7.40 (m, 2H), 7.36-7.29 (m, 3H), 7.22 (d,  $J = 8.0$  Hz, 2H), 6.98-6.97 (m, 1H), 6.65-6.61 (m, 1H), 3.87 (d,  $J = 3.6$  Hz, 3H), 2.36 (s, 3H);  $^{13}\text{C}\{^1\text{H}\}$  NMR ( $\text{CDCl}_3$ , 100 MHz):  $\delta$  165.7, 164.5, 160.3, 153.7, 150.8, 139.4, 134.5, 130.9, 130.7, 129.6, 129.3, 128.55, 128.50, 126.1, 125.9, 123.0 (q,  $J_{\text{C-F}} = 271.0$  Hz), 121.5, 108.5, 107.4, 95.6, 55.9, 21.5;  $^{19}\text{F}$  NMR ( $\text{CDCl}_3$ , 376 MHz):  $\delta$  -60.96; HRMS (ESI-TOF)  $m/z$ :  $[\text{M} + \text{H}]^+$  Calcd for  $[\text{C}_{26}\text{H}_{19}\text{F}_3\text{N}_3\text{O}_3]^+$ : 478.1373; found: 478.1375.

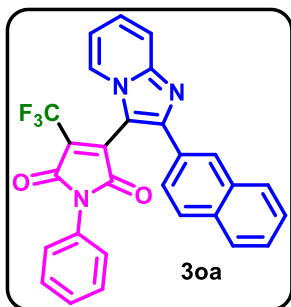

**3-(2-(Naphthalen-2-yl)imidazo[1,2-*a*]pyridin-3-yl)-1-phenyl-4-(trifluoromethyl)-1*H*-pyrrole-2,5-dione (3oa):** Red solid (55.1 mg, 57%); M.p. 215-216 °C;  $R_f = 0.50$  (PE : EA = 70 : 30);  $^1\text{H NMR}$  ( $\text{CDCl}_3$ , 400 MHz):  $\delta$  8.18 (s, 1H), 8.10 (d,  $J = 6.8$  Hz, 1H), 7.94-7.86 (m, 3H), 7.82 (d,  $J = 9.2$  Hz, 1H), 7.75-7.73 (m, 1H), 7.54-7.51 (m, 2H), 7.49-7.45 (m, 1H), 7.43-7.41 (m, 2H), 7.37 (d,  $J = 7.2$  Hz, 1H), 7.28 (d,  $J = 7.6$  Hz, 2H), 7.03 (t,  $J = 7.2$  Hz, 1H);  $^{13}\text{C}\{^1\text{H}\}$  NMR ( $\text{CDCl}_3$ , 100 MHz):  $\delta$  165.4, 164.3, 152.3, 148.7, 134.8, 133.6, 133.4, 131.0, 130.5, 129.4, 128.8, 128.6, 128.5, 128.4, 128.3, 127.9, 126.9, 126.7, 125.94, 125.91, 125.4, 124.1, 120.1 (q,  $J_{\text{C-F}} = 271$  Hz), 118.3, 114.1, 108.3;  $^{19}\text{F NMR}$  ( $\text{CDCl}_3$ , 376 MHz):  $\delta$  -61.33; HRMS (ESI-TOF)  $m/z$ :  $[\text{M} + \text{H}]^+$  Calcd for  $[\text{C}_{28}\text{H}_{17}\text{F}_3\text{N}_3\text{O}_2]^+$ : 484.1267; found: 484.1262.

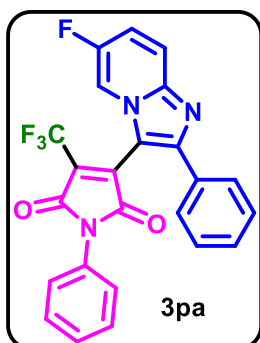

**3-(6-Fluoro-2-phenylimidazo[1,2-*a*]pyridin-3-yl)-1-phenyl-4-(trifluoromethyl)-1*H*-pyrrole-2,5-dione (3pa):** Red solid (49.6 mg, 55%); M.p. 187-188 °C;  $R_f = 0.50$  (PE : EA = 80 : 20);  $^1\text{H NMR}$  ( $\text{CDCl}_3$ , 400 MHz):  $\delta$  8.06 (s, 1H), 7.63 (s, 2H), 7.47-7.36 (m, 10H);  $^{13}\text{C}\{^1\text{H}\}$  NMR ( $\text{CDCl}_3$ , 100 MHz):  $\delta$  165.1, 163.8, 152.8, 151.1, 144.9, 139.3, 136.8, 133.9, 131.7, 130.3, 129.9 (d,  $J_{\text{C-F}} = 10.0$  Hz), 129.4, 129.2, 128.7, 128.5, 128.4 (d,  $J_{\text{C-F}} = 7.0$  Hz), 126.0, 122.4 (q,  $J_{\text{C-F}} = 277.0$  Hz), 113.4 (d,  $J_{\text{C-F}} = 34.0$  Hz), 109.0;  $^{19}\text{F NMR}$  ( $\text{CDCl}_3$ , 376 MHz):  $\delta$  -61.68, -136.31; HRMS (ESI-TOF)  $m/z$ :  $[\text{M} + \text{H}]^+$  Calcd for  $[\text{C}_{24}\text{H}_{14}\text{F}_4\text{N}_3\text{O}_2]^+$ : 452.1017; found: 452.1011.

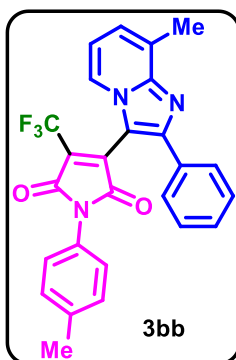

**3-(8-Methyl-2-phenylimidazo[1,2-*a*]pyridin-3-yl)-1-(*p*-tolyl)-4-(trifluoromethyl)-1*H*-pyrrole-2,5-dione (3bb):** Red solid (68.2 mg, 74%); M.p. 150-151 °C;  $R_f = 0.45$  (PE : EA = 92 : 8);  $^1\text{H NMR}$  ( $\text{CDCl}_3$ , 400 MHz):  $\delta$  7.93 (d,  $J = 7.2$  Hz, 1H), 7.67-7.65 (m, 2H), 7.48-7.41 (m, 3H), 7.27-7.19 (m, 5H), 6.89 (t,  $J = 6.8$  Hz, 1H), 2.71 (s, 3H), 2.37 (s, 3H);  $^{13}\text{C}\{^1\text{H}\}$  NMR ( $\text{CDCl}_3$ , 100 MHz):  $\delta$  165.6, 164.4, 152.0, 149.0, 138.7, 134.9, 133.8, 130.0, 129.1, 128.9, 128.8, 128.5, 126.9, 126.3, 125.8, 123.7, 123.3, 120.1 (q,  $J_{\text{C-F}} = 271.0$  Hz), 113.9, 108.5, 21.2, 17.2;  $^{19}\text{F NMR}$  ( $\text{CDCl}_3$ , 376 MHz):  $\delta$  -61.46; HRMS (ESI-TOF)  $m/z$ :  $[\text{M} + \text{H}]^+$  Calcd for  $[\text{C}_{26}\text{H}_{19}\text{F}_3\text{N}_3\text{O}_2]^+$ : 462.1424; found: 462.1427.

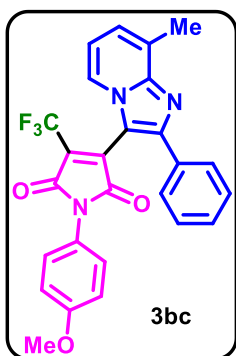

**1-(4-Methoxyphenyl)-3-(8-methyl-2-phenylimidazo[1,2-*a*]pyridin-3-yl)-4-(trifluoromethyl)-1*H*-pyrrole-2,5-dione (3bc):** Red solid (71.6 mg, 75%); M.p. 140-141 °C;  $R_f = 0.50$  (PE : EA = 80 : 20);  $^1\text{H NMR}$  ( $\text{CDCl}_3$ , 400 MHz):  $\delta$  7.93 (d,  $J = 6.8$  Hz, 1H), 7.66-7.64 (m, 2H), 7.47-7.40 (m, 3H), 7.23-7.20 (m, 3H), 6.97-6.94 (m, 2H), 6.89 (t,  $J = 7.2$  Hz, 1H), 3.81 (s, 3H), 2.71 (s, 3H);  $^{13}\text{C}\{^1\text{H}\}$  NMR ( $\text{CDCl}_3$ , 100 MHz): 165.8, 164.6, 159.5, 152.0, 149.0, 134.9, 133.8, 129.2, 128.9, 128.8, 128.5, 127.6, 127.4, 126.9, 123.3, 123.1, 120.1 (q,  $J_{\text{C-F}} = 271.0$  Hz), 114.6, 113.9, 108.6, 55.6, 17.2;  $^{19}\text{F NMR}$  ( $\text{CDCl}_3$ , 376 MHz):  $\delta$  -61.45; HRMS (ESI-TOF)  $m/z$ :  $[\text{M} + \text{H}]^+$  Calcd for  $[\text{C}_{26}\text{H}_{19}\text{F}_3\text{N}_3\text{O}_3]^+$ : 478.1373; found: 478.1378.

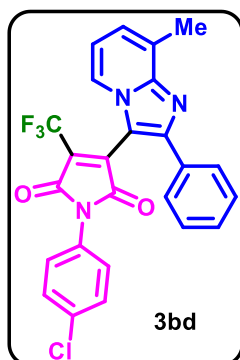

**1-(4-Chlorophenyl)-3-(8-methyl-2-phenylimidazo[1,2-*a*]pyridin-3-yl)-4-**

**(trifluoromethyl)-1*H*-pyrrole-2,5-dione (3bd):** Red solid (65.5 mg, 68%); M.p. 123-124 °C;  $R_f = 0.50$  (PE : EA = 85 : 15);  $^1\text{H NMR}$  ( $\text{CDCl}_3$ , 400 MHz):  $\delta$  7.93 (d,  $J = 6.8$  Hz, 1H), 7.65-7.63 (m, 2H), 7.48-7.41 (m, 5H), 7.30-7.24 (m, 3H), 6.93 (t,  $J = 6.8$  Hz, 1H), 2.73 (s, 3H);  $^{13}\text{C}\{^1\text{H}\}$  NMR ( $\text{CDCl}_3$ , 100 MHz):  $\delta$  165.2, 164.0, 152.0, 148.9, 134.98, 134.96, 134.4, 133.5, 129.6, 129.4, 129.2, 129.0, 128.9, 128.6, 127.4, 127.0, 123.3, 120.1 (q,  $J_{\text{C-F}} = 271.0$  Hz), 114.3, 108.5, 17.3;  $^{19}\text{F NMR}$  ( $\text{CDCl}_3$ , 376 MHz):  $\delta$  -61.42; HRMS (ESI-TOF)  $m/z$ :  $[\text{M} + \text{H}]^+$  Calcd for  $[\text{C}_{25}\text{H}_{16}^{35}\text{ClF}_3\text{N}_3\text{O}_2]^+$ : 482.0878; found: 482.0896.

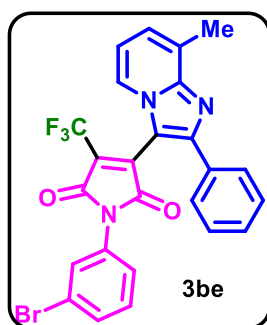

**1-(3-Bromophenyl)-3-(8-methyl-2-phenylimidazo[1,2-*a*]pyridin-3-yl)-4-**

**(trifluoromethyl)-1*H*-pyrrole-2,5-dione (3be):** Red solid (63.1 mg, 60%); M.p. 160-161 °C;  $R_f = 0.45$  (PE : EA = 90 : 10);  $^1\text{H NMR}$  ( $\text{CDCl}_3$ , 400 MHz):  $\delta$  7.93 (d,  $J = 6.8$  Hz, 1H), 7.65-7.63 (m, 2H), 7.54-7.50 (m, 2H), 7.48-7.42 (m, 3H), 7.35-7.28 (m, 2H), 7.24 (s, 1H), 6.93 (t,  $J = 7.2$  Hz, 1H), 2.72 (s, 3H);  $^{13}\text{C}\{^1\text{H}\}$  NMR ( $\text{CDCl}_3$ , 100 MHz):  $\delta$  165.1, 163.9, 149.0, 134.9, 133.6, 131.8, 131.6, 130.6, 129.5, 129.4, 129.0, 128.9, 128.6, 127.8, 127.3, 125.0, 124.4, 123.3, 122.6, 119.8 (q,  $J_{\text{C-F}} = 271.0$  Hz), 114.2, 108.5, 17.3;  $^{19}\text{F NMR}$  ( $\text{CDCl}_3$ , 376 MHz):  $\delta$  -61.43; HRMS (ESI-TOF)  $m/z$ :  $[\text{M} + \text{H}]^+$  Calcd for  $[\text{C}_{25}\text{H}_{16}^{79}\text{BrF}_3\text{N}_3\text{O}_2]^+$ : 526.0373; found: 526.0377.



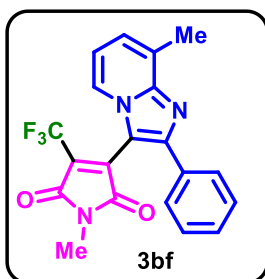

**1-Methyl-3-(8-methyl-2-phenylimidazo[1,2-*a*]pyridin-3-yl)-4-(trifluoromethyl)-1*H*-pyrrole-2,5-dione (3bf):** Red solid (56.2 mg, 73%); M.p. 152-153 °C;  $R_f = 0.40$  (PE : EA = 90 : 10);  $^1\text{H}$  NMR ( $\text{CDCl}_3$ , 400 MHz):  $\delta$  7.85 (d,  $J = 6.8$  Hz, 1H), 7.60-7.58 (m, 2H), 7.44-7.39 (m, 3H), 7.19 (d,  $J = 6.8$  Hz, 1H), 6.87 (t,  $J = 7.2$  Hz, 1H), 3.11 (s, 3H), 2.70 (s, 3H);  $^{13}\text{C}\{^1\text{H}\}$  NMR ( $\text{CDCl}_3$ , 100 MHz):  $\delta$  166.7, 165.6, 151.7, 148.9, 135.28, 135.23, 133.8, 129.1, 128.9, 128.8, 128.5, 126.7, 123.2, 120.0 (q,  $J_{\text{C-F}} = 271.0$  Hz), 113.9, 108.4, 24.9, 17.2;  $^{19}\text{F}$  NMR ( $\text{CDCl}_3$ , 376 MHz):  $\delta$  -61.77; HRMS (ESI-TOF)  $m/z$ :  $[\text{M} + \text{H}]^+$  Calcd for  $[\text{C}_{20}\text{H}_{15}\text{F}_3\text{N}_3\text{O}_2]^+$ : 386.1111; found: 386.1109.

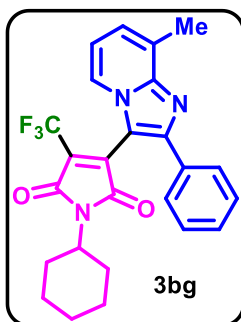

**1-Cyclohexyl-3-(8-methyl-2-phenylimidazo[1,2-*a*]pyridin-3-yl)-4-(trifluoromethyl)-1*H*-pyrrole-2,5-dione (3bg):** Red solid (67.1 mg, 74%); M.p. 110-111 °C;  $R_f = 0.50$  (PE : EA = 90 : 10);  $^1\text{H}$  NMR ( $\text{CDCl}_3$ , 400 MHz):  $\delta$  7.83 (d,  $J = 6.8$  Hz, 1H), 7.60-7.58 (m, 2H), 7.44-7.36 (m, 3H), 7.18 (d,  $J = 6.8$  Hz, 1H), 6.86 (t,  $J = 7.2$  Hz, 1H), 4.04-3.93 (m, 1H), 2.69 (s, 3H), 2.07-1.91 (m, 2H), 1.83-1.80 (m, 2H), 1.69-1.62 (m, 3H), 1.34-1.27 (m, 2H), 1.21-1.13 (m, 1H);  $^{13}\text{C}\{^1\text{H}\}$  NMR ( $\text{CDCl}_3$ , 100 MHz):  $\delta$  166.3, 165.5, 151.3, 148.7, 134.8, 133.9, 129.0, 128.8, 128.7, 128.4, 126.6, 123.9, 123.1, 120.2 (q,  $J_{\text{C-F}} = 271.0$  Hz), 113.8, 108.5, 52.0, 29.8, 29.5, 25.88, 25.86, 24.8, 17.2;  $^{19}\text{F}$  NMR ( $\text{CDCl}_3$ , 376 MHz):  $\delta$  -61.48; HRMS (ESI-TOF)  $m/z$ :  $[\text{M} + \text{H}]^+$  Calcd for  $[\text{C}_{25}\text{H}_{23}\text{F}_3\text{N}_3\text{O}_2]^+$ : 454.1737; found: 454.1735.

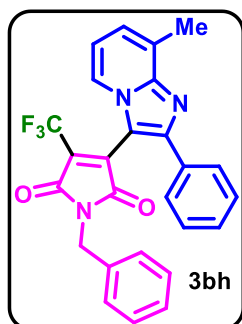

**1-Benzyl-3-(8-methyl-2-phenylimidazo[1,2-*a*]pyridin-3-yl)-4-(trifluoromethyl)-1*H*-pyrrole-2,5-dione (3bh):** Red solid (68.2 mg, 74%); M.p. 158-159 °C;  $R_f = 0.45$  (PE : EA = 90 : 10);  $^1\text{H}$  NMR ( $\text{CDCl}_3$ , 400 MHz):  $\delta$  7.81 (d,  $J = 6.8$  Hz, 1H), 7.59-7.57 (m, 2H), 7.39-7.32 (m, 8H), 7.19 (d,  $J = 6.8$  Hz, 1H), 6.87 (t,  $J = 7.2$  Hz, 1H), 4.77-4.66 (m, 2H), 2.70 (s, 3H);  $^{13}\text{C}\{^1\text{H}\}$  NMR ( $\text{CDCl}_3$ , 100 MHz):  $\delta$  166.3, 165.1, 151.7, 149.0, 135.4, 135.2, 133.9, 129.0, 128.96, 128.90, 128.8, 128.5, 128.3, 126.8, 123.8, 123.1, 120.1 (q,  $J_{\text{C-F}} = 271.0$  Hz), 113.9, 113.8, 108.6, 42.5, 17.2;  $^{19}\text{F}$  NMR ( $\text{CDCl}_3$ , 376 MHz):  $\delta$  -61.38; HRMS (ESI-TOF)  $m/z$ :  $[\text{M} + \text{H}]^+$  Calcd for  $[\text{C}_{26}\text{H}_{19}\text{F}_3\text{N}_3\text{O}_2]^+$ : 462.1424; found: 462.1429.

## 6. Control Experiments:

The productivity of this reaction was not found at all in the presence of radical scavengers like 2,2,6,6-tetramethylpiperidine-1-oxyl (TEMPO), 2,6-di-*tert*-butyl-4-methyl phenol (BHT). Additionally, by employing *p*-benzoquinone (BQ) in the reaction, a trace amount of product was observed (Figure S1, eq A). Notably, the formation of radical-adduct (**4**) was detected by GC-MS in the presence of 1,1-DPE (Figure S1, eq B and ESI, S1 7). These observations clearly highlight that the reaction likely proceeds through a radical pathway.

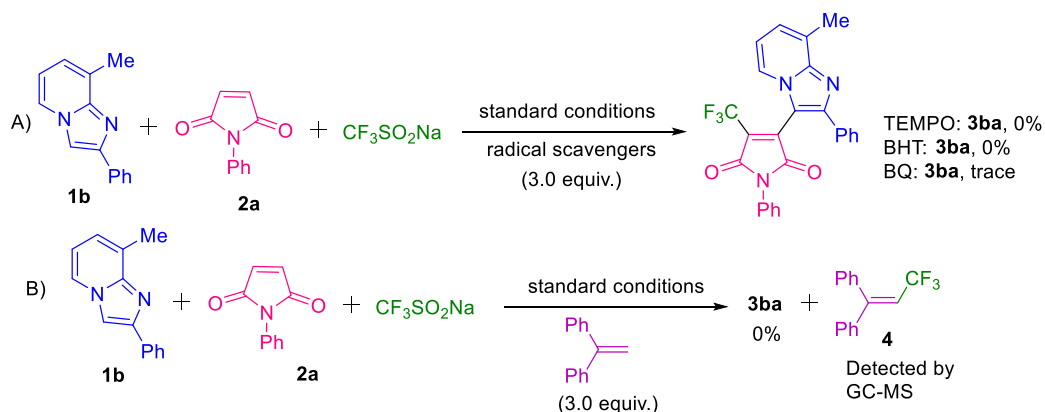

**Figure: S1**

## 7. GC-MS spectra of radical-adduct 4:

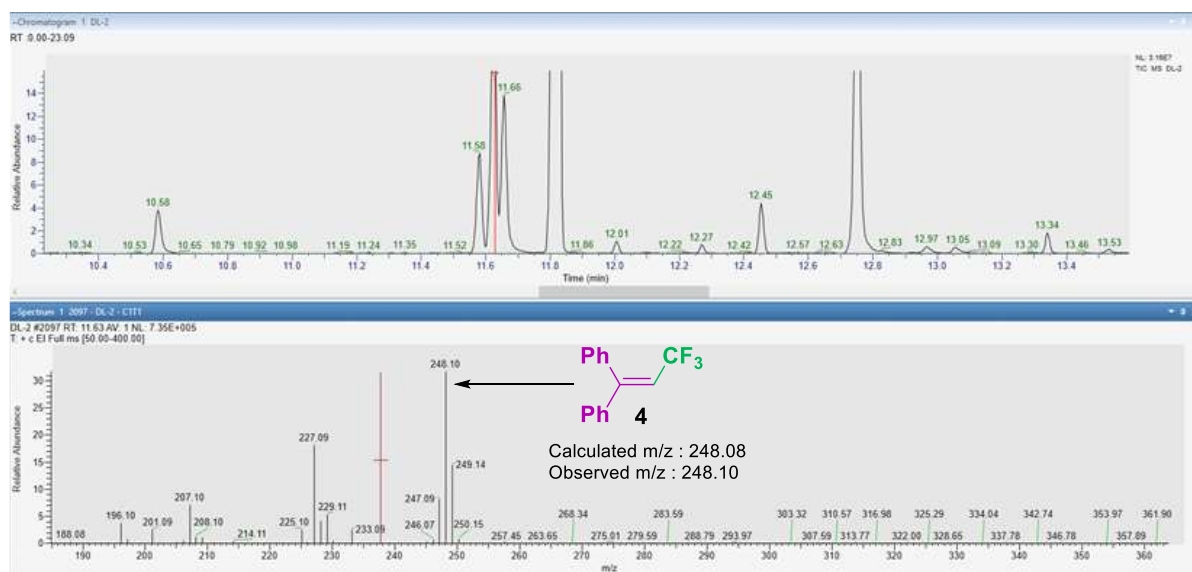

## 8. Computational Studies:

Geometry optimisation and energy calculations for all systems have been executed utilising Gaussian 16 software.<sup>3</sup> The resultant data were visualised, and the progression of calculations was meticulously tracked with various integrated scripts and graphic tools, including Gauss View. The electronic structure calculations were done using the UB3LYP hybrid density functional method.<sup>4</sup> The 6-31+G(d,p) basis set was utilized for all elements, with the LANL2DZ basis set specifically chosen for the iodine atom. Notably, unrestricted spin was taken into account for calculating the radical fragments. The influence of the bulk solvent was approximated by utilising the Polarization Continuum Model (PCM).<sup>5</sup> As dichloroethane (DCE) was employed as the solvent in the experimental process, established solvent-specific parameters were meticulously applied during the computational calculations.

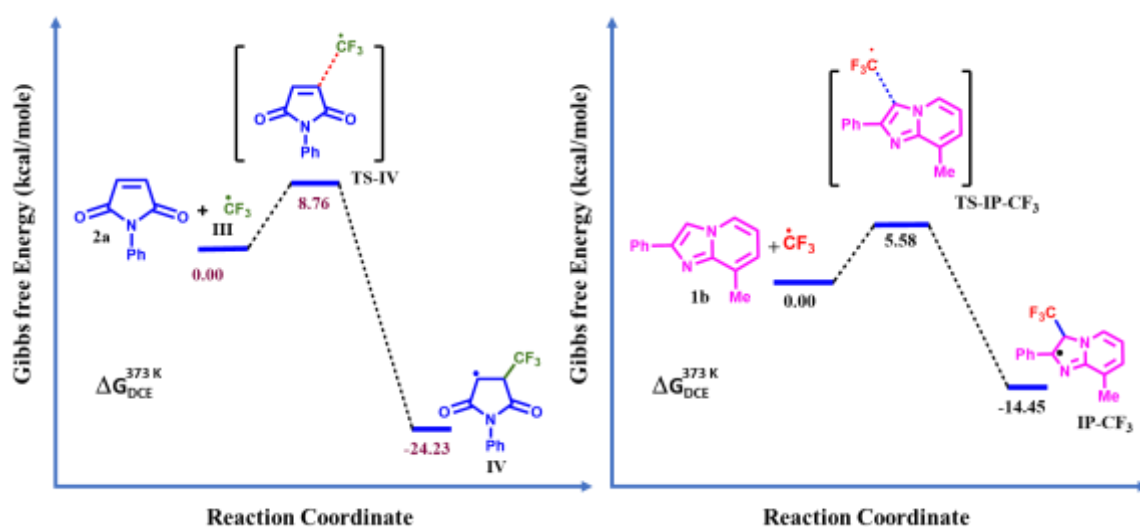

**Figure 1:** Potential energy surface for generated CF<sub>3</sub> maleimide radical intermediate **IV** and CF<sub>3</sub> imidazopyridine radical intermediate **IP-CF<sub>3</sub>**.



|                                           |                                               |
|-------------------------------------------|-----------------------------------------------|
| <b>Statistical Thermodynamic Analysis</b> |                                               |
| Temperature=373.15 K                      | Pressure=1 atm                                |
| Zero-point correction= 0.160857           | Electronic Energy = -928.093644723            |
| Internal Energy (E)= -927.909635723       | Enthalpy (H)= -927.908454723                  |
| Gibbs Free Energy (G)=-928.003931723      | Gibbs Free Energy of Solvation=-928.013016551 |

| St.Pt. | General Structure | Ball & Stick model |
|--------|-------------------|--------------------|
| TS-IV  |                   |                    |

| <u>Cartesian co-ordinate</u> |   |   |   | <u>Frequencies</u> |           |           |
|------------------------------|---|---|---|--------------------|-----------|-----------|
| Atoms                        | X | Y | Z |                    |           |           |
|                              |   |   |   | -223.6579          | 12.9585   | 29.4648   |
|                              |   |   |   | 37.0144            | 57.8892   | 88.1554   |
|                              |   |   |   | 102.4562           | 120.0199  | 129.1387  |
|                              |   |   |   | 153.0693           | 268.0145  | 284.4574  |
|                              |   |   |   | 301.8135           | 383.3039  | 415.1145  |
|                              |   |   |   | 463.1334           | 496.8327  | 499.8923  |
|                              |   |   |   | 508.2710           | 591.0941  | 619.1579  |
|                              |   |   |   | 627.5235           | 640.0983  | 662.7620  |
|                              |   |   |   | 697.1706           | 707.7923  | 721.4549  |
|                              |   |   |   | 752.6871           | 768.5493  | 825.6253  |
|                              |   |   |   | 843.2621           | 920.0514  | 922.4525  |
|                              |   |   |   | 960.3614           | 978.6297  | 1001.3097 |
|                              |   |   |   | 1010.3650          | 1017.5782 | 1038.7750 |
|                              |   |   |   | 1051.3248          | 1071.6865 | 1106.7248 |
|                              |   |   |   | 1151.7778          | 1186.1283 | 1202.5570 |
|                              |   |   |   | 1217.4976          | 1222.1808 | 1235.6626 |
|                              |   |   |   | 1327.9333          | 1346.0123 | 1362.3588 |
|                              |   |   |   | 1399.0419          | 1490.6583 | 1533.7549 |
|                              |   |   |   | 1535.7526          | 1637.5169 | 1648.9310 |
|                              |   |   |   | 1775.0820          | 1830.4571 | 3185.7911 |
|                              |   |   |   | 3196.4014          | 3207.5138 | 3228.2410 |

|   |          |          |          |           |           |           |
|---|----------|----------|----------|-----------|-----------|-----------|
| C | -4.33368 | -0.64870 | 0.70562  | 3229.2821 | 3244.0723 | 3265.2093 |
| H | -5.33405 | -0.92220 | 1.02737  |           |           |           |
| C | -3.53281 | 0.16024  | 1.51599  |           |           |           |
| H | -3.90737 | 0.51902  | 2.46988  |           |           |           |
| C | -3.84204 | -1.10420 | -0.52036 |           |           |           |
| H | -4.45746 | -1.73392 | -1.15571 |           |           |           |
| H | 2.58190  | -0.06627 | -1.88735 |           |           |           |
| H | 2.10625  | 2.50654  | -1.13999 |           |           |           |

### Statistical Thermodynamic Analysis

Temperature=373.15 K

Pressure=1 atm

Zero-point correction= 0.160718

Electronic Energy = -928.086799116

Internal Energy (E)= -927.904513116

Enthalpy (H)= -927.903332116

Gibbs Free Energy (G)=-927.988701116

Gibbs Free Energy of Solvation=-927.999062591

| St.Pt.                       | General Structure                                                                   | Ball & Stick model                                                                   |          |           |           |           |
|------------------------------|-------------------------------------------------------------------------------------|--------------------------------------------------------------------------------------|----------|-----------|-----------|-----------|
| IV                           | 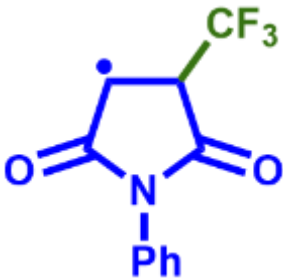 |  |          |           |           |           |
| <u>Cartesian co-ordinate</u> |                                                                                     | <u>Frequencies</u>                                                                   |          |           |           |           |
| -----                        |                                                                                     |                                                                                      |          |           |           |           |
| Atoms                        | X                                                                                   | Y                                                                                    | Z        |           |           |           |
| -----                        |                                                                                     |                                                                                      |          |           |           |           |
| F                            | 3.34522                                                                             | -1.61105                                                                             | 0.27009  | 33.2174   | 41.4952   | 53.6343   |
| O                            | -0.56343                                                                            | 2.62389                                                                              | -0.51267 | 76.7865   | 111.8773  | 139.3383  |
| F                            | 4.08561                                                                             | 0.42622                                                                              | 0.06053  | 161.3490  | 247.7525  | 266.2823  |
| O                            | 0.38847                                                                             | -1.89995                                                                             | -0.29758 | 273.4620  | 315.1406  | 334.7365  |
| F                            | 2.57646                                                                             | -0.03603                                                                             | 1.56857  | 388.6575  | 412.9861  | 472.6318  |
| N                            | -0.43677                                                                            | 0.28033                                                                              | -0.33141 | 500.7311  | 517.2110  | 530.8678  |
| C                            | 1.51236                                                                             | 1.44112                                                                              | -0.76889 | 535.2749  | 582.4381  | 611.5025  |
| C                            | 0.09184                                                                             | 1.59435                                                                              | -0.53422 | 628.4519  | 660.6114  | 688.1634  |
| C                            | 1.88924                                                                             | 0.00250                                                                              | -0.72049 | 697.4095  | 710.5244  | 729.8511  |
| C                            | 0.54863                                                                             | -0.70611                                                                             | -0.41670 | 767.3343  | 796.3255  | 842.2694  |
|                              |                                                                                     |                                                                                      |          | 855.9367  | 924.6466  | 956.6881  |
|                              |                                                                                     |                                                                                      |          | 979.3642  | 1002.8481 | 1017.1785 |
|                              |                                                                                     |                                                                                      |          | 1040.6580 | 1050.6256 | 1059.5237 |
|                              |                                                                                     |                                                                                      |          | 1111.1407 | 1120.3973 | 1166.3240 |

|   |          |          |          |           |           |           |
|---|----------|----------|----------|-----------|-----------|-----------|
| C | -1.82017 | 0.00957  | -0.08119 | 1175.8280 | 1187.1632 | 1202.8249 |
| C | 2.97842  | -0.31952 | 0.30856  | 1215.0471 | 1244.9477 | 1269.0831 |
| C | -2.51963 | 0.79013  | 0.84624  | 1305.4003 | 1347.5032 | 1349.8157 |
| H | -2.01847 | 1.59838  | 1.36441  | 1363.4977 | 1380.3395 | 1491.1100 |
| C | -2.46086 | -1.03012 | -0.76505 | 1532.7357 | 1636.5304 | 1646.9514 |
| H | -1.91011 | -1.63589 | -1.47426 | 1725.5736 | 1825.0838 | 3036.4656 |
| C | -4.51616 | -0.51243 | 0.40949  | 3187.5439 | 3198.5199 | 3209.0698 |
| H | -5.56552 | -0.71566 | 0.60060  | 3231.7088 | 3233.9280 | 3266.8205 |
| C | -3.86879 | 0.52565  | 1.08449  |           |           |           |
| H | -4.41179 | 1.13330  | 1.80183  |           |           |           |
| C | -3.80848 | -1.28830 | -0.51234 |           |           |           |
| H | -4.30391 | -2.09749 | -1.04004 |           |           |           |
| H | 2.27034  | -0.36588 | -1.68380 |           |           |           |
| H | 2.17264  | 2.27613  | -0.95892 |           |           |           |

### Statistical Thermodynamic Analysis

Temperature=373.15 K

Pressure=1 atm

Zero-point correction= 0.163293

Electronic Energy = -928.144653920

Internal Energy (E)= -927.96047192

Enthalpy (H)= -927.95929092

Gibbs Free Energy (G)=-928.03992992

Gibbs Free Energy of Solvation=-928.051626089

| St.Pt.                              | General Structure                                                                   | Ball & Stick model                                                                   |          |          |          |          |
|-------------------------------------|-------------------------------------------------------------------------------------|--------------------------------------------------------------------------------------|----------|----------|----------|----------|
| <b>1b + III</b>                     | 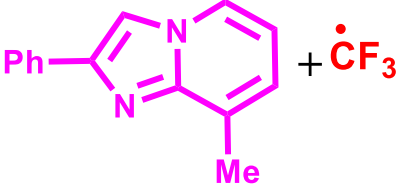 |  |          |          |          |          |
| <b><u>Cartesian co-ordinate</u></b> |                                                                                     | <b><u>Frequencies</u></b>                                                            |          |          |          |          |
| -----                               |                                                                                     |                                                                                      |          |          |          |          |
| Atoms                               | X                                                                                   | Y                                                                                    | Z        | 7.0034   | 13.5465  | 15.9725  |
|                                     |                                                                                     |                                                                                      |          | 19.7101  | 26.1772  | 33.9452  |
|                                     |                                                                                     |                                                                                      |          | 37.8828  | 68.6086  | 101.3131 |
| C                                   | -1.52497                                                                            | -1.14078                                                                             | -0.02286 | 121.4241 | 170.0364 | 188.0726 |
| C                                   | -2.76687                                                                            | -1.65085                                                                             | 0.44918  | 234.8406 | 261.4254 | 297.1023 |
| C                                   | -3.92055                                                                            | -1.13982                                                                             | -0.10854 | 328.6377 | 394.4036 | 412.0698 |
| C                                   | -3.87788                                                                            | -0.13653                                                                             | -1.11905 | 491.6932 | 492.5374 | 497.4423 |
| C                                   | -2.68053                                                                            | 0.34906                                                                              | -1.56513 | 518.2035 | 533.5024 | 558.6179 |



|   |          |          |          |           |           |           |
|---|----------|----------|----------|-----------|-----------|-----------|
| H | -4.88466 | -1.50814 | 0.22913  | 573.3778  | 614.0455  | 633.4955  |
| H | -4.79544 | 0.25373  | -1.54420 | 661.0242  | 664.9156  | 680.8146  |
| H | -2.57270 | 1.11195  | -2.32621 | 698.4981  | 719.9539  | 750.9075  |
| N | -1.52184 | -0.15132 | -1.01997 | 753.1758  | 767.2725  | 791.2114  |
| N | -0.28282 | -1.45699 | 0.33543  | 855.6937  | 881.1814  | 891.9966  |
| C | -0.19900 | 0.14872  | -1.26849 | 933.3937  | 944.9569  | 952.1203  |
| C | 0.54428  | -0.67613 | -0.42687 | 984.8204  | 986.5358  | 1004.2768 |
| C | 2.00852  | -0.76353 | -0.31055 | 1014.0908 | 1016.4742 | 1049.5948 |
| C | 2.58462  | -1.63211 | 0.63215  | 1063.9327 | 1084.4383 | 1097.8573 |
| C | 2.85858  | 0.00308  | -1.12711 | 1104.9123 | 1112.1248 | 1179.4239 |
| C | 3.97092  | -1.72785 | 0.75427  | 1183.6221 | 1204.1224 | 1204.4854 |
| H | 1.92941  | -2.22479 | 1.26093  | 1223.0760 | 1235.5637 | 1273.4122 |
| C | 4.24424  | -0.09356 | -1.00316 | 1288.5648 | 1316.2249 | 1360.3224 |
| H | 2.43951  | 0.67919  | -1.86690 | 1370.2369 | 1381.7207 | 1399.9452 |
| C | 4.80760  | -0.95998 | -0.06108 | 1425.2418 | 1471.2156 | 1477.5893 |
| H | 4.39936  | -2.40401 | 1.48880  | 1482.3669 | 1499.9771 | 1513.0100 |
| H | 4.88448  | 0.50717  | -1.64290 | 1535.0405 | 1571.3032 | 1595.3755 |
| H | 5.88683  | -1.03528 | 0.03534  | 1626.9665 | 1653.7647 | 1671.6055 |
| C | -2.75594 | -2.70806 | 1.51752  | 3044.2654 | 3101.9126 | 3129.2630 |
| H | -2.20056 | -3.59188 | 1.18545  | 3176.1308 | 3183.5817 | 3193.3040 |
| H | -2.25288 | -2.34423 | 2.41999  | 3193.3816 | 3203.9789 | 3218.3941 |
| H | -3.77388 | -3.00879 | 1.77867  | 3220.3176 | 3237.5308 | 3288.2300 |
| C | -0.11311 | 2.63858  | 0.68041  |           |           |           |
| F | -1.13392 | 2.40322  | 1.50271  |           |           |           |
| F | -0.44975 | 3.55720  | -0.23226 |           |           |           |
| F | 0.96267  | 3.02776  | 1.35957  |           |           |           |
| H | 0.08272  | 0.86825  | -2.02058 |           |           |           |

#### Statistical Thermodynamic Analysis

Temperature=373.15 K

Pressure=1 atm

Zero-point correction= 0.237945

Electronic Energy = -987.853776661

Internal Energy (E)= -987.588568661

Enthalpy (H)= -987.587386661

Gibbs Free Energy (G)=-987.691652661

Gibbs Free Energy of Solvation=-987.699686476

| St.Pt.                       | General Structure                                                                   | Ball & Stick model                                                                   |   |           |         |         |
|------------------------------|-------------------------------------------------------------------------------------|--------------------------------------------------------------------------------------|---|-----------|---------|---------|
| TS-IP-CF <sub>3</sub>        | 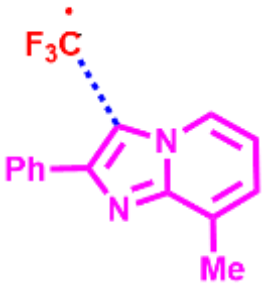 |  |   |           |         |         |
| <b>Cartesian co-ordinate</b> |                                                                                     | <b>Frequencies</b>                                                                   |   |           |         |         |
| -----<br>Atoms               | X                                                                                   | Y                                                                                    | Z | -151.9895 | 10.8048 | 29.4205 |
| -----                        |                                                                                     |                                                                                      |   | 40.9625   | 49.6907 | 63.9248 |

|   |          |          |          |           |           |           |
|---|----------|----------|----------|-----------|-----------|-----------|
| C | -1.51371 | -1.09089 | -0.07455 | 90.0906   | 97.4975   | 113.2188  |
| C | -2.74381 | -1.71321 | 0.26442  | 119.0606  | 167.4150  | 194.0354  |
| C | -3.90418 | -1.11672 | -0.19085 | 235.5470  | 253.0059  | 295.7120  |
| C | -3.87561 | 0.07895  | -0.96208 | 331.3041  | 394.7391  | 412.0256  |
| C | -2.68400 | 0.67546  | -1.27071 | 486.6681  | 487.9700  | 490.0815  |
| H | -4.86270 | -1.56800 | 0.04744  | 518.0475  | 523.1921  | 561.9413  |
| H | -4.79737 | 0.53342  | -1.30615 | 567.2181  | 614.8660  | 624.4226  |
| H | -2.58448 | 1.59400  | -1.83477 | 633.3108  | 661.4798  | 696.0217  |
| N | -1.52351 | 0.08686  | -0.83366 | 700.8381  | 749.3505  | 752.4767  |
| N | -0.26338 | -1.46340 | 0.21492  | 765.5543  | 789.0516  | 790.2576  |
| C | -0.20202 | 0.49421  | -0.95564 | 854.5600  | 887.0200  | 894.4824  |
| C | 0.55453  | -0.53335 | -0.34592 | 933.8993  | 942.5875  | 947.0770  |
| C | 2.01474  | -0.63870 | -0.27365 | 948.8826  | 985.5762  | 985.8064  |
| C | 2.60506  | -1.77119 | 0.31725  | 1004.9038 | 1013.6670 | 1048.6913 |
| C | 2.85185  | 0.36663  | -0.79135 | 1064.2323 | 1082.7639 | 1094.2292 |
| C | 3.99183  | -1.89355 | 0.38249  | 1103.5679 | 1110.4570 | 1129.6040 |
| H | 1.95965  | -2.54452 | 0.71880  | 1159.3890 | 1181.2227 | 1184.3545 |
| C | 4.23883  | 0.24045  | -0.72536 | 1205.5651 | 1236.5460 | 1273.2610 |
| H | 2.42253  | 1.25884  | -1.23642 | 1286.9960 | 1313.2587 | 1358.7519 |
| C | 4.81542  | -0.89035 | -0.13904 | 1366.1578 | 1376.1246 | 1399.9058 |
| H | 4.43222  | -2.77406 | 0.84165  | 1425.2578 | 1460.7384 | 1476.6034 |
| H | 4.86956  | 1.02831  | -1.12673 | 1478.1480 | 1492.8781 | 1499.2437 |
| H | 5.89595  | -0.98713 | -0.08667 | 1526.0460 | 1558.0638 | 1593.9500 |
| C | -2.72197 | -2.97167 | 1.08634  | 1624.6892 | 1649.8475 | 1665.6094 |
| H | -2.13593 | -3.75203 | 0.58928  | 3045.9196 | 3104.3569 | 3131.0865 |
| H | -2.24726 | -2.79385 | 2.05726  | 3179.3513 | 3187.8650 | 3194.8645 |
| H | -3.73556 | -3.34480 | 1.25362  | 3198.1714 | 3206.9453 | 3220.9139 |
| C | -0.19414 | 2.31596  | 0.61930  | 3222.3945 | 3244.8688 | 3275.5252 |
| F | -0.69118 | 1.92104  | 1.80332  |           |           |           |
| F | -1.01502 | 3.26371  | 0.10249  |           |           |           |
| F | 1.01869  | 2.86624  | 0.81385  |           |           |           |
| H | 0.08224  | 1.21443  | -1.70686 |           |           |           |

#### Statistical Thermodynamic Analysis

Temperature=373.15 K

Pressure=1 atm

Zero-point correction= 0.237722

Electronic Energy = -987.852370110

Internal Energy (E)= -987.58885611

Enthalpy (H)= -987.58767411

Gibbs Free Energy (G)=-987.68211811

Gibbs Free Energy of Solvation=-987.690787183

| St.Pt.                                           | General Structure                                                                 | Ball & Stick model                                                                 |                                               |           |           |           |
|--------------------------------------------------|-----------------------------------------------------------------------------------|------------------------------------------------------------------------------------|-----------------------------------------------|-----------|-----------|-----------|
| IP-CF <sub>3</sub>                               | 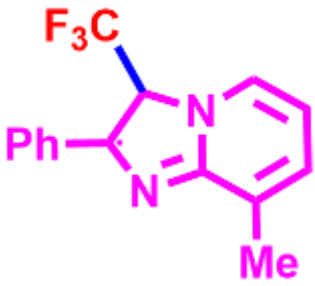 |  |                                               |           |           |           |
| <b><u>Cartesian co-ordinate</u></b>              |                                                                                   | <b><u>Frequencies</u></b>                                                          |                                               |           |           |           |
| -----<br>Atoms                                   | X                                                                                 | Y                                                                                  | Z                                             |           |           |           |
| -----                                            |                                                                                   |                                                                                    |                                               |           |           |           |
| C                                                | -1.53362                                                                          | -0.98932                                                                           | -0.03061                                      | 40.1176   | 49.9608   | 60.4769   |
| C                                                | -2.74268                                                                          | -1.72551                                                                           | 0.09979                                       | 62.7298   | 100.5241  | 113.2499  |
| C                                                | -3.91204                                                                          | -1.11383                                                                           | -0.30680                                      | 124.1980  | 176.7730  | 193.5846  |
| C                                                | -3.92323                                                                          | 0.21214                                                                            | -0.84398                                      | 231.2985  | 234.0801  | 266.2759  |
| C                                                | -2.75712                                                                          | 0.91656                                                                            | -0.93910                                      | 282.9604  | 292.2997  | 327.2430  |
| H                                                | -4.84900                                                                          | -1.65703                                                                           | -0.22607                                      | 399.0307  | 417.5894  | 421.7466  |
| H                                                | -4.84907                                                                          | 0.66824                                                                            | -1.17308                                      | 486.8662  | 510.1859  | 515.4336  |
| H                                                | -2.68996                                                                          | 1.92783                                                                            | -1.31830                                      | 526.8223  | 536.4464  | 569.9476  |
| N                                                | -1.59173                                                                          | 0.32795                                                                            | -0.52086                                      | 615.9451  | 622.5159  | 631.5075  |
| N                                                | -0.28666                                                                          | -1.38512                                                                           | 0.20508                                       | 653.8201  | 694.6264  | 695.1894  |
| C                                                | -0.23916                                                                          | 0.87888                                                                            | -0.50904                                      | 712.9430  | 745.9600  | 766.3718  |
| C                                                | 0.55151                                                                           | -0.37364                                                                           | -0.11391                                      | 772.3169  | 838.7338  | 843.5376  |
| C                                                | 1.98362                                                                           | -0.52748                                                                           | -0.15932                                      | 884.9075  | 891.0797  | 899.0308  |
| C                                                | 2.57340                                                                           | -1.71717                                                                           | 0.34121                                       | 912.5701  | 934.5582  | 968.3344  |
| C                                                | 2.84081                                                                           | 0.44649                                                                            | -0.72662                                      | 977.9781  | 995.4208  | 1001.0669 |
| C                                                | 3.94810                                                                           | -1.90907                                                                           | 0.28428                                       | 1016.7564 | 1049.3775 | 1063.0261 |
| H                                                | 1.92659                                                                           | -2.47409                                                                           | 0.77033                                       | 1067.6106 | 1091.1091 | 1106.7433 |
| C                                                | 4.21732                                                                           | 0.24085                                                                            | -0.78532                                      | 1113.0211 | 1166.2298 | 1175.1983 |
| H                                                | 2.43246                                                                           | 1.36830                                                                            | -1.12605                                      | 1181.2192 | 1200.2902 | 1211.4717 |
| C                                                | 4.78344                                                                           | -0.93343                                                                           | -0.27849                                      | 1240.8197 | 1247.0093 | 1251.4528 |
| H                                                | 4.37633                                                                           | -2.82592                                                                           | 0.68011                                       | 1274.4258 | 1336.3937 | 1336.6804 |
| H                                                | 4.85173                                                                           | 1.00297                                                                            | -1.22915                                      | 1361.1306 | 1364.3752 | 1370.3122 |
| H                                                | 5.85745                                                                           | -1.08764                                                                           | -0.32112                                      | 1401.5049 | 1426.0673 | 1467.5261 |
| C                                                | -2.68611                                                                          | -3.12404                                                                           | 0.64915                                       | 1476.7312 | 1479.2164 | 1490.5093 |
| H                                                | -2.02795                                                                          | -3.75411                                                                           | 0.04140                                       | 1510.7773 | 1543.6349 | 1582.1338 |
| H                                                | -2.27394                                                                          | -3.12847                                                                           | 1.66398                                       | 1602.6400 | 1628.2739 | 1644.3008 |
| H                                                | -3.68222                                                                          | -3.57329                                                                           | 0.67262                                       | 2997.4101 | 3045.1372 | 3103.2872 |
| C                                                | -0.15422                                                                          | 2.04612                                                                            | 0.50711                                       | 3130.4803 | 3177.7313 | 3185.3783 |
| F                                                | -0.52325                                                                          | 1.67200                                                                            | 1.74646                                       | 3193.1793 | 3201.4628 | 3211.3466 |
| F                                                | -0.97598                                                                          | 3.06836                                                                            | 0.13414                                       | 3221.1403 | 3226.0141 | 3250.3797 |
| F                                                | 1.09216                                                                           | 2.55563                                                                            | 0.57839                                       |           |           |           |
| H                                                | 0.03986                                                                           | 1.30419                                                                            | -1.48517                                      |           |           |           |
| <b><u>Statistical Thermodynamic Analysis</u></b> |                                                                                   |                                                                                    |                                               |           |           |           |
| Temperature=373.15 K                             |                                                                                   |                                                                                    | Pressure=1 atm                                |           |           |           |
| Zero-point correction= 0.240163                  |                                                                                   |                                                                                    | Electronic Energy = -987.892383235            |           |           |           |
| Internal Energy (E)= -987.627128235              |                                                                                   |                                                                                    | Enthalpy (H)= -987.625946235                  |           |           |           |
| Gibbs Free Energy (G)=-987.714673235             |                                                                                   |                                                                                    | Gibbs Free Energy of Solvation=-987.722713249 |           |           |           |

| St.Pt.                                                                                                                                                                                                                                                                                                                                                                                                                                                                                                                                                                                                                                                                                                                                                                                                                                                                                                       | General Structure                                                                 | Ball & Stick model                                                                  |          |   |                      |                |                                 |                                    |                                    |                             |                                     |                                               |         |   |          |          |         |   |         |          |         |   |          |          |          |   |          |         |          |   |          |         |          |   |          |         |         |                                                                                                                                                                                                                                                                                                                                                                                                                                                         |  |  |         |          |          |          |          |           |           |           |           |           |           |           |           |           |           |
|--------------------------------------------------------------------------------------------------------------------------------------------------------------------------------------------------------------------------------------------------------------------------------------------------------------------------------------------------------------------------------------------------------------------------------------------------------------------------------------------------------------------------------------------------------------------------------------------------------------------------------------------------------------------------------------------------------------------------------------------------------------------------------------------------------------------------------------------------------------------------------------------------------------|-----------------------------------------------------------------------------------|-------------------------------------------------------------------------------------|----------|---|----------------------|----------------|---------------------------------|------------------------------------|------------------------------------|-----------------------------|-------------------------------------|-----------------------------------------------|---------|---|----------|----------|---------|---|---------|----------|---------|---|----------|----------|----------|---|----------|---------|----------|---|----------|---------|----------|---|----------|---------|---------|---------------------------------------------------------------------------------------------------------------------------------------------------------------------------------------------------------------------------------------------------------------------------------------------------------------------------------------------------------------------------------------------------------------------------------------------------------|--|--|---------|----------|----------|----------|----------|-----------|-----------|-----------|-----------|-----------|-----------|-----------|-----------|-----------|-----------|
| Acetate ion                                                                                                                                                                                                                                                                                                                                                                                                                                                                                                                                                                                                                                                                                                                                                                                                                                                                                                  | 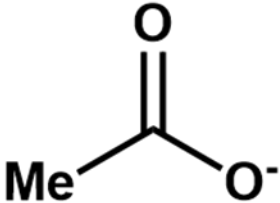 |  |          |   |                      |                |                                 |                                    |                                    |                             |                                     |                                               |         |   |          |          |         |   |         |          |         |   |          |          |          |   |          |         |          |   |          |         |          |   |          |         |         |                                                                                                                                                                                                                                                                                                                                                                                                                                                         |  |  |         |          |          |          |          |           |           |           |           |           |           |           |           |           |           |
| <p style="text-align: center;"><b><u>Cartesian co-ordinate</u></b></p> <p>-----</p> <table border="1"> <thead> <tr> <th data-bbox="164 936 240 965">Atoms</th> <th data-bbox="363 936 384 965">X</th> <th data-bbox="564 936 585 965">Y</th> <th data-bbox="751 936 772 965">Z</th> </tr> </thead> <tbody> <tr><td colspan="4">-----</td></tr> <tr> <td>C</td> <td>-0.00028</td> <td>-1.35371</td> <td>0.00000</td> </tr> <tr> <td>H</td> <td>-0.48399</td> <td>-1.75537</td> <td>0.89495</td> </tr> <tr> <td>H</td> <td>1.04105</td> <td>-1.69996</td> <td>0.00000</td> </tr> <tr> <td>H</td> <td>-0.48399</td> <td>-1.75537</td> <td>-0.89495</td> </tr> <tr> <td>C</td> <td>-0.01115</td> <td>0.18745</td> <td>-0.00000</td> </tr> <tr> <td>O</td> <td>-0.00028</td> <td>0.76301</td> <td>-1.12926</td> </tr> <tr> <td>O</td> <td>-0.00028</td> <td>0.76301</td> <td>1.12926</td> </tr> </tbody> </table> |                                                                                   | Atoms                                                                               | X        | Y | Z                    | -----          |                                 |                                    |                                    | C                           | -0.00028                            | -1.35371                                      | 0.00000 | H | -0.48399 | -1.75537 | 0.89495 | H | 1.04105 | -1.69996 | 0.00000 | H | -0.48399 | -1.75537 | -0.89495 | C | -0.01115 | 0.18745 | -0.00000 | O | -0.00028 | 0.76301 | -1.12926 | O | -0.00028 | 0.76301 | 1.12926 | <p style="text-align: center;"><b><u>Frequencies</u></b></p> <table border="1"> <tbody> <tr> <td>43.9096</td> <td>450.4062</td> <td>603.4113</td> </tr> <tr> <td>636.9904</td> <td>895.4531</td> <td>1016.5423</td> </tr> <tr> <td>1046.2592</td> <td>1353.8930</td> <td>1396.0355</td> </tr> <tr> <td>1459.5870</td> <td>1479.3260</td> <td>1583.4350</td> </tr> <tr> <td>3034.0383</td> <td>3100.6858</td> <td>3126.7779</td> </tr> </tbody> </table> |  |  | 43.9096 | 450.4062 | 603.4113 | 636.9904 | 895.4531 | 1016.5423 | 1046.2592 | 1353.8930 | 1396.0355 | 1459.5870 | 1479.3260 | 1583.4350 | 3034.0383 | 3100.6858 | 3126.7779 |
| Atoms                                                                                                                                                                                                                                                                                                                                                                                                                                                                                                                                                                                                                                                                                                                                                                                                                                                                                                        | X                                                                                 | Y                                                                                   | Z        |   |                      |                |                                 |                                    |                                    |                             |                                     |                                               |         |   |          |          |         |   |         |          |         |   |          |          |          |   |          |         |          |   |          |         |          |   |          |         |         |                                                                                                                                                                                                                                                                                                                                                                                                                                                         |  |  |         |          |          |          |          |           |           |           |           |           |           |           |           |           |           |
| -----                                                                                                                                                                                                                                                                                                                                                                                                                                                                                                                                                                                                                                                                                                                                                                                                                                                                                                        |                                                                                   |                                                                                     |          |   |                      |                |                                 |                                    |                                    |                             |                                     |                                               |         |   |          |          |         |   |         |          |         |   |          |          |          |   |          |         |          |   |          |         |          |   |          |         |         |                                                                                                                                                                                                                                                                                                                                                                                                                                                         |  |  |         |          |          |          |          |           |           |           |           |           |           |           |           |           |           |
| C                                                                                                                                                                                                                                                                                                                                                                                                                                                                                                                                                                                                                                                                                                                                                                                                                                                                                                            | -0.00028                                                                          | -1.35371                                                                            | 0.00000  |   |                      |                |                                 |                                    |                                    |                             |                                     |                                               |         |   |          |          |         |   |         |          |         |   |          |          |          |   |          |         |          |   |          |         |          |   |          |         |         |                                                                                                                                                                                                                                                                                                                                                                                                                                                         |  |  |         |          |          |          |          |           |           |           |           |           |           |           |           |           |           |
| H                                                                                                                                                                                                                                                                                                                                                                                                                                                                                                                                                                                                                                                                                                                                                                                                                                                                                                            | -0.48399                                                                          | -1.75537                                                                            | 0.89495  |   |                      |                |                                 |                                    |                                    |                             |                                     |                                               |         |   |          |          |         |   |         |          |         |   |          |          |          |   |          |         |          |   |          |         |          |   |          |         |         |                                                                                                                                                                                                                                                                                                                                                                                                                                                         |  |  |         |          |          |          |          |           |           |           |           |           |           |           |           |           |           |
| H                                                                                                                                                                                                                                                                                                                                                                                                                                                                                                                                                                                                                                                                                                                                                                                                                                                                                                            | 1.04105                                                                           | -1.69996                                                                            | 0.00000  |   |                      |                |                                 |                                    |                                    |                             |                                     |                                               |         |   |          |          |         |   |         |          |         |   |          |          |          |   |          |         |          |   |          |         |          |   |          |         |         |                                                                                                                                                                                                                                                                                                                                                                                                                                                         |  |  |         |          |          |          |          |           |           |           |           |           |           |           |           |           |           |
| H                                                                                                                                                                                                                                                                                                                                                                                                                                                                                                                                                                                                                                                                                                                                                                                                                                                                                                            | -0.48399                                                                          | -1.75537                                                                            | -0.89495 |   |                      |                |                                 |                                    |                                    |                             |                                     |                                               |         |   |          |          |         |   |         |          |         |   |          |          |          |   |          |         |          |   |          |         |          |   |          |         |         |                                                                                                                                                                                                                                                                                                                                                                                                                                                         |  |  |         |          |          |          |          |           |           |           |           |           |           |           |           |           |           |
| C                                                                                                                                                                                                                                                                                                                                                                                                                                                                                                                                                                                                                                                                                                                                                                                                                                                                                                            | -0.01115                                                                          | 0.18745                                                                             | -0.00000 |   |                      |                |                                 |                                    |                                    |                             |                                     |                                               |         |   |          |          |         |   |         |          |         |   |          |          |          |   |          |         |          |   |          |         |          |   |          |         |         |                                                                                                                                                                                                                                                                                                                                                                                                                                                         |  |  |         |          |          |          |          |           |           |           |           |           |           |           |           |           |           |
| O                                                                                                                                                                                                                                                                                                                                                                                                                                                                                                                                                                                                                                                                                                                                                                                                                                                                                                            | -0.00028                                                                          | 0.76301                                                                             | -1.12926 |   |                      |                |                                 |                                    |                                    |                             |                                     |                                               |         |   |          |          |         |   |         |          |         |   |          |          |          |   |          |         |          |   |          |         |          |   |          |         |         |                                                                                                                                                                                                                                                                                                                                                                                                                                                         |  |  |         |          |          |          |          |           |           |           |           |           |           |           |           |           |           |
| O                                                                                                                                                                                                                                                                                                                                                                                                                                                                                                                                                                                                                                                                                                                                                                                                                                                                                                            | -0.00028                                                                          | 0.76301                                                                             | 1.12926  |   |                      |                |                                 |                                    |                                    |                             |                                     |                                               |         |   |          |          |         |   |         |          |         |   |          |          |          |   |          |         |          |   |          |         |          |   |          |         |         |                                                                                                                                                                                                                                                                                                                                                                                                                                                         |  |  |         |          |          |          |          |           |           |           |           |           |           |           |           |           |           |
| 43.9096                                                                                                                                                                                                                                                                                                                                                                                                                                                                                                                                                                                                                                                                                                                                                                                                                                                                                                      | 450.4062                                                                          | 603.4113                                                                            |          |   |                      |                |                                 |                                    |                                    |                             |                                     |                                               |         |   |          |          |         |   |         |          |         |   |          |          |          |   |          |         |          |   |          |         |          |   |          |         |         |                                                                                                                                                                                                                                                                                                                                                                                                                                                         |  |  |         |          |          |          |          |           |           |           |           |           |           |           |           |           |           |
| 636.9904                                                                                                                                                                                                                                                                                                                                                                                                                                                                                                                                                                                                                                                                                                                                                                                                                                                                                                     | 895.4531                                                                          | 1016.5423                                                                           |          |   |                      |                |                                 |                                    |                                    |                             |                                     |                                               |         |   |          |          |         |   |         |          |         |   |          |          |          |   |          |         |          |   |          |         |          |   |          |         |         |                                                                                                                                                                                                                                                                                                                                                                                                                                                         |  |  |         |          |          |          |          |           |           |           |           |           |           |           |           |           |           |
| 1046.2592                                                                                                                                                                                                                                                                                                                                                                                                                                                                                                                                                                                                                                                                                                                                                                                                                                                                                                    | 1353.8930                                                                         | 1396.0355                                                                           |          |   |                      |                |                                 |                                    |                                    |                             |                                     |                                               |         |   |          |          |         |   |         |          |         |   |          |          |          |   |          |         |          |   |          |         |          |   |          |         |         |                                                                                                                                                                                                                                                                                                                                                                                                                                                         |  |  |         |          |          |          |          |           |           |           |           |           |           |           |           |           |           |
| 1459.5870                                                                                                                                                                                                                                                                                                                                                                                                                                                                                                                                                                                                                                                                                                                                                                                                                                                                                                    | 1479.3260                                                                         | 1583.4350                                                                           |          |   |                      |                |                                 |                                    |                                    |                             |                                     |                                               |         |   |          |          |         |   |         |          |         |   |          |          |          |   |          |         |          |   |          |         |          |   |          |         |         |                                                                                                                                                                                                                                                                                                                                                                                                                                                         |  |  |         |          |          |          |          |           |           |           |           |           |           |           |           |           |           |
| 3034.0383                                                                                                                                                                                                                                                                                                                                                                                                                                                                                                                                                                                                                                                                                                                                                                                                                                                                                                    | 3100.6858                                                                         | 3126.7779                                                                           |          |   |                      |                |                                 |                                    |                                    |                             |                                     |                                               |         |   |          |          |         |   |         |          |         |   |          |          |          |   |          |         |          |   |          |         |          |   |          |         |         |                                                                                                                                                                                                                                                                                                                                                                                                                                                         |  |  |         |          |          |          |          |           |           |           |           |           |           |           |           |           |           |
| <p style="text-align: center;"><b><u>Statistical Thermodynamic Analysis</u></b></p> <table border="0"> <tr> <td>Temperature=373.15 K</td> <td>Pressure=1 atm</td> </tr> <tr> <td>Zero-point correction= 0.048358</td> <td>Electronic Energy = -228.638898750</td> </tr> <tr> <td>Internal Energy (E)= -228.58446375</td> <td>Enthalpy (H)= -228.58328175</td> </tr> <tr> <td>Gibbs Free Energy (G)=-228.62644775</td> <td>Gibbs Free Energy of Solvation=-228.530426694</td> </tr> </table>                                                                                                                                                                                                                                                                                                                                                                                                                  |                                                                                   |                                                                                     |          |   | Temperature=373.15 K | Pressure=1 atm | Zero-point correction= 0.048358 | Electronic Energy = -228.638898750 | Internal Energy (E)= -228.58446375 | Enthalpy (H)= -228.58328175 | Gibbs Free Energy (G)=-228.62644775 | Gibbs Free Energy of Solvation=-228.530426694 |         |   |          |          |         |   |         |          |         |   |          |          |          |   |          |         |          |   |          |         |          |   |          |         |         |                                                                                                                                                                                                                                                                                                                                                                                                                                                         |  |  |         |          |          |          |          |           |           |           |           |           |           |           |           |           |           |
| Temperature=373.15 K                                                                                                                                                                                                                                                                                                                                                                                                                                                                                                                                                                                                                                                                                                                                                                                                                                                                                         | Pressure=1 atm                                                                    |                                                                                     |          |   |                      |                |                                 |                                    |                                    |                             |                                     |                                               |         |   |          |          |         |   |         |          |         |   |          |          |          |   |          |         |          |   |          |         |          |   |          |         |         |                                                                                                                                                                                                                                                                                                                                                                                                                                                         |  |  |         |          |          |          |          |           |           |           |           |           |           |           |           |           |           |
| Zero-point correction= 0.048358                                                                                                                                                                                                                                                                                                                                                                                                                                                                                                                                                                                                                                                                                                                                                                                                                                                                              | Electronic Energy = -228.638898750                                                |                                                                                     |          |   |                      |                |                                 |                                    |                                    |                             |                                     |                                               |         |   |          |          |         |   |         |          |         |   |          |          |          |   |          |         |          |   |          |         |          |   |          |         |         |                                                                                                                                                                                                                                                                                                                                                                                                                                                         |  |  |         |          |          |          |          |           |           |           |           |           |           |           |           |           |           |
| Internal Energy (E)= -228.58446375                                                                                                                                                                                                                                                                                                                                                                                                                                                                                                                                                                                                                                                                                                                                                                                                                                                                           | Enthalpy (H)= -228.58328175                                                       |                                                                                     |          |   |                      |                |                                 |                                    |                                    |                             |                                     |                                               |         |   |          |          |         |   |         |          |         |   |          |          |          |   |          |         |          |   |          |         |          |   |          |         |         |                                                                                                                                                                                                                                                                                                                                                                                                                                                         |  |  |         |          |          |          |          |           |           |           |           |           |           |           |           |           |           |
| Gibbs Free Energy (G)=-228.62644775                                                                                                                                                                                                                                                                                                                                                                                                                                                                                                                                                                                                                                                                                                                                                                                                                                                                          | Gibbs Free Energy of Solvation=-228.530426694                                     |                                                                                     |          |   |                      |                |                                 |                                    |                                    |                             |                                     |                                               |         |   |          |          |         |   |         |          |         |   |          |          |          |   |          |         |          |   |          |         |          |   |          |         |         |                                                                                                                                                                                                                                                                                                                                                                                                                                                         |  |  |         |          |          |          |          |           |           |           |           |           |           |           |           |           |           |

| St.Pt.                                                                                                                                                                                                                                                                                                                                                                                                                                                                                                                                                                                                                                                                                                                                                                                                                                                                                                                                                                                                                                                                                                                                                                                                                                                                                                                                                                                                                                                                                                                                                                                                                                                                                                                                                            | General Structure                                                                 | Ball & Stick model                                                                 |          |   |                      |                                             |                                 |                                    |                                     |                              |                                      |                                               |          |   |         |         |          |   |         |          |          |   |         |          |         |   |          |         |          |   |          |          |         |   |          |         |         |   |          |          |          |                                                                                                                                                                                                                                                                                                                                                                                                                                                                                                                                                                                                                                                                                                                                                                                                                                                                                                                                                                                                                                                                            |  |  |         |          |          |          |          |          |           |           |           |           |           |           |           |           |           |           |           |           |
|-------------------------------------------------------------------------------------------------------------------------------------------------------------------------------------------------------------------------------------------------------------------------------------------------------------------------------------------------------------------------------------------------------------------------------------------------------------------------------------------------------------------------------------------------------------------------------------------------------------------------------------------------------------------------------------------------------------------------------------------------------------------------------------------------------------------------------------------------------------------------------------------------------------------------------------------------------------------------------------------------------------------------------------------------------------------------------------------------------------------------------------------------------------------------------------------------------------------------------------------------------------------------------------------------------------------------------------------------------------------------------------------------------------------------------------------------------------------------------------------------------------------------------------------------------------------------------------------------------------------------------------------------------------------------------------------------------------------------------------------------------------------|-----------------------------------------------------------------------------------|------------------------------------------------------------------------------------|----------|---|----------------------|---------------------------------------------|---------------------------------|------------------------------------|-------------------------------------|------------------------------|--------------------------------------|-----------------------------------------------|----------|---|---------|---------|----------|---|---------|----------|----------|---|---------|----------|---------|---|----------|---------|----------|---|----------|----------|---------|---|----------|---------|---------|---|----------|----------|----------|----------------------------------------------------------------------------------------------------------------------------------------------------------------------------------------------------------------------------------------------------------------------------------------------------------------------------------------------------------------------------------------------------------------------------------------------------------------------------------------------------------------------------------------------------------------------------------------------------------------------------------------------------------------------------------------------------------------------------------------------------------------------------------------------------------------------------------------------------------------------------------------------------------------------------------------------------------------------------------------------------------------------------------------------------------------------------|--|--|---------|----------|----------|----------|----------|----------|-----------|-----------|-----------|-----------|-----------|-----------|-----------|-----------|-----------|-----------|-----------|-----------|
| Acetic Acid                                                                                                                                                                                                                                                                                                                                                                                                                                                                                                                                                                                                                                                                                                                                                                                                                                                                                                                                                                                                                                                                                                                                                                                                                                                                                                                                                                                                                                                                                                                                                                                                                                                                                                                                                       | 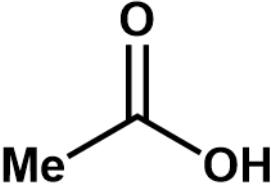 |  |          |   |                      |                                             |                                 |                                    |                                     |                              |                                      |                                               |          |   |         |         |          |   |         |          |          |   |         |          |         |   |          |         |          |   |          |          |         |   |          |         |         |   |          |          |          |                                                                                                                                                                                                                                                                                                                                                                                                                                                                                                                                                                                                                                                                                                                                                                                                                                                                                                                                                                                                                                                                            |  |  |         |          |          |          |          |          |           |           |           |           |           |           |           |           |           |           |           |           |
| <p style="text-align: center;"><b><u>Cartesian co-ordinate</u></b></p> <hr style="border-top: 1px dashed black;"/> <table border="1" style="width: 100%; border-collapse: collapse;"> <thead> <tr> <th style="text-align: left;">Atoms</th> <th style="text-align: center;">X</th> <th style="text-align: center;">Y</th> <th style="text-align: center;">Z</th> </tr> </thead> <tbody> <tr><td colspan="4"><hr style="border-top: 1px dashed black;"/></td></tr> <tr><td>C</td><td style="text-align: center;">1.39616</td><td style="text-align: center;">-0.12116</td><td style="text-align: center;">-0.00001</td></tr> <tr><td>H</td><td style="text-align: center;">1.92586</td><td style="text-align: center;">0.83051</td><td style="text-align: center;">-0.00028</td></tr> <tr><td>H</td><td style="text-align: center;">1.67670</td><td style="text-align: center;">-0.70460</td><td style="text-align: center;">-0.88204</td></tr> <tr><td>H</td><td style="text-align: center;">1.67668</td><td style="text-align: center;">-0.70400</td><td style="text-align: center;">0.88243</td></tr> <tr><td>C</td><td style="text-align: center;">-0.08735</td><td style="text-align: center;">0.12034</td><td style="text-align: center;">-0.00002</td></tr> <tr><td>O</td><td style="text-align: center;">-0.79111</td><td style="text-align: center;">-1.03517</td><td style="text-align: center;">0.00002</td></tr> <tr><td>O</td><td style="text-align: center;">-0.63301</td><td style="text-align: center;">1.20978</td><td style="text-align: center;">0.00001</td></tr> <tr><td>H</td><td style="text-align: center;">-1.73908</td><td style="text-align: center;">-0.81383</td><td style="text-align: center;">-0.00009</td></tr> </tbody> </table> |                                                                                   | Atoms                                                                              | X        | Y | Z                    | <hr style="border-top: 1px dashed black;"/> |                                 |                                    |                                     | C                            | 1.39616                              | -0.12116                                      | -0.00001 | H | 1.92586 | 0.83051 | -0.00028 | H | 1.67670 | -0.70460 | -0.88204 | H | 1.67668 | -0.70400 | 0.88243 | C | -0.08735 | 0.12034 | -0.00002 | O | -0.79111 | -1.03517 | 0.00002 | O | -0.63301 | 1.20978 | 0.00001 | H | -1.73908 | -0.81383 | -0.00009 | <p style="text-align: center;"><b><u>Frequencies</u></b></p> <table border="1" style="width: 100%; border-collapse: collapse;"> <tbody> <tr><td style="text-align: center;">61.5487</td><td style="text-align: center;">428.0033</td><td style="text-align: center;">545.2672</td></tr> <tr><td style="text-align: center;">577.7843</td><td style="text-align: center;">648.9303</td><td style="text-align: center;">866.9908</td></tr> <tr><td style="text-align: center;">1002.6795</td><td style="text-align: center;">1064.8413</td><td style="text-align: center;">1194.7045</td></tr> <tr><td style="text-align: center;">1332.6039</td><td style="text-align: center;">1409.2903</td><td style="text-align: center;">1462.9659</td></tr> <tr><td style="text-align: center;">1469.8960</td><td style="text-align: center;">1774.5123</td><td style="text-align: center;">3066.1544</td></tr> <tr><td style="text-align: center;">3132.4456</td><td style="text-align: center;">3181.7000</td><td style="text-align: center;">3740.4508</td></tr> </tbody> </table> |  |  | 61.5487 | 428.0033 | 545.2672 | 577.7843 | 648.9303 | 866.9908 | 1002.6795 | 1064.8413 | 1194.7045 | 1332.6039 | 1409.2903 | 1462.9659 | 1469.8960 | 1774.5123 | 3066.1544 | 3132.4456 | 3181.7000 | 3740.4508 |
| Atoms                                                                                                                                                                                                                                                                                                                                                                                                                                                                                                                                                                                                                                                                                                                                                                                                                                                                                                                                                                                                                                                                                                                                                                                                                                                                                                                                                                                                                                                                                                                                                                                                                                                                                                                                                             | X                                                                                 | Y                                                                                  | Z        |   |                      |                                             |                                 |                                    |                                     |                              |                                      |                                               |          |   |         |         |          |   |         |          |          |   |         |          |         |   |          |         |          |   |          |          |         |   |          |         |         |   |          |          |          |                                                                                                                                                                                                                                                                                                                                                                                                                                                                                                                                                                                                                                                                                                                                                                                                                                                                                                                                                                                                                                                                            |  |  |         |          |          |          |          |          |           |           |           |           |           |           |           |           |           |           |           |           |
| <hr style="border-top: 1px dashed black;"/>                                                                                                                                                                                                                                                                                                                                                                                                                                                                                                                                                                                                                                                                                                                                                                                                                                                                                                                                                                                                                                                                                                                                                                                                                                                                                                                                                                                                                                                                                                                                                                                                                                                                                                                       |                                                                                   |                                                                                    |          |   |                      |                                             |                                 |                                    |                                     |                              |                                      |                                               |          |   |         |         |          |   |         |          |          |   |         |          |         |   |          |         |          |   |          |          |         |   |          |         |         |   |          |          |          |                                                                                                                                                                                                                                                                                                                                                                                                                                                                                                                                                                                                                                                                                                                                                                                                                                                                                                                                                                                                                                                                            |  |  |         |          |          |          |          |          |           |           |           |           |           |           |           |           |           |           |           |           |
| C                                                                                                                                                                                                                                                                                                                                                                                                                                                                                                                                                                                                                                                                                                                                                                                                                                                                                                                                                                                                                                                                                                                                                                                                                                                                                                                                                                                                                                                                                                                                                                                                                                                                                                                                                                 | 1.39616                                                                           | -0.12116                                                                           | -0.00001 |   |                      |                                             |                                 |                                    |                                     |                              |                                      |                                               |          |   |         |         |          |   |         |          |          |   |         |          |         |   |          |         |          |   |          |          |         |   |          |         |         |   |          |          |          |                                                                                                                                                                                                                                                                                                                                                                                                                                                                                                                                                                                                                                                                                                                                                                                                                                                                                                                                                                                                                                                                            |  |  |         |          |          |          |          |          |           |           |           |           |           |           |           |           |           |           |           |           |
| H                                                                                                                                                                                                                                                                                                                                                                                                                                                                                                                                                                                                                                                                                                                                                                                                                                                                                                                                                                                                                                                                                                                                                                                                                                                                                                                                                                                                                                                                                                                                                                                                                                                                                                                                                                 | 1.92586                                                                           | 0.83051                                                                            | -0.00028 |   |                      |                                             |                                 |                                    |                                     |                              |                                      |                                               |          |   |         |         |          |   |         |          |          |   |         |          |         |   |          |         |          |   |          |          |         |   |          |         |         |   |          |          |          |                                                                                                                                                                                                                                                                                                                                                                                                                                                                                                                                                                                                                                                                                                                                                                                                                                                                                                                                                                                                                                                                            |  |  |         |          |          |          |          |          |           |           |           |           |           |           |           |           |           |           |           |           |
| H                                                                                                                                                                                                                                                                                                                                                                                                                                                                                                                                                                                                                                                                                                                                                                                                                                                                                                                                                                                                                                                                                                                                                                                                                                                                                                                                                                                                                                                                                                                                                                                                                                                                                                                                                                 | 1.67670                                                                           | -0.70460                                                                           | -0.88204 |   |                      |                                             |                                 |                                    |                                     |                              |                                      |                                               |          |   |         |         |          |   |         |          |          |   |         |          |         |   |          |         |          |   |          |          |         |   |          |         |         |   |          |          |          |                                                                                                                                                                                                                                                                                                                                                                                                                                                                                                                                                                                                                                                                                                                                                                                                                                                                                                                                                                                                                                                                            |  |  |         |          |          |          |          |          |           |           |           |           |           |           |           |           |           |           |           |           |
| H                                                                                                                                                                                                                                                                                                                                                                                                                                                                                                                                                                                                                                                                                                                                                                                                                                                                                                                                                                                                                                                                                                                                                                                                                                                                                                                                                                                                                                                                                                                                                                                                                                                                                                                                                                 | 1.67668                                                                           | -0.70400                                                                           | 0.88243  |   |                      |                                             |                                 |                                    |                                     |                              |                                      |                                               |          |   |         |         |          |   |         |          |          |   |         |          |         |   |          |         |          |   |          |          |         |   |          |         |         |   |          |          |          |                                                                                                                                                                                                                                                                                                                                                                                                                                                                                                                                                                                                                                                                                                                                                                                                                                                                                                                                                                                                                                                                            |  |  |         |          |          |          |          |          |           |           |           |           |           |           |           |           |           |           |           |           |
| C                                                                                                                                                                                                                                                                                                                                                                                                                                                                                                                                                                                                                                                                                                                                                                                                                                                                                                                                                                                                                                                                                                                                                                                                                                                                                                                                                                                                                                                                                                                                                                                                                                                                                                                                                                 | -0.08735                                                                          | 0.12034                                                                            | -0.00002 |   |                      |                                             |                                 |                                    |                                     |                              |                                      |                                               |          |   |         |         |          |   |         |          |          |   |         |          |         |   |          |         |          |   |          |          |         |   |          |         |         |   |          |          |          |                                                                                                                                                                                                                                                                                                                                                                                                                                                                                                                                                                                                                                                                                                                                                                                                                                                                                                                                                                                                                                                                            |  |  |         |          |          |          |          |          |           |           |           |           |           |           |           |           |           |           |           |           |
| O                                                                                                                                                                                                                                                                                                                                                                                                                                                                                                                                                                                                                                                                                                                                                                                                                                                                                                                                                                                                                                                                                                                                                                                                                                                                                                                                                                                                                                                                                                                                                                                                                                                                                                                                                                 | -0.79111                                                                          | -1.03517                                                                           | 0.00002  |   |                      |                                             |                                 |                                    |                                     |                              |                                      |                                               |          |   |         |         |          |   |         |          |          |   |         |          |         |   |          |         |          |   |          |          |         |   |          |         |         |   |          |          |          |                                                                                                                                                                                                                                                                                                                                                                                                                                                                                                                                                                                                                                                                                                                                                                                                                                                                                                                                                                                                                                                                            |  |  |         |          |          |          |          |          |           |           |           |           |           |           |           |           |           |           |           |           |
| O                                                                                                                                                                                                                                                                                                                                                                                                                                                                                                                                                                                                                                                                                                                                                                                                                                                                                                                                                                                                                                                                                                                                                                                                                                                                                                                                                                                                                                                                                                                                                                                                                                                                                                                                                                 | -0.63301                                                                          | 1.20978                                                                            | 0.00001  |   |                      |                                             |                                 |                                    |                                     |                              |                                      |                                               |          |   |         |         |          |   |         |          |          |   |         |          |         |   |          |         |          |   |          |          |         |   |          |         |         |   |          |          |          |                                                                                                                                                                                                                                                                                                                                                                                                                                                                                                                                                                                                                                                                                                                                                                                                                                                                                                                                                                                                                                                                            |  |  |         |          |          |          |          |          |           |           |           |           |           |           |           |           |           |           |           |           |
| H                                                                                                                                                                                                                                                                                                                                                                                                                                                                                                                                                                                                                                                                                                                                                                                                                                                                                                                                                                                                                                                                                                                                                                                                                                                                                                                                                                                                                                                                                                                                                                                                                                                                                                                                                                 | -1.73908                                                                          | -0.81383                                                                           | -0.00009 |   |                      |                                             |                                 |                                    |                                     |                              |                                      |                                               |          |   |         |         |          |   |         |          |          |   |         |          |         |   |          |         |          |   |          |          |         |   |          |         |         |   |          |          |          |                                                                                                                                                                                                                                                                                                                                                                                                                                                                                                                                                                                                                                                                                                                                                                                                                                                                                                                                                                                                                                                                            |  |  |         |          |          |          |          |          |           |           |           |           |           |           |           |           |           |           |           |           |
| 61.5487                                                                                                                                                                                                                                                                                                                                                                                                                                                                                                                                                                                                                                                                                                                                                                                                                                                                                                                                                                                                                                                                                                                                                                                                                                                                                                                                                                                                                                                                                                                                                                                                                                                                                                                                                           | 428.0033                                                                          | 545.2672                                                                           |          |   |                      |                                             |                                 |                                    |                                     |                              |                                      |                                               |          |   |         |         |          |   |         |          |          |   |         |          |         |   |          |         |          |   |          |          |         |   |          |         |         |   |          |          |          |                                                                                                                                                                                                                                                                                                                                                                                                                                                                                                                                                                                                                                                                                                                                                                                                                                                                                                                                                                                                                                                                            |  |  |         |          |          |          |          |          |           |           |           |           |           |           |           |           |           |           |           |           |
| 577.7843                                                                                                                                                                                                                                                                                                                                                                                                                                                                                                                                                                                                                                                                                                                                                                                                                                                                                                                                                                                                                                                                                                                                                                                                                                                                                                                                                                                                                                                                                                                                                                                                                                                                                                                                                          | 648.9303                                                                          | 866.9908                                                                           |          |   |                      |                                             |                                 |                                    |                                     |                              |                                      |                                               |          |   |         |         |          |   |         |          |          |   |         |          |         |   |          |         |          |   |          |          |         |   |          |         |         |   |          |          |          |                                                                                                                                                                                                                                                                                                                                                                                                                                                                                                                                                                                                                                                                                                                                                                                                                                                                                                                                                                                                                                                                            |  |  |         |          |          |          |          |          |           |           |           |           |           |           |           |           |           |           |           |           |
| 1002.6795                                                                                                                                                                                                                                                                                                                                                                                                                                                                                                                                                                                                                                                                                                                                                                                                                                                                                                                                                                                                                                                                                                                                                                                                                                                                                                                                                                                                                                                                                                                                                                                                                                                                                                                                                         | 1064.8413                                                                         | 1194.7045                                                                          |          |   |                      |                                             |                                 |                                    |                                     |                              |                                      |                                               |          |   |         |         |          |   |         |          |          |   |         |          |         |   |          |         |          |   |          |          |         |   |          |         |         |   |          |          |          |                                                                                                                                                                                                                                                                                                                                                                                                                                                                                                                                                                                                                                                                                                                                                                                                                                                                                                                                                                                                                                                                            |  |  |         |          |          |          |          |          |           |           |           |           |           |           |           |           |           |           |           |           |
| 1332.6039                                                                                                                                                                                                                                                                                                                                                                                                                                                                                                                                                                                                                                                                                                                                                                                                                                                                                                                                                                                                                                                                                                                                                                                                                                                                                                                                                                                                                                                                                                                                                                                                                                                                                                                                                         | 1409.2903                                                                         | 1462.9659                                                                          |          |   |                      |                                             |                                 |                                    |                                     |                              |                                      |                                               |          |   |         |         |          |   |         |          |          |   |         |          |         |   |          |         |          |   |          |          |         |   |          |         |         |   |          |          |          |                                                                                                                                                                                                                                                                                                                                                                                                                                                                                                                                                                                                                                                                                                                                                                                                                                                                                                                                                                                                                                                                            |  |  |         |          |          |          |          |          |           |           |           |           |           |           |           |           |           |           |           |           |
| 1469.8960                                                                                                                                                                                                                                                                                                                                                                                                                                                                                                                                                                                                                                                                                                                                                                                                                                                                                                                                                                                                                                                                                                                                                                                                                                                                                                                                                                                                                                                                                                                                                                                                                                                                                                                                                         | 1774.5123                                                                         | 3066.1544                                                                          |          |   |                      |                                             |                                 |                                    |                                     |                              |                                      |                                               |          |   |         |         |          |   |         |          |          |   |         |          |         |   |          |         |          |   |          |          |         |   |          |         |         |   |          |          |          |                                                                                                                                                                                                                                                                                                                                                                                                                                                                                                                                                                                                                                                                                                                                                                                                                                                                                                                                                                                                                                                                            |  |  |         |          |          |          |          |          |           |           |           |           |           |           |           |           |           |           |           |           |
| 3132.4456                                                                                                                                                                                                                                                                                                                                                                                                                                                                                                                                                                                                                                                                                                                                                                                                                                                                                                                                                                                                                                                                                                                                                                                                                                                                                                                                                                                                                                                                                                                                                                                                                                                                                                                                                         | 3181.7000                                                                         | 3740.4508                                                                          |          |   |                      |                                             |                                 |                                    |                                     |                              |                                      |                                               |          |   |         |         |          |   |         |          |          |   |         |          |         |   |          |         |          |   |          |          |         |   |          |         |         |   |          |          |          |                                                                                                                                                                                                                                                                                                                                                                                                                                                                                                                                                                                                                                                                                                                                                                                                                                                                                                                                                                                                                                                                            |  |  |         |          |          |          |          |          |           |           |           |           |           |           |           |           |           |           |           |           |
| <p><b><u>Statistical Thermodynamic Analysis</u></b></p> <table style="width: 100%;"> <tr> <td>Temperature=373.15 K</td> <td>Pressure=1 atm</td> </tr> <tr> <td>Zero-point correction= 0.061421</td> <td>Electronic Energy = -229.113005988</td> </tr> <tr> <td>Internal Energy (E)= -229.045102988</td> <td>Enthalpy (H)= -229.043921988</td> </tr> <tr> <td>Gibbs Free Energy (G)=-229.087420988</td> <td>Gibbs Free Energy of Solvation=-229.080133806</td> </tr> </table>                                                                                                                                                                                                                                                                                                                                                                                                                                                                                                                                                                                                                                                                                                                                                                                                                                                                                                                                                                                                                                                                                                                                                                                                                                                                                      |                                                                                   |                                                                                    |          |   | Temperature=373.15 K | Pressure=1 atm                              | Zero-point correction= 0.061421 | Electronic Energy = -229.113005988 | Internal Energy (E)= -229.045102988 | Enthalpy (H)= -229.043921988 | Gibbs Free Energy (G)=-229.087420988 | Gibbs Free Energy of Solvation=-229.080133806 |          |   |         |         |          |   |         |          |          |   |         |          |         |   |          |         |          |   |          |          |         |   |          |         |         |   |          |          |          |                                                                                                                                                                                                                                                                                                                                                                                                                                                                                                                                                                                                                                                                                                                                                                                                                                                                                                                                                                                                                                                                            |  |  |         |          |          |          |          |          |           |           |           |           |           |           |           |           |           |           |           |           |
| Temperature=373.15 K                                                                                                                                                                                                                                                                                                                                                                                                                                                                                                                                                                                                                                                                                                                                                                                                                                                                                                                                                                                                                                                                                                                                                                                                                                                                                                                                                                                                                                                                                                                                                                                                                                                                                                                                              | Pressure=1 atm                                                                    |                                                                                    |          |   |                      |                                             |                                 |                                    |                                     |                              |                                      |                                               |          |   |         |         |          |   |         |          |          |   |         |          |         |   |          |         |          |   |          |          |         |   |          |         |         |   |          |          |          |                                                                                                                                                                                                                                                                                                                                                                                                                                                                                                                                                                                                                                                                                                                                                                                                                                                                                                                                                                                                                                                                            |  |  |         |          |          |          |          |          |           |           |           |           |           |           |           |           |           |           |           |           |
| Zero-point correction= 0.061421                                                                                                                                                                                                                                                                                                                                                                                                                                                                                                                                                                                                                                                                                                                                                                                                                                                                                                                                                                                                                                                                                                                                                                                                                                                                                                                                                                                                                                                                                                                                                                                                                                                                                                                                   | Electronic Energy = -229.113005988                                                |                                                                                    |          |   |                      |                                             |                                 |                                    |                                     |                              |                                      |                                               |          |   |         |         |          |   |         |          |          |   |         |          |         |   |          |         |          |   |          |          |         |   |          |         |         |   |          |          |          |                                                                                                                                                                                                                                                                                                                                                                                                                                                                                                                                                                                                                                                                                                                                                                                                                                                                                                                                                                                                                                                                            |  |  |         |          |          |          |          |          |           |           |           |           |           |           |           |           |           |           |           |           |
| Internal Energy (E)= -229.045102988                                                                                                                                                                                                                                                                                                                                                                                                                                                                                                                                                                                                                                                                                                                                                                                                                                                                                                                                                                                                                                                                                                                                                                                                                                                                                                                                                                                                                                                                                                                                                                                                                                                                                                                               | Enthalpy (H)= -229.043921988                                                      |                                                                                    |          |   |                      |                                             |                                 |                                    |                                     |                              |                                      |                                               |          |   |         |         |          |   |         |          |          |   |         |          |         |   |          |         |          |   |          |          |         |   |          |         |         |   |          |          |          |                                                                                                                                                                                                                                                                                                                                                                                                                                                                                                                                                                                                                                                                                                                                                                                                                                                                                                                                                                                                                                                                            |  |  |         |          |          |          |          |          |           |           |           |           |           |           |           |           |           |           |           |           |
| Gibbs Free Energy (G)=-229.087420988                                                                                                                                                                                                                                                                                                                                                                                                                                                                                                                                                                                                                                                                                                                                                                                                                                                                                                                                                                                                                                                                                                                                                                                                                                                                                                                                                                                                                                                                                                                                                                                                                                                                                                                              | Gibbs Free Energy of Solvation=-229.080133806                                     |                                                                                    |          |   |                      |                                             |                                 |                                    |                                     |                              |                                      |                                               |          |   |         |         |          |   |         |          |          |   |         |          |         |   |          |         |          |   |          |          |         |   |          |         |         |   |          |          |          |                                                                                                                                                                                                                                                                                                                                                                                                                                                                                                                                                                                                                                                                                                                                                                                                                                                                                                                                                                                                                                                                            |  |  |         |          |          |          |          |          |           |           |           |           |           |           |           |           |           |           |           |           |

| St.Pt.                              | General Structure                                                                 | Ball & Stick model                                                                  |          |           |           |           |
|-------------------------------------|-----------------------------------------------------------------------------------|-------------------------------------------------------------------------------------|----------|-----------|-----------|-----------|
| <b>1b</b>                           | 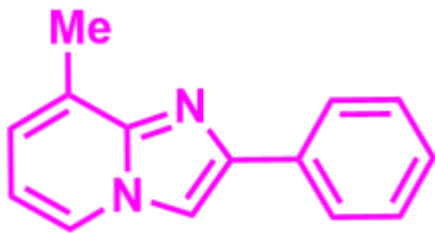 |  |          |           |           |           |
| <b><u>Cartesian co-ordinate</u></b> |                                                                                   | <b><u>Frequencies</u></b>                                                           |          |           |           |           |
| -----                               |                                                                                   |                                                                                     |          |           |           |           |
| Atoms                               | X                                                                                 | Y                                                                                   | Z        | 4.5664    | 66.8222   | 98.7844   |
| -----                               |                                                                                   |                                                                                     |          | 126.1191  | 167.5276  | 185.7034  |
|                                     |                                                                                   |                                                                                     |          | 233.1027  | 263.1321  | 295.8058  |
|                                     |                                                                                   |                                                                                     |          | 329.2325  | 392.9829  | 414.0278  |
|                                     |                                                                                   |                                                                                     |          | 501.1839  | 517.4345  | 536.6705  |
| N                                   | -1.55859                                                                          | -1.07318                                                                            | -0.00223 | 558.1522  | 574.7442  | 612.9205  |
| N                                   | -0.35612                                                                          | 0.83043                                                                             | 0.00207  | 631.9747  | 659.8748  | 678.6087  |
| C                                   | -0.22935                                                                          | -1.43829                                                                            | -0.00296 | 701.9766  | 727.4434  | 749.0132  |
| C                                   | 0.49194                                                                           | -0.25209                                                                            | -0.00026 | 755.3150  | 773.5618  | 796.3666  |
| C                                   | 1.95601                                                                           | -0.08772                                                                            | -0.00006 | 855.4013  | 890.2523  | 890.6279  |
| C                                   | -2.70056                                                                          | -1.84082                                                                            | -0.00432 | 933.3259  | 951.6478  | 955.0253  |
| H                                   | -2.56627                                                                          | -2.91511                                                                            | -0.00697 | 984.5697  | 988.2613  | 1005.9437 |
| C                                   | -1.59209                                                                          | 0.32980                                                                             | 0.00092  | 1011.0777 | 1046.3964 | 1060.9804 |
| C                                   | -2.85047                                                                          | 0.99740                                                                             | 0.00248  | 1084.1540 | 1096.4795 | 1101.4852 |
| C                                   | 2.81826                                                                           | -1.20045                                                                            | 0.00754  | 1109.2776 | 1177.9482 | 1179.4450 |
| H                                   | 2.40947                                                                           | -2.20638                                                                            | 0.01405  | 1199.8662 | 1235.4400 | 1276.2173 |
| C                                   | -2.88361                                                                          | 2.50100                                                                             | 0.00613  | 1287.5531 | 1313.9404 | 1356.5599 |
| H                                   | -2.37069                                                                          | 2.90821                                                                             | -0.87238 | 1368.8820 | 1377.8249 | 1398.1511 |
| H                                   | -2.37093                                                                          | 2.90384                                                                             | 0.88679  | 1417.8880 | 1464.8161 | 1468.7152 |
| H                                   | -3.91378                                                                          | 2.86534                                                                             | 0.00689  | 1479.5425 | 1494.2093 | 1513.5945 |
| C                                   | -3.98683                                                                          | 0.21465                                                                             | 0.00048  | 1530.7618 | 1574.5195 | 1594.5275 |
| H                                   | -4.96242                                                                          | 0.69130                                                                             | 0.00156  | 1622.6037 | 1649.4062 | 1669.6825 |
| C                                   | 2.52446                                                                           | 1.19878                                                                             | -0.00762 | 3040.7400 | 3095.1763 | 3131.0563 |
| H                                   | 1.86847                                                                           | 2.06232                                                                             | -0.01372 | 3180.5580 | 3187.2012 | 3196.8176 |
| C                                   | -3.91240                                                                          | -1.20870                                                                            | -0.00298 | 3197.3058 | 3206.0134 | 3216.2595 |
| H                                   | -4.81734                                                                          | -1.80517                                                                            | -0.00460 | 3223.2914 | 3243.0896 | 3290.3759 |
| C                                   | 4.20337                                                                           | -1.03103                                                                            | 0.00747  |           |           |           |
| H                                   | 4.85024                                                                           | -1.90365                                                                            | 0.01355  |           |           |           |



|                                           |         |                                               |         |  |
|-------------------------------------------|---------|-----------------------------------------------|---------|--|
| H                                         | 4.70463 | 1.82736                                       | 0.88865 |  |
| <b>Statistical Thermodynamic Analysis</b> |         |                                               |         |  |
| Temperature=373.15 K                      |         | Pressure=1 atm                                |         |  |
| Zero-point correction= 0.139209           |         | Electronic Energy = -471.479851960            |         |  |
| Internal Energy (E)= -471.32304896        |         | Enthalpy (H)= -471.32186696                   |         |  |
| Gibbs Free Energy (G)=-471.40054796       |         | Gibbs Free Energy of Solvation=-471.390118143 |         |  |

| St.Pt.                       | General Structure | Ball & Stick model                                                                   |          |           |           |           |
|------------------------------|-------------------|--------------------------------------------------------------------------------------|----------|-----------|-----------|-----------|
| PhI                          | PhI               |  |          |           |           |           |
| <b>Cartesian co-ordinate</b> |                   | <b>Frequencies</b>                                                                   |          |           |           |           |
| -----                        |                   |                                                                                      |          |           |           |           |
| Atoms                        | X                 | Y                                                                                    | Z        | 152.8235  | 222.4947  | 254.9545  |
| -----                        |                   |                                                                                      |          | 412.0508  | 455.8428  | 621.2355  |
| C                            | 0.00000           | 1.20906                                                                              | -2.66197 | 653.5494  | 683.2097  | 742.4813  |
| C                            | 0.00000           | 1.21727                                                                              | -1.26186 | 846.8751  | 923.5638  | 987.0339  |
| C                            | 0.00000           | 0.00000                                                                              | -0.57790 | 996.5714  | 1007.5715 | 1026.7224 |
| C                            | -0.00000          | -1.21727                                                                             | -1.26186 | 1074.0994 | 1095.3416 | 1178.6720 |
| C                            | -0.00000          | -1.20906                                                                             | -2.66197 | 1199.8623 | 1324.7740 | 1343.7525 |
| C                            | 0.00000           | 0.00000                                                                              | -3.36386 | 1469.1700 | 1503.0526 | 1613.6696 |
| H                            | 0.00000           | 2.15396                                                                              | -3.19786 | 1623.5826 | 3189.9324 | 3197.4115 |
| H                            | 0.00000           | 2.15873                                                                              | -0.72350 | 3210.0188 | 3219.2892 | 3221.4817 |
| H                            | -0.00000          | -2.15873                                                                             | -0.72350 |           |           |           |
| H                            | -0.00000          | -2.15396                                                                             | -3.19786 |           |           |           |
| H                            | 0.00000           | 0.00000                                                                              | -4.44968 |           |           |           |
|                              | 0.00000           | -0.00000                                                                             | 1.56658  |           |           |           |
| O                            | 1.81284           | 1.27527                                                                              | -0.00037 |           |           |           |
| C                            | 3.02986           | 0.83013                                                                              | -0.00028 |           |           |           |
| O                            | 3.37179           | -0.36083                                                                             | -0.00013 |           |           |           |
| C                            | 4.07880           | 1.94822                                                                              | -0.00010 |           |           |           |
| H                            | 4.70890           | 1.82384                                                                              | -0.88531 |           |           |           |
| H                            | 3.62840           | 2.94089                                                                              | -0.00302 |           |           |           |
| H                            | 4.70463           | 1.82736                                                                              | 0.88865  |           |           |           |

|                                           |  |                                    |  |
|-------------------------------------------|--|------------------------------------|--|
| <b>Statistical Thermodynamic Analysis</b> |  |                                    |  |
| Temperature=373.15 K                      |  | Pressure=1 atm                     |  |
| Zero-point correction= 0.089876           |  | Electronic Energy = -243.042537542 |  |



Internal Energy (E)= -242.943828542    Enthalpy (H)= -242.942646542  
 Gibbs Free Energy (G)=-242.993698542    Gibbs Free Energy of Solvation=-242.990574237

| St.Pt.                       | General Structure                                                                  | Ball & Stick model                                                                  |          |           |           |           |
|------------------------------|------------------------------------------------------------------------------------|-------------------------------------------------------------------------------------|----------|-----------|-----------|-----------|
| V                            | 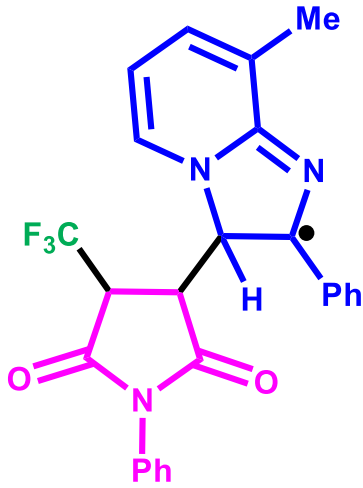 |  |          |           |           |           |
| <b>Cartesian co-ordinate</b> |                                                                                    | <b>Frequencies</b>                                                                  |          |           |           |           |
| -----<br>Atoms               | X                                                                                  | Y                                                                                   | Z        |           |           |           |
| -----                        |                                                                                    |                                                                                     |          |           |           |           |
| F                            | -1.01560                                                                           | -3.32526                                                                            | -2.78864 | 17.0464   | 17.9415   | 31.0234   |
| O                            | -0.51894                                                                           | 0.84328                                                                             | 1.37103  | 38.5408   | 45.2839   | 53.7071   |
| F                            | 1.01780                                                                            | -2.81035                                                                            | -2.19834 | 56.0052   | 57.1100   | 72.6274   |
| O                            | -3.11758                                                                           | -1.83077                                                                            | -1.31017 | 80.9530   | 87.4428   | 93.3673   |
| F                            | -0.37800                                                                           | -3.60429                                                                            | -0.72249 | 114.6232  | 128.5130  | 150.8126  |
| N                            | 0.94661                                                                            | 1.61398                                                                             | -1.30241 | 169.3934  | 198.4161  | 203.1475  |
| N                            | -2.08362                                                                           | -0.42084                                                                            | 0.21321  | 210.1300  | 239.1631  | 256.8821  |
| N                            | 2.46624                                                                            | 1.86236                                                                             | 0.37794  | 267.9829  | 288.4277  | 310.5119  |
| C                            | 0.18741                                                                            | -0.66890                                                                            | -0.42186 | 314.4177  | 336.0229  | 377.2680  |
| C                            | -0.80268                                                                           | 0.03926                                                                             | 0.50824  | 407.5424  | 412.0594  | 418.3232  |
| C                            | 1.34510                                                                            | 0.23966                                                                             | -0.91416 | 419.4886  | 466.5760  | 487.6172  |
| C                            | 2.36568                                                                            | 0.57802                                                                             | 0.17902  | 497.7437  | 503.7304  | 511.4577  |
| C                            | -0.70662                                                                           | -1.35973                                                                            | -1.47517 | 530.1258  | 530.6442  | 547.7264  |
| C                            | 3.14463                                                                            | -0.40737                                                                            | 0.91485  | 567.2813  | 606.5916  | 615.3715  |
| C                            | 0.11806                                                                            | 2.01298                                                                             | -2.29678 | 621.1899  | 628.4306  | 629.5060  |
| H                            | -0.33516                                                                           | 1.25601                                                                             | -2.92093 | 631.1001  | 653.0341  | 665.3837  |
| C                            | -2.12757                                                                           | -1.27937                                                                            | -0.88588 | 689.2002  | 695.7355  | 704.6364  |
| C                            | -3.25436                                                                           | -0.04381                                                                            | 0.96638  | 723.8481  | 739.2704  | 761.5308  |
| C                            | 1.61464                                                                            | 2.49875                                                                             | -0.49757 | 771.9751  | 785.2929  | 788.0734  |
| C                            | 1.43029                                                                            | 3.88203                                                                             | -0.63439 | 804.9577  | 839.7218  | 852.7699  |
| C                            | -0.28253                                                                           | -2.78859                                                                            | -1.79803 | 858.5073  | 879.6238  | 888.7426  |
| C                            | 3.33557                                                                            | -1.71458                                                                            | 0.42178  | 911.3968  | 912.9265  | 939.1396  |
| H                            | 2.91746                                                                            | -2.01622                                                                            | -0.53290 | 939.7189  | 957.5277  | 966.8463  |
| C                            | 2.16441                                                                            | 4.84054                                                                             | 0.26037  | 990.5872  | 1000.9888 | 1001.5572 |
| H                            | 3.24685                                                                            | 4.71414                                                                             | 0.16040  | 1010.5603 | 1011.3733 | 1015.8487 |
| H                            | 1.91237                                                                            | 4.66292                                                                             | 1.31041  | 1016.3053 | 1022.7133 | 1034.7622 |
|                              |                                                                                    |                                                                                     |          | 1047.0601 | 1055.6486 | 1058.3515 |
|                              |                                                                                    |                                                                                     |          | 1067.8918 | 1084.5778 | 1096.6522 |
|                              |                                                                                    |                                                                                     |          | 1102.1680 | 1113.8222 | 1117.3836 |

|   |          |          |          |           |           |           |
|---|----------|----------|----------|-----------|-----------|-----------|
| H | 1.90811  | 5.87113  | 0.00902  | 1122.5593 | 1153.1003 | 1183.7687 |
| C | 0.55118  | 4.28884  | -1.63928 | 1186.9642 | 1188.3773 | 1199.0472 |
| H | 0.37471  | 5.34932  | -1.78797 | 1202.8326 | 1207.0771 | 1216.1055 |
| C | 3.73878  | -0.03726 | 2.14039  | 1223.5644 | 1236.4575 | 1253.4874 |
| H | 3.58518  | 0.96608  | 2.52134  | 1260.3971 | 1277.0841 | 1291.8747 |
| C | -0.09786 | 3.36416  | -2.47336 | 1294.9493 | 1311.6935 | 1335.6130 |
| H | -0.76219 | 3.69357  | -3.26229 | 1338.4862 | 1351.1921 | 1356.3031 |
| C | -3.55508 | -0.72726 | 2.14591  | 1356.8727 | 1365.9654 | 1370.8731 |
| H | -2.91260 | -1.53279 | 2.48645  | 1398.8094 | 1403.1061 | 1420.9239 |
| C | -4.06309 | 0.99337  | 0.49824  | 1457.8668 | 1472.1518 | 1479.4662 |
| H | -3.80778 | 1.50888  | -0.42197 | 1486.7877 | 1495.2276 | 1520.1288 |
| C | 4.10436  | -2.62868 | 1.13965  | 1528.8071 | 1532.3245 | 1580.4694 |
| H | 4.25510  | -3.62906 | 0.74764  | 1617.5776 | 1625.8338 | 1637.3905 |
| C | -5.51029 | 0.67746  | 2.41507  | 1642.0163 | 1643.6651 | 1662.1116 |
| H | -6.39258 | 0.95913  | 2.98136  | 1762.9075 | 1845.2291 | 3057.1968 |
| C | -4.69027 | -0.35914 | 2.87202  | 3073.5179 | 3092.6959 | 3113.6003 |
| H | -4.93294 | -0.88383 | 3.79052  | 3119.0694 | 3150.7694 | 3194.8194 |
| C | 4.49812  | -0.95772 | 2.85460  | 3198.3375 | 3202.3510 | 3205.4144 |
| H | 4.94484  | -0.66947 | 3.80063  | 3208.3708 | 3211.9445 | 3214.9940 |
| C | 4.68238  | -2.25434 | 2.35684  | 3215.9161 | 3220.0327 | 3220.3456 |
| H | 5.27644  | -2.97013 | 2.91645  | 3227.1721 | 3245.5732 | 3270.1260 |
| C | -5.19759 | 1.35168  | 1.23033  |           |           |           |
| H | -5.83389 | 2.15583  | 0.87488  |           |           |           |
| H | -0.72803 | -0.83001 | -2.43098 |           |           |           |
| H | 0.65642  | -1.44110 | 0.19920  |           |           |           |
| H | 1.84127  | -0.23385 | -1.76745 |           |           |           |

#### Statistical Thermodynamic Analysis

Temperature=373.15 K

Pressure=1 atm

Zero-point correction= 0.395871

Electronic Energy = -1578.30912445

Internal Energy (E)= -1577.87201745

Enthalpy (H)= -1577.87083545

Gibbs Free Energy (G)=-1577.99844345

Gibbs Free Energy of Solvation=-1577.92691342

| St.Pt. | General Structure            | Ball & Stick model |
|--------|------------------------------|--------------------|
| VI     |                              |                    |
|        | <b>Cartesian co-ordinate</b> | <b>Frequencies</b> |

| Atoms | X        | Y        | Z        |           |           |           |
|-------|----------|----------|----------|-----------|-----------|-----------|
| F     | -1.01560 | -3.32526 | -2.78864 | 17.0464   | 17.9415   | 31.0234   |
| O     | -0.51894 | 0.84328  | 1.37103  | 38.5408   | 45.2839   | 53.7071   |
| F     | 1.01780  | -2.81035 | -2.19834 | 56.0052   | 57.1100   | 72.6274   |
| O     | -3.11758 | -1.83077 | -1.31017 | 80.9530   | 87.4428   | 93.3673   |
| F     | -0.37800 | -3.60429 | -0.72249 | 114.6232  | 128.5130  | 150.8126  |
| N     | 0.94661  | 1.61398  | -1.30241 | 169.3934  | 198.4161  | 203.1475  |
| N     | -2.08362 | -0.42084 | 0.21321  | 210.1300  | 239.1631  | 256.8821  |
| N     | 2.46624  | 1.86236  | 0.37794  | 267.9829  | 288.4277  | 310.5119  |
| C     | 0.18741  | -0.66890 | -0.42186 | 314.4177  | 336.0229  | 377.2680  |
| C     | -0.80268 | 0.03926  | 0.50824  | 407.5424  | 412.0594  | 418.3232  |
| C     | 1.34510  | 0.23966  | -0.91416 | 419.4886  | 466.5760  | 487.6172  |
| C     | 2.36568  | 0.57802  | 0.17902  | 497.7437  | 503.7304  | 511.4577  |
| C     | -0.70662 | -1.35973 | -1.47517 | 530.1258  | 530.6442  | 547.7264  |
| C     | 3.14463  | -0.40737 | 0.91485  | 567.2813  | 606.5916  | 615.3715  |
| C     | 0.11806  | 2.01298  | -2.29678 | 621.1899  | 628.4306  | 629.5060  |
| H     | -0.33516 | 1.25601  | -2.92093 | 631.1001  | 653.0341  | 665.3837  |
| C     | -2.12757 | -1.27937 | -0.88588 | 689.2002  | 695.7355  | 704.6364  |
| C     | -3.25436 | -0.04381 | 0.96638  | 723.8481  | 739.2704  | 761.5308  |
| C     | 1.61464  | 2.49875  | -0.49757 | 771.9751  | 785.2929  | 788.0734  |
| C     | 1.43029  | 3.88203  | -0.63439 | 804.9577  | 839.7218  | 852.7699  |
| C     | -0.28253 | -2.78859 | -1.79803 | 858.5073  | 879.6238  | 888.7426  |
| C     | 3.33557  | -1.71458 | 0.42178  | 911.3968  | 912.9265  | 939.1396  |
| H     | 2.91746  | -2.01622 | -0.53290 | 939.7189  | 957.5277  | 966.8463  |
| C     | 2.16441  | 4.84054  | 0.26037  | 990.5872  | 1000.9888 | 1001.5572 |
| H     | 3.24685  | 4.71414  | 0.16040  | 1010.5603 | 1011.3733 | 1015.8487 |
| H     | 1.91237  | 4.66292  | 1.31041  | 1016.3053 | 1022.7133 | 1034.7622 |
| H     | 1.90811  | 5.87113  | 0.00902  | 1047.0601 | 1055.6486 | 1058.3515 |
| C     | 0.55118  | 4.28884  | -1.63928 | 1067.8918 | 1084.5778 | 1096.6522 |
| H     | 0.37471  | 5.34932  | -1.78797 | 1102.1680 | 1113.8222 | 1117.3836 |
| C     | 3.73878  | -0.03726 | 2.14039  | 1122.5593 | 1153.1003 | 1183.7687 |
| H     | 3.58518  | 0.96608  | 2.52134  | 1186.9642 | 1188.3773 | 1199.0472 |
| C     | -0.09786 | 3.36416  | -2.47336 | 1202.8326 | 1207.0771 | 1216.1055 |
| H     | -0.76219 | 3.69357  | -3.26229 | 1223.5644 | 1236.4575 | 1253.4874 |
| C     | -3.55508 | -0.72726 | 2.14591  | 1260.3971 | 1277.0841 | 1291.8747 |
| H     | -2.91260 | -1.53279 | 2.48645  | 1294.9493 | 1311.6935 | 1335.6130 |
| C     | -4.06309 | 0.99337  | 0.49824  | 1338.4862 | 1351.1921 | 1356.3031 |
| H     | -3.80778 | 1.50888  | -0.42197 | 1356.8727 | 1365.9654 | 1370.8731 |
| C     | 4.10436  | -2.62868 | 1.13965  | 1398.8094 | 1403.1061 | 1420.9239 |
| H     | 4.25510  | -3.62906 | 0.74764  | 1457.8668 | 1472.1518 | 1479.4662 |
| C     | -5.51029 | 0.67746  | 2.41507  | 1486.7877 | 1495.2276 | 1520.1288 |
| H     | -6.39258 | 0.95913  | 2.98136  | 1528.8071 | 1532.3245 | 1580.4694 |
| C     | -4.69027 | -0.35914 | 2.87202  | 1617.5776 | 1625.8338 | 1637.3905 |
| H     | -4.93294 | -0.88383 | 3.79052  | 1642.0163 | 1643.6651 | 1662.1116 |
| C     | 4.49812  | -0.95772 | 2.85460  | 1762.9075 | 1845.2291 | 3057.1968 |
| H     | 4.94484  | -0.66947 | 3.80063  | 3073.5179 | 3092.6959 | 3113.6003 |
| C     | 4.68238  | -2.25434 | 2.35684  | 3119.0694 | 3150.7694 | 3194.8194 |
| H     | 5.27644  | -2.97013 | 2.91645  | 3198.3375 | 3202.3510 | 3205.4144 |
| C     | -5.19759 | 1.35168  | 1.23033  | 3208.3708 | 3211.9445 | 3214.9940 |
| H     | -5.83389 | 2.15583  | 0.87488  | 3215.9161 | 3220.0327 | 3220.3456 |
| H     | -0.72803 | -0.83001 | -2.43098 | 3227.1721 | 3245.5732 | 3270.1260 |
| H     | 0.65642  | -1.44110 | 0.19920  |           |           |           |
| H     | 1.84127  | -0.23385 | -1.76745 |           |           |           |

**Statistical Thermodynamic Analysis**



|   |          |          |          |           |           |           |
|---|----------|----------|----------|-----------|-----------|-----------|
| C | -1.99634 | 4.41500  | 0.56604  | 1184.9863 | 1190.0958 | 1197.9191 |
| H | -2.25167 | 5.46301  | 0.68824  | 1200.2102 | 1204.1503 | 1215.8181 |
| C | -3.69507 | -1.34502 | -2.05669 | 1236.8043 | 1253.6281 | 1264.8155 |
| H | -3.89776 | -0.43029 | -2.60424 | 1276.7193 | 1284.0482 | 1317.2725 |
| C | -0.67154 | 3.98580  | 0.85487  | 1334.6382 | 1337.7425 | 1356.3100 |
| H | 0.07798  | 4.69576  | 1.18432  | 1358.8392 | 1371.6043 | 1382.2795 |
| C | 4.24089  | -0.96946 | -1.47877 | 1391.8354 | 1398.4108 | 1413.9493 |
| H | 3.72853  | -1.92416 | -1.53996 | 1418.9106 | 1463.3804 | 1469.5923 |
| C | 4.30514  | 1.32336  | -0.66405 | 1477.0853 | 1485.8614 | 1491.4815 |
| H | 3.84117  | 2.12807  | -0.10298 | 1521.1217 | 1528.8239 | 1529.7419 |
| C | -3.17002 | -3.69361 | -0.64292 | 1574.3261 | 1595.4444 | 1621.2377 |
| H | -2.97405 | -4.60138 | -0.07976 | 1636.7613 | 1642.7141 | 1649.8851 |
| C | 6.12016  | 0.46136  | -2.01736 | 1670.5539 | 1756.0064 | 1836.6557 |
| H | 7.07753  | 0.60878  | -2.50767 | 3043.6611 | 3072.0709 | 3097.7963 |
| C | 5.47231  | -0.77469 | -2.10908 | 3099.4301 | 3133.9128 | 3184.1173 |
| H | 5.92335  | -1.58798 | -2.66872 | 3192.5876 | 3193.1161 | 3201.1645 |
| C | -4.16614 | -2.56825 | -2.53514 | 3201.3724 | 3203.9611 | 3207.7201 |
| H | -4.73735 | -2.60039 | -3.45845 | 3211.8525 | 3214.5722 | 3219.2179 |
| C | -3.90128 | -3.74916 | -1.83228 | 3227.3768 | 3227.4385 | 3264.0720 |
| H | -4.26739 | -4.70124 | -2.20499 |           |           |           |
| C | 5.53758  | 1.50794  | -1.29552 |           |           |           |
| H | 6.03891  | 2.46797  | -1.22388 |           |           |           |
| H | 0.56706  | 0.41352  | 2.17774  |           |           |           |
| H | -0.19794 | -1.42884 | -0.12129 |           |           |           |
| H | 1.84127  | -0.23385 | -1.76745 |           |           |           |

#### Statistical Thermodynamic Analysis

Temperature=373.15 K

Pressure=1 atm

Zero-point correction= 0.382956

Electronic Energy = -1577.88607903

Internal Energy (E)= -1577.46212303

Enthalpy (H)= -1577.46094203

Gibbs Free Energy (G)=-1577.58816603

Gibbs Free Energy of Solvation=-1577.56736877

| St.Pt.                       | General Structure | Ball & Stick model |         |         |
|------------------------------|-------------------|--------------------|---------|---------|
| 3ba                          |                   |                    |         |         |
| <b>Cartesian co-ordinate</b> |                   | <b>Frequencies</b> |         |         |
| -----                        |                   |                    |         |         |
| Atoms                        | X                 | Y                  | Z       |         |
| -----                        |                   |                    |         |         |
|                              |                   | 18.0711            | 20.5340 | 31.9157 |
|                              |                   | 36.2504            | 48.2713 | 51.6377 |
|                              |                   | 55.3903            | 64.7396 | 71.6857 |

|   |          |          |          |           |           |           |
|---|----------|----------|----------|-----------|-----------|-----------|
| F | 0.26656  | -3.78911 | 1.17537  | 83.5022   | 107.5791  | 121.0982  |
| O | -1.14825 | 1.12645  | -1.35398 | 125.9346  | 143.3735  | 161.0673  |
| F | 1.50511  | -2.15404 | 1.91841  | 177.2778  | 196.3227  | 214.2103  |
| O | -2.71244 | -2.47840 | 1.01310  | 226.0767  | 239.0952  | 260.7668  |
| F | -0.40278 | -2.59400 | 2.86860  | 270.0745  | 287.6936  | 305.8162  |
| N | 2.44051  | -0.73185 | -0.55189 | 323.1058  | 341.2687  | 347.6496  |
| N | -2.30243 | -0.54904 | -0.23005 | 384.1388  | 415.5310  | 419.0912  |
| N | 3.14601  | 1.40539  | -0.37647 | 425.3715  | 443.2829  | 493.2453  |
| C | 0.02312  | -0.48627 | 0.08858  | 497.9293  | 508.7027  | 521.5025  |
| C | -1.17453 | 0.18302  | -0.59132 | 524.0559  | 538.1320  | 552.2547  |
| C | 1.34747  | 0.02926  | -0.12150 | 578.4646  | 591.3437  | 626.1537  |
| C | 1.83845  | 1.34844  | -0.02583 | 627.3327  | 628.8943  | 635.8297  |
| C | -0.46602 | -1.57158 | 0.74846  | 640.8805  | 666.0559  | 699.3292  |
| C | 1.13705  | 2.54270  | 0.47487  | 702.9145  | 705.9662  | 722.7041  |
| C | 2.54197  | -2.05592 | -0.90153 | 737.6734  | 759.5559  | 762.6714  |
| H | 1.65930  | -2.66978 | -0.79636 | 769.2632  | 775.0600  | 785.4821  |
| C | -1.94202 | -1.64823 | 0.56712  | 792.0683  | 807.0306  | 837.6265  |
| C | -3.63587 | -0.26806 | -0.67655 | 851.8828  | 858.6350  | 861.0688  |
| C | 3.50484  | 0.15691  | -0.71172 | 895.6238  | 906.0090  | 936.2579  |
| C | 4.75704  | -0.31112 | -1.18850 | 939.6846  | 967.1284  | 968.8684  |
| C | 0.22625  | -2.52116 | 1.67104  | 985.8107  | 988.7481  | 991.2592  |
| C | 0.19701  | 2.46156  | 1.51719  | 1009.9994 | 1011.6682 | 1012.1386 |
| H | -0.01152 | 1.50613  | 1.98851  | 1015.8029 | 1038.8966 | 1047.6959 |
| C | 5.89605  | 0.65890  | -1.33931 | 1055.5836 | 1063.1947 | 1084.8260 |
| H | 6.13783  | 1.13248  | -0.38172 | 1089.8710 | 1099.1955 | 1102.1008 |
| H | 5.63633  | 1.46324  | -2.03597 | 1105.7350 | 1135.0307 | 1155.3195 |
| H | 6.78794  | 0.15023  | -1.71202 | 1168.0890 | 1180.2402 | 1181.3632 |
| C | 4.85219  | -1.65261 | -1.50496 | 1189.2722 | 1195.1823 | 1198.7455 |
| H | 5.79307  | -2.04900 | -1.87356 | 1200.7973 | 1234.8076 | 1283.5646 |
| C | 1.43699  | 3.80286  | -0.07285 | 1286.6807 | 1322.9082 | 1338.1879 |
| H | 2.16838  | 3.87201  | -0.87128 | 1342.7872 | 1356.6034 | 1358.0448 |
| C | 3.73872  | -2.52308 | -1.37205 | 1362.3959 | 1382.7104 | 1407.9110 |
| H | 3.82121  | -3.56912 | -1.64206 | 1418.8771 | 1437.1101 | 1461.5794 |
| C | -4.28266 | 0.88531  | -0.22445 | 1470.2506 | 1477.0996 | 1486.1197 |
| H | -3.77687 | 1.55420  | 0.46406  | 1492.1559 | 1501.6582 | 1523.6361 |
| C | -4.26898 | -1.14870 | -1.55801 | 1531.4848 | 1548.9996 | 1598.8301 |
| H | -3.74936 | -2.03656 | -1.90282 | 1620.7836 | 1635.2812 | 1643.2755 |
| C | -0.44574 | 3.61065  | 1.98330  | 1647.0821 | 1654.6329 | 1668.2901 |
| H | -1.16453 | 3.53235  | 2.79353  | 1746.6240 | 1815.3573 | 3045.6890 |
| C | -6.22372 | 0.28327  | -1.54378 | 3102.4127 | 3136.7682 | 3185.5046 |
| H | -7.23295 | 0.49800  | -1.88158 | 3191.3921 | 3192.4425 | 3199.8733 |
| C | -5.57836 | 1.16157  | -0.66744 | 3200.8759 | 3204.0912 | 3207.2503 |
| H | -6.08338 | 2.05826  | -0.32216 | 3208.7557 | 3214.3511 | 3214.6464 |
| C | 0.79230  | 4.94847  | 0.39313  | 3218.3668 | 3230.8312 | 3269.0713 |
| H | 1.02604  | 5.91364  | -0.04651 |           |           |           |
| C | -0.15401 | 4.85652  | 1.42076  |           |           |           |
| H | -0.65362 | 5.74963  | 1.78408  |           |           |           |
| C | -5.56980 | -0.87152 | -1.98518 |           |           |           |
| H | -6.06743 | -1.55465 | -2.66640 |           |           |           |
| H | 0.56706  | 0.41352  | 2.17774  |           |           |           |
| H | -0.19794 | -1.42884 | -0.12129 |           |           |           |
| H | 1.84127  | -0.23385 | -1.76745 |           |           |           |

### Statistical Thermodynamic Analysis

Temperature=373.15 K

Pressure=1 atm

Zero-point correction= 0.358756

Electronic Energy = -1576.65655713

Internal Energy (E)= -1576.25716213

Enthalpy (H)= -1576.25598013



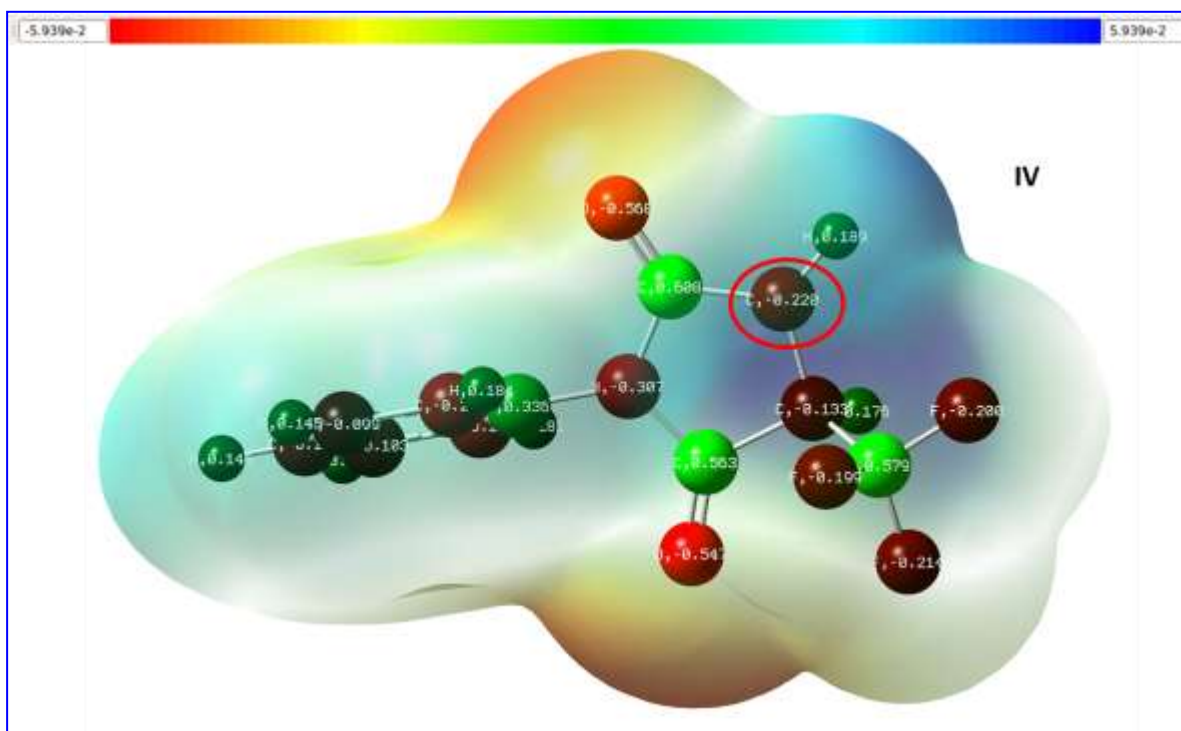

**Figure 2:** Merz Kollman Charges and Electron density mapped over electrostatic potential surface of intermediate **IV** and **1b** (DFT, Functional UB3LYP, Basis 6-31+G(d,p))

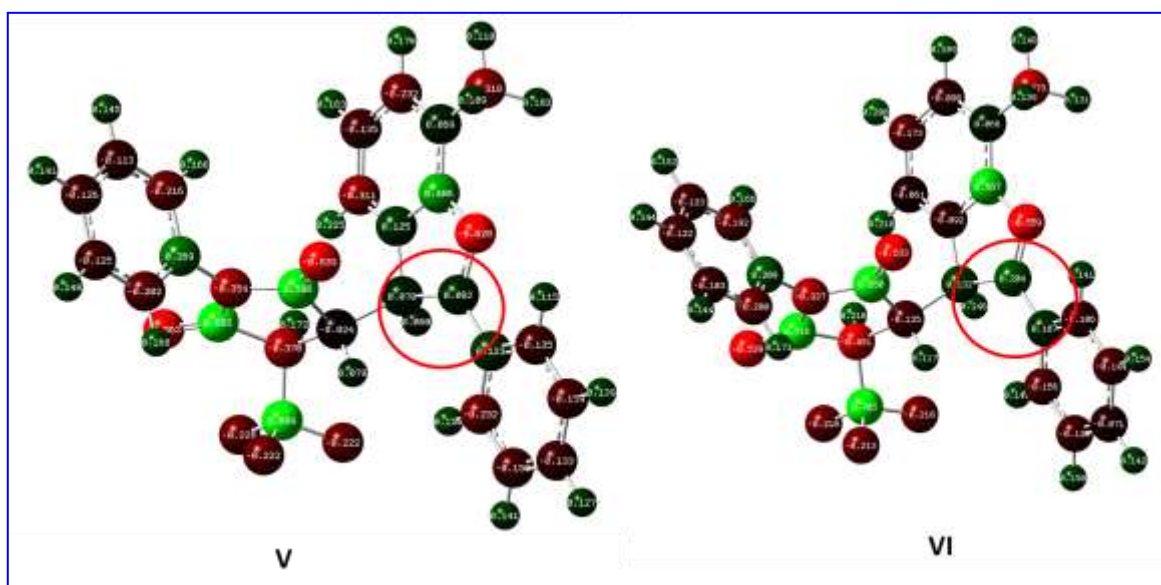

**Figure 3:** Increase in Merz Kollman charges from radical intermediate **V** to cationic intermediate **VI**, (DFT, Functional UB3LYP, Basis-6-31+G(d,p)). Increase in charge signifies single electron transfer.



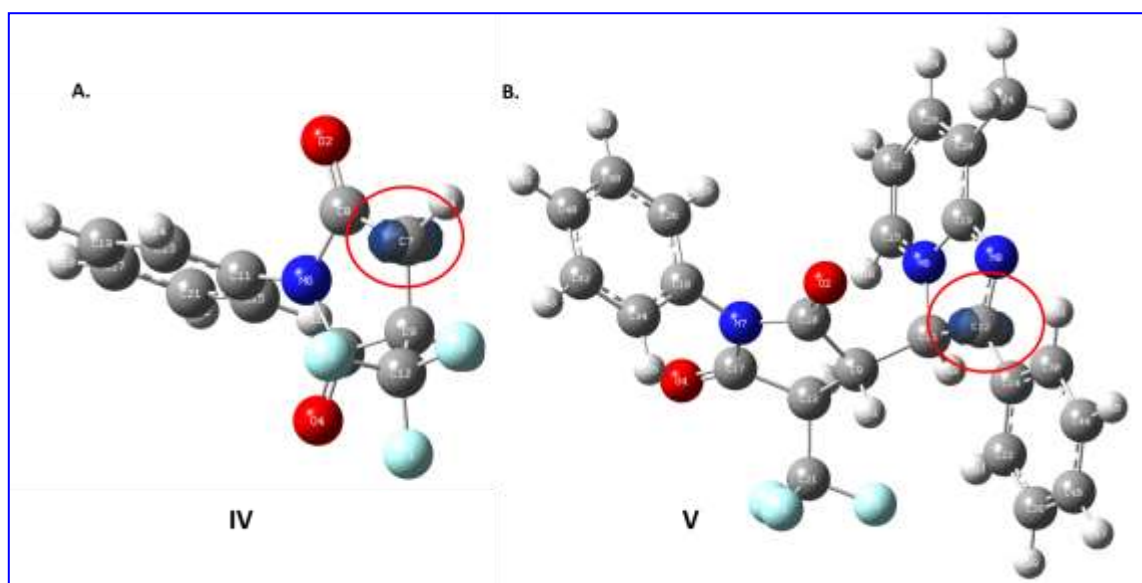

**Figure 4:** Spin density calculation for intermediate **IV** (iso value 0.05) and **V** (iso value 0.03), DFT-NBO calculation, Functional UB3LYP, Basis-6-31+G(d,p). Spin density signifies localization of the radical.

## 9. References:

- (1) (a) A. K. Bagdi, M. Rahman, S. Santra, A. Majee and A. Hajra, *Adv. Synth. Catal.*, 2013, **355**, 1741-1747; (b) B. S. Santaniello, M. J. Price and J. K. Murray Jr, *J. Chem. Educ.*, 2017, **94**, 388-391.
- (2) (a) G. B. Deshmukh, N. S. Patil, V. B. Gaikwad, A. D. Bhole and S. V. Patil, *J. Chem. Pharm. Res.*, 2014, **6**, 393-399; (b) A. K. Ghosh, S. Samanta, P. Ghosh, S. Neogi and A. Hajra, *Org. Biomol. Chem.*, 2020, **18**, 3093-3097.
- (3) Gaussian 16, Revision C.01, M. J. Frisch, G. W. Trucks, H. B. Schlegel, G. E. Scuseria, M. A. Robb, J. R. Cheeseman, G. Scalmani, V. Barone, G. A. Petersson, H. Nakatsuji, X. Li, M. Caricato, A. V. Marenich, J. Bloino, B. G. Janesko, R. Gomperts, B. Mennucci, H. P. Hratchian, J. V. Ortiz, A. F. Izmaylov, J. L. Sonnenberg, D. Williams-Young, F. Ding, F. Lipparini, F. Egidi, J. Goings, B. Peng, A. Petrone, T. Henderson, D. Ranasinghe, V. G. Zakrzewski, J. Gao, N. Rega, G. Zheng, W. Liang, M. Hada, M. Ehara, K. Toyota, R. Fukuda, J. Hasegawa, M. Ishida, T. Nakajima, Y. Honda, O. Kitao, H. Nakai, T. Vreven, K. Throssell, J. A. Montgomery, Jr., J. E. Peralta, F. Ogliaro, M. J. Bearpark, J. J. Heyd, E. N. Brothers, K. N. Kudin, V. N. Staroverov, T. A. Keith, R. Kobayashi, J. Normand, K. Raghavachari, A. P. Rendell, J. C. Burant, S. S. Iyengar, J. Tomasi, M. Cossi, J. M. Millam, M. Klene, C. Adamo, R. Cammi, J. W. Ochterski, R. L. Martin, K. Morokuma, O. Farkas, J. B. Foresman, and D. J. Fox, Gaussian, Inc., Wallingford CT, 2016.
- (4) A. D. Becke, *J. Chem. Phys.*, 1993, **98**, 5648-5652.
- (5) J. Tomasi and M. Persico, *Chem. Rev.*, 1994, **94**, 2027-2094.

## 10. NMR spectra [ $^1\text{H}$ , $^{13}\text{C}\{^1\text{H}\}$ and $^{19}\text{F}$ ] of synthesized products

8.086  
8.068  
7.794  
7.772  
7.687  
7.657  
7.641  
7.638  
7.471  
7.468  
7.456  
7.451  
7.442  
7.439  
7.434  
7.426  
7.416  
7.410  
7.391  
7.372  
7.363  
7.350  
7.331  
7.259  
7.023  
7.021  
7.006  
7.004  
6.988  
6.986

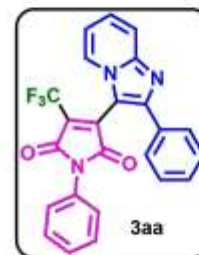

<sup>1</sup>H NMR: 400 MHz  
Solvent: CDCl<sub>3</sub>

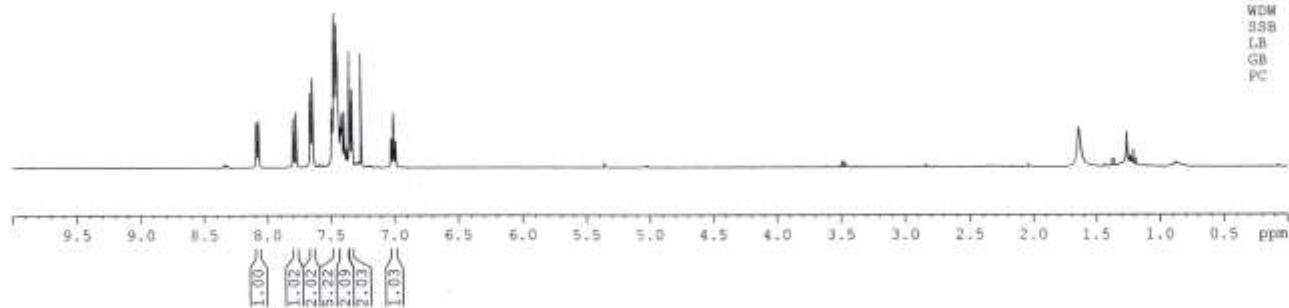

Current Data Parameters  
NAME Dr. A HAJRA 2022 1H  
EXPNO 436  
PROCNO 1

F2 - Acquisition Parameters  
Date\_ 20220417  
Time 12.29  
INSTRUM spect  
PROBHD 5 mm PABBO BB/  
PULPROG zg30  
TD 32768  
SOLVENT CDCl3  
NS 8  
DS 2  
SWH 8223.685 Kz  
FIDRES 0.250967 Kz  
AQ 1.9922944 sec  
RG 168.31  
DM 50.800 usec  
DE 6.50 usec  
TE 300.0 K  
D1 1.80000000 sec  
TDO 1

----- CHANNEL f1 -----  
SFO1 400.1524711 MHz  
NUC1 1H  
P1 14.75 usec  
FLW1 12.00000000 W

F2 - Processing parameters  
SI 16384  
SF 400.1500087 MHz  
WDW EM  
SSB 0  
LB 0.30 Hz  
GB 0  
PC 1.00

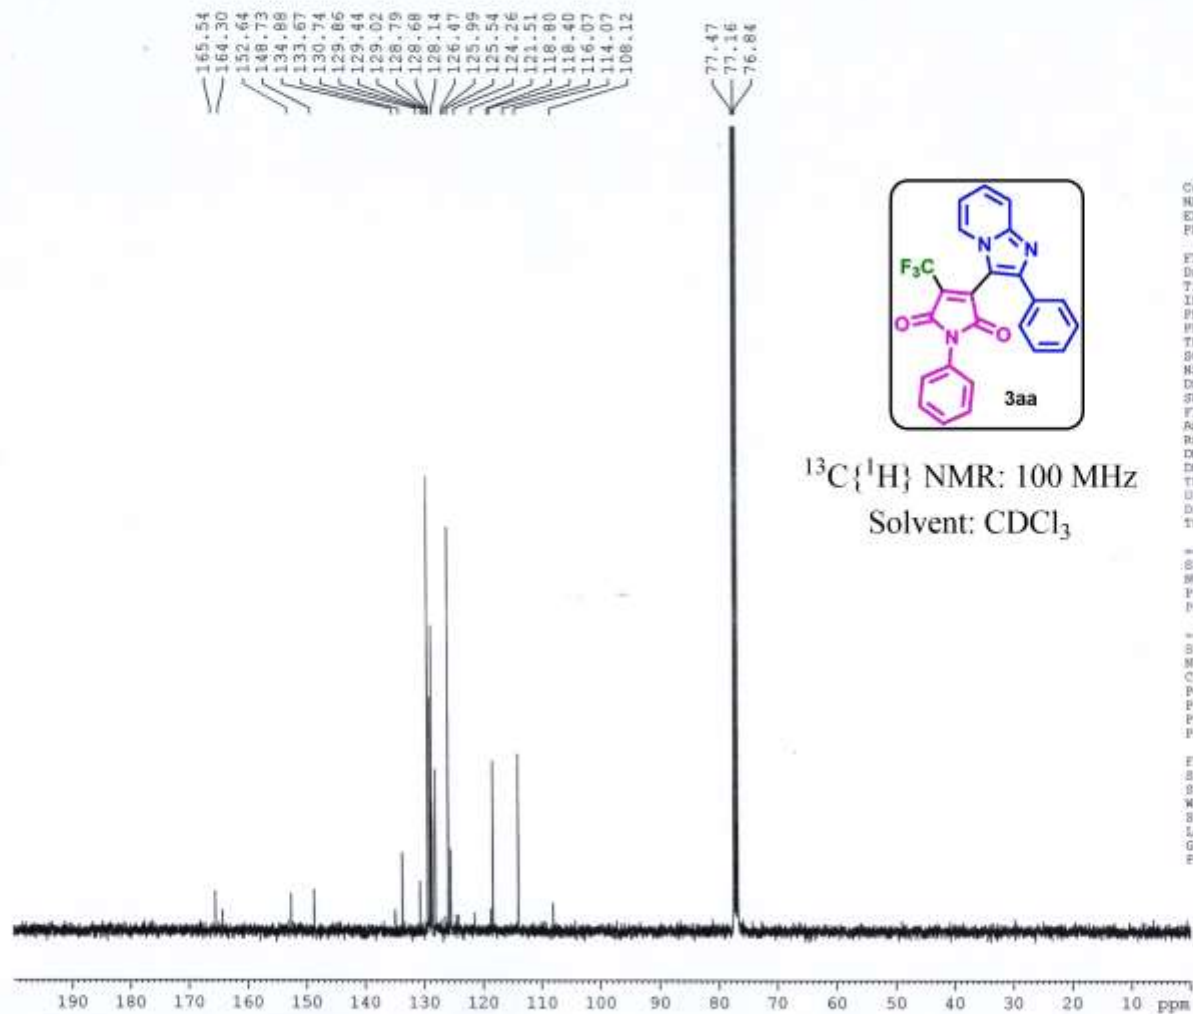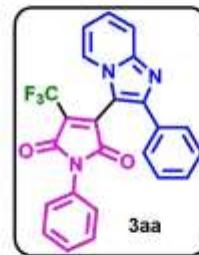

Current Data Parameters  
 NAME Dr. A HAJRA-2022-13C  
 EXPNO 171  
 PROCNO 1

F2 - Acquisition Parameters  
 Date\_ 20220418  
 Time 10.23  
 INSTRUM spect  
 PROBR0 5 mm PABBO BB/  
 PULPROG zgpg30  
 TD 32768  
 SOLVENT CDCl3  
 NS 1024  
 DS 2  
 SWH 24036.461 Hz  
 FIDRES 0.733596 Hz  
 AQ 0.6815744 sec  
 RG 186.42  
 DW 20.800 usec  
 DE 6.90 usec  
 TE 301.6 K  
 UL 1.00000000 sec  
 D11 0.03000000 sec  
 TDO 1

----- CHANNEL f1 -----  
 SFO1 100.6278588 MHz  
 NUC1 13C  
 P1 8.90 usec  
 PLW1 54.00000000 W

----- CHANNEL f2 -----  
 SFO2 400.1516006 MHz  
 NUC2 1H  
 CDPDPRG2 waltz16  
 PCPD2 80.00 usec  
 PLW2 12.00000000 W  
 PLW12 0.32231000 W  
 PLW13 0.16212000 W

F2 - Processing parameters  
 SI 16384  
 SF 100.6177829 MHz  
 WDW EM  
 SSB 0  
 LB 1.00 Hz  
 GB 0  
 EC 1.40

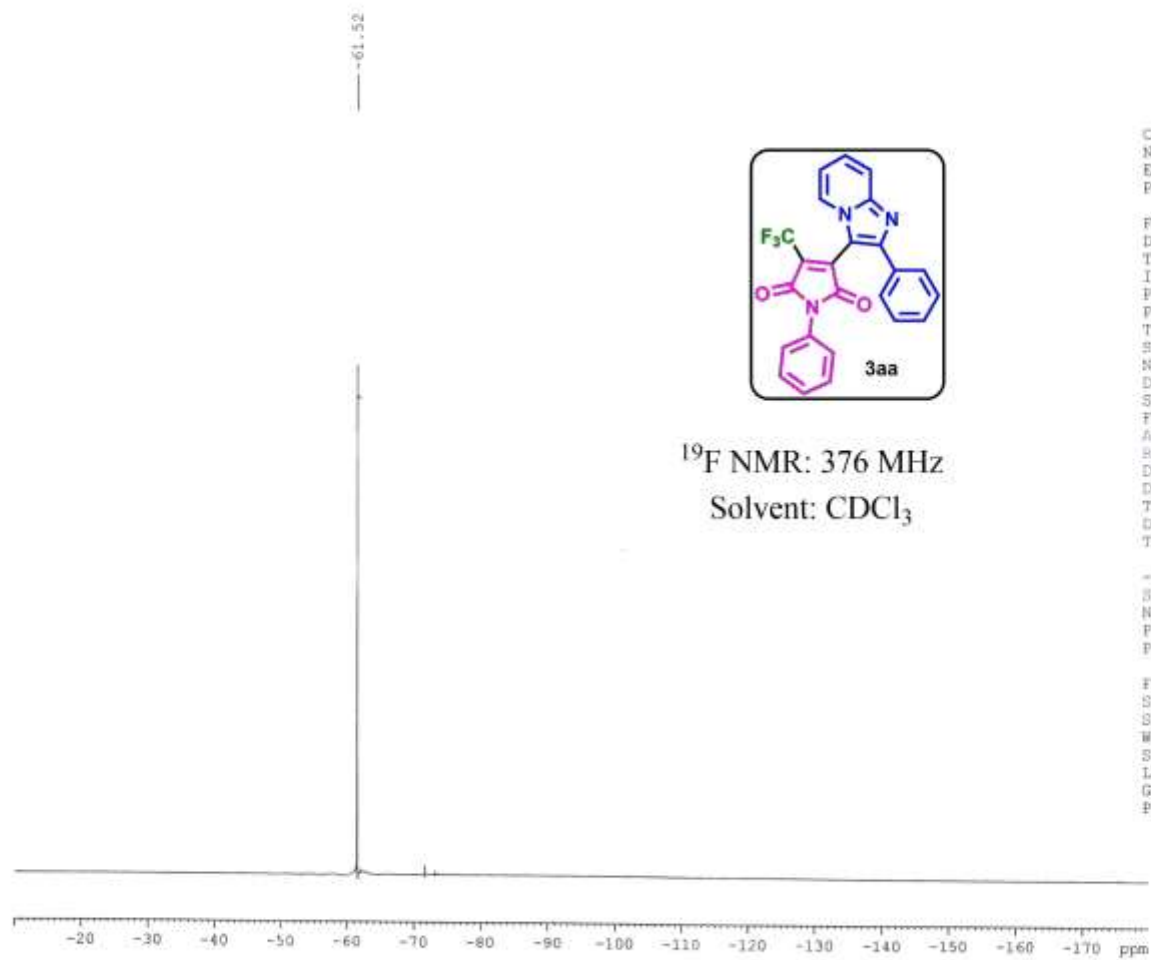

Current Data Parameters  
 NAME Dr. A HAJRA 2022 1H  
 EXPNO 437  
 PROCNO 1

F2 - Acquisition Parameters  
 Date 20220417  
 Time 12.33  
 INSTRUM spect  
 PROBHD 5 mm PABBO BB/  
 PULPROG zgpg30  
 TD 32768  
 SOLVENT CDCl3  
 NS 8  
 DS 2  
 SWH 89285.711 Hz  
 FIDRES 2.724784 Hz  
 AQ 0.1835008 sec  
 RG 168.31  
 DW 5.600 usec  
 DE 6.50 usec  
 TE 300.7 K  
 D1 1.00000000 sec  
 TDO 1

----- CHANNEL f1 -----  
 SFO1 376.4795333 MHz  
 NUC1 19F  
 P1 12.50 usec  
 PLW1 20.00000000 W

F2 - Processing parameters  
 SI 16384  
 SF 376.5171850 MHz  
 WDW EM  
 SSB 0  
 LB 0.30 Hz  
 GB 0  
 PC 1.00

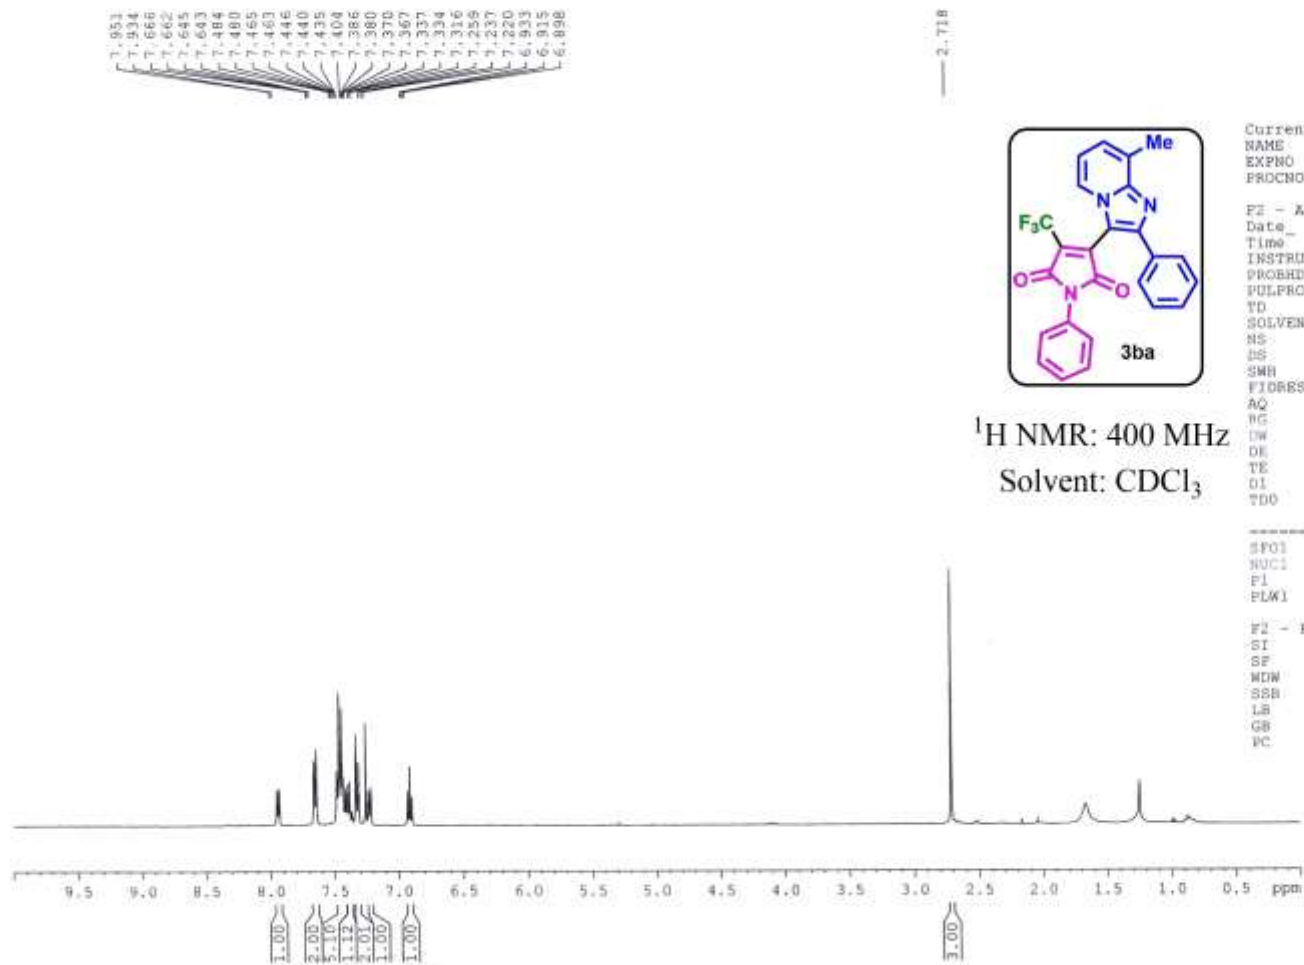

Current Data Parameters  
 NAME Dr. A HAJRA 2022 IH  
 EXPNO 137  
 PROCNO 1

F2 - Acquisition Parameters  
 Date\_ 20220216  
 Time\_ 22.12  
 INSTRUM spect  
 PROBHD 5 mm DABBO BB/  
 PULPROG zg30  
 VD 32768  
 SOLVENT CDCl3  
 NS 8  
 DS 2  
 SWH 8223.685 Hz  
 FIDRES 0.250967 Hz  
 AQ 1.9982944 sec  
 RG 186.47  
 DW 63.800 usec  
 DE 6.30 usec  
 TE 290.5 F  
 D1 1.00000000 sec  
 TDO 1

----- CHANNEL f1 -----  
 SFO1 400.1524711 MHz  
 NUC1 1H  
 P1 14.75 usec  
 PLW1 12.00000000 W

F2 - Processing parameters  
 SI 16384  
 SF 400.1500086 MHz  
 MDW EM  
 SSB 0  
 LB 0.30 Hz  
 GB 0  
 VC 1.00

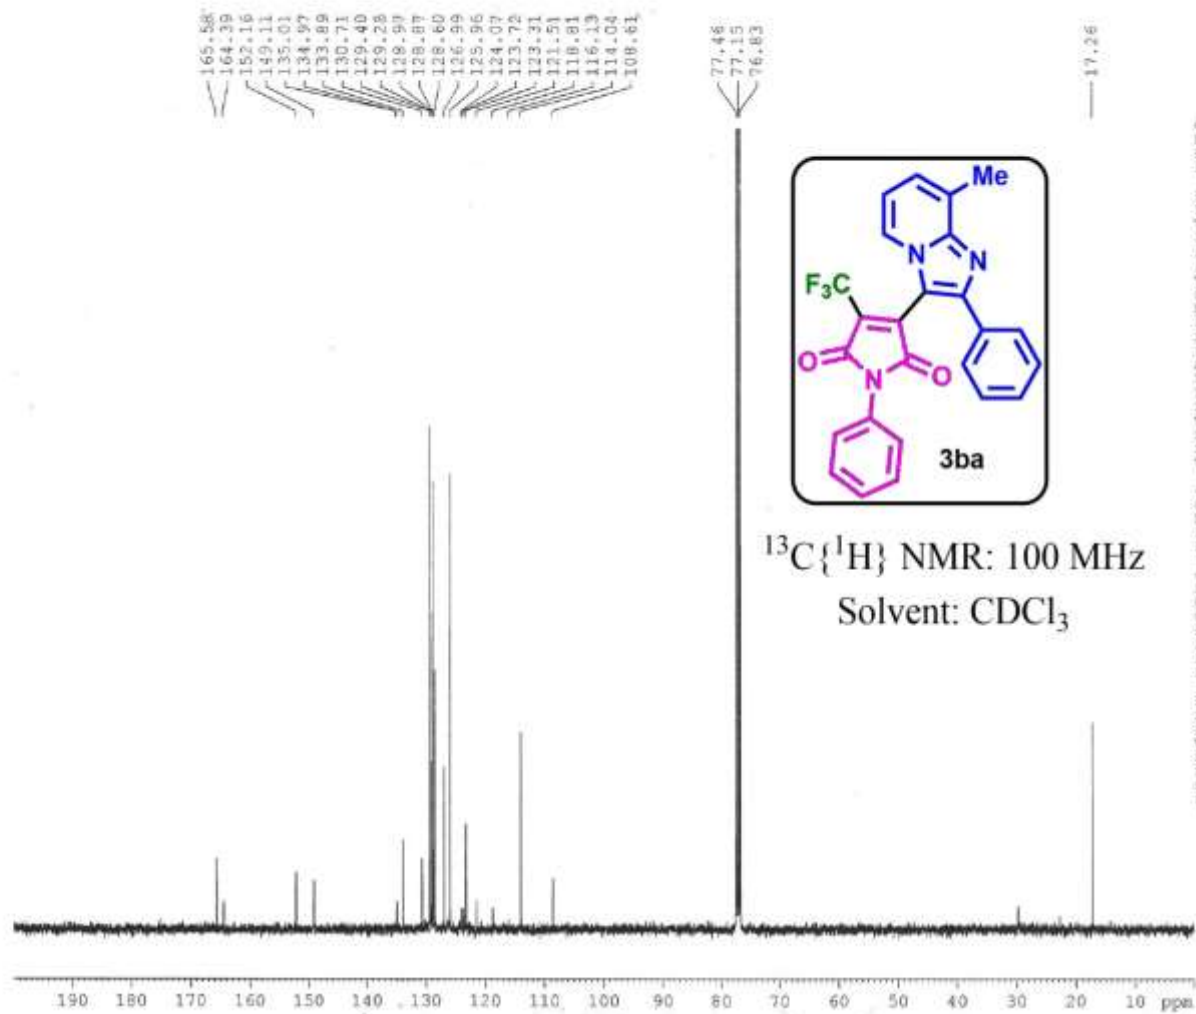

Current Date Parameters  
NAME: Dr. A HRWR-2022-13C  
EXPHO: 7E  
PROCNO: 1

F2 - Acquisition Parameters  
Date\_: 20220303  
Time: 2.18  
INSTRON: spect  
PROBHD: 5 mm PABBO mm/  
PULPROG: zgpg30  
TD: 32768  
SOLVENT: CDCl3  
NS: 1024  
DS: 0  
SWH: 24038.463 Hz  
FIDRES: 0.732596 Hz  
AQ: 0.6815744 sec  
RG: 182.42  
BW: 20.400 umsc  
DE: 6.50 umsc  
TE: 295.0 K  
D1: 2.00000000 sec  
d11: 0.03000000 sec  
TD0: 1

----- CHANNEL f1 -----  
SFO1: 100.6278588 MHz  
NUC1: 13C  
P1: 8.90 umsc  
PCW1: 14.00000000 W

----- CHANNEL f2 -----  
SFO2: 400.1514006 MHz  
NUC2: 1H  
CROSSP2: waltz16  
PCPD2: 90.00 umsc  
PCW2: 12.00000000 W  
PCW3: 0.32231000 W  
PCW4: 0.16232000 W

F2 - Processing parameters  
SI: 14284  
SF: 100.6177674 MHz  
WDW: EM  
SSB: 0  
LA: 1.00 Hz  
GB: 0  
PC: 1.40



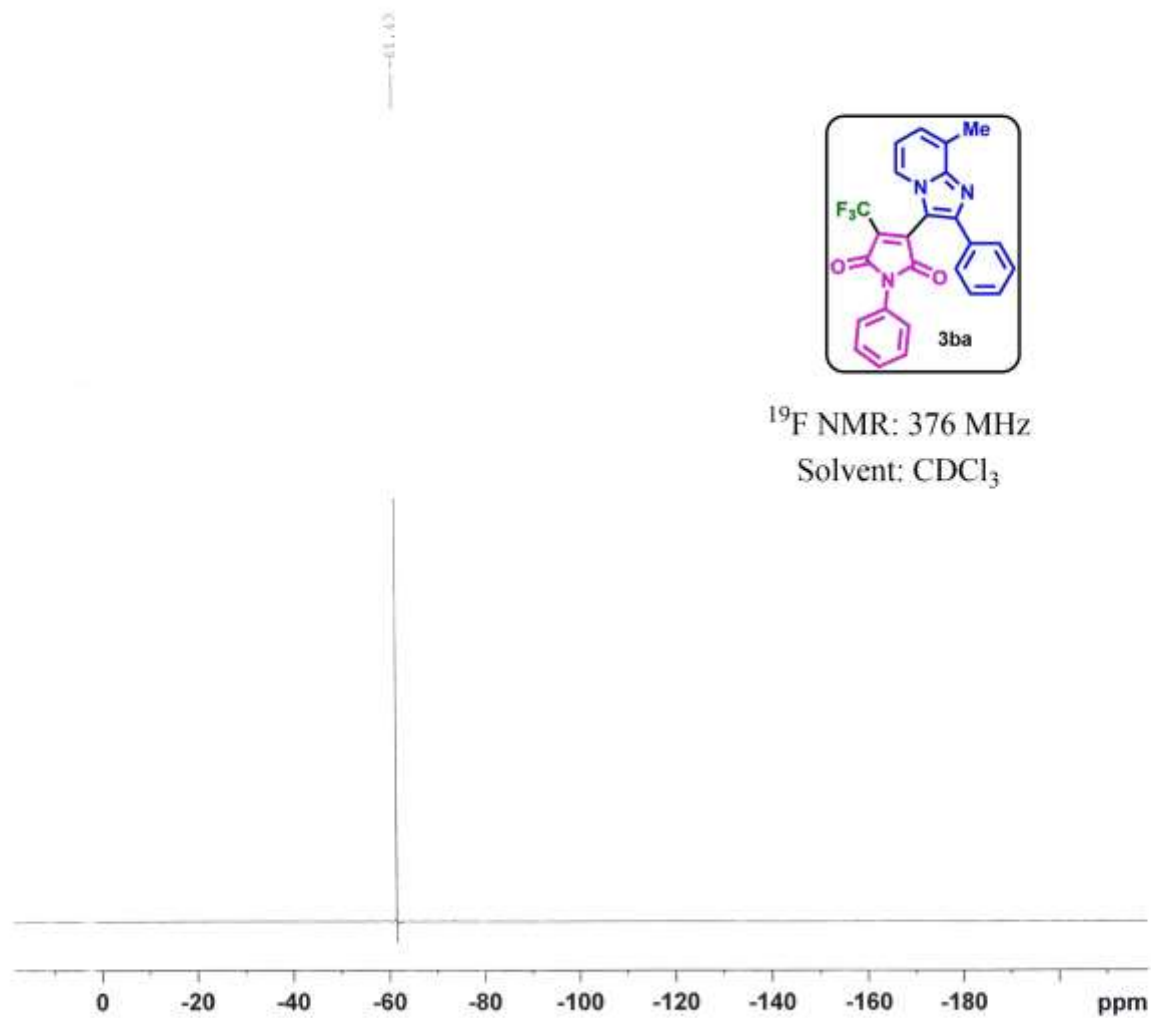

Current Data Parameters  
 NAME Dr. A HAJRA 2022 1H  
 EXPNO 138  
 PROCNO 1

F2 - Acquisition Parameters  
 Date\_ 20220216  
 Time 22.14  
 INSTRUM spect  
 PROBHD 5 mm PABBO BB/  
 PULPROG zgpg30  
 TD 32768  
 SOLVENT CDCl3  
 NS 4  
 DS 2  
 SWH 89285.711 Hz  
 FIDRES 2.1724784 Hz  
 AQ 0.1835008 sec  
 RG 196.42  
 UW 5.600 usec  
 DE 6.50 usec  
 TE 290.5 K  
 D1 1.00000000 sec  
 TD0 1

===== CHANNEL f1 =====  
 SFO1 376.4795133 MHz  
 NUCL1 19F  
 P1 12.50 usec  
 PLW1 20.00000000 W

F2 - Processing parameters  
 SI 16384  
 SF 376.5171850 MHz  
 WDW EM  
 SSB 0  
 LB 0.30 Hz  
 GB 0  
 PC 1.00

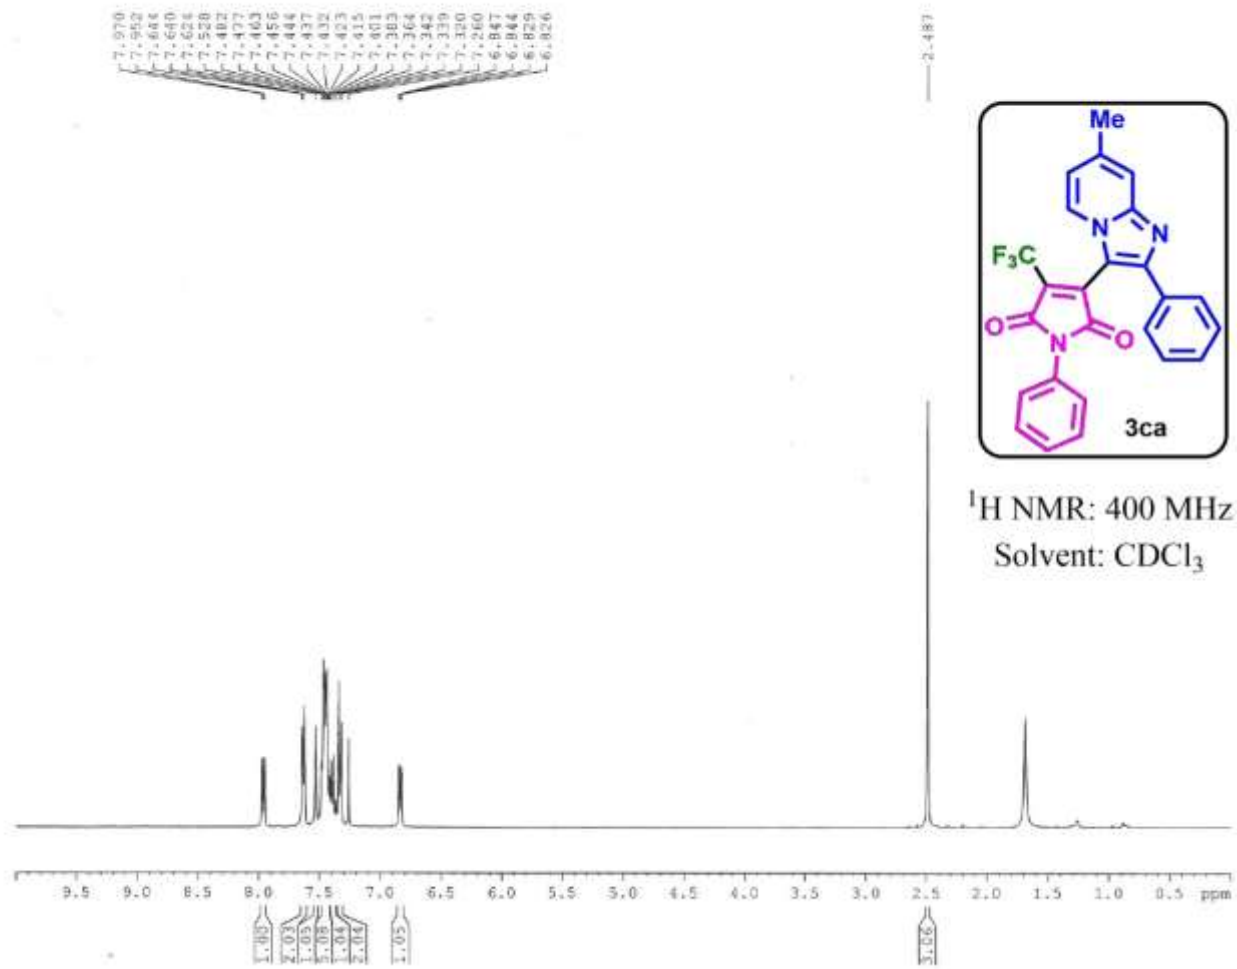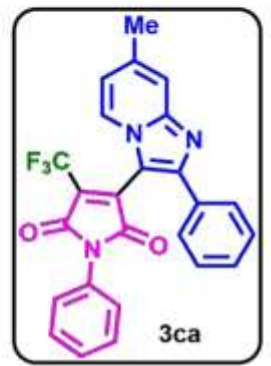

<sup>1</sup>H NMR: 400 MHz  
Solvent: CDCl<sub>3</sub>

Current Data Parameters  
NAME Dr. R HAJRA 2022 1H  
EXPNO 587  
PROCNO 1

F2 - Acquisition Parameters  
Date\_ 20220618  
Time 17.37  
INSTRUM spect  
PROBHD 5 mm PABBO BB/  
PULPROG zg30  
TD 32768  
SOLVENT CDCl3  
DS 6  
SS 2  
SMB 8223.685 Hz  
FIDRES 0.250967 Hz  
AQ 1.9922944 sec  
RG 120.16  
SW 60.800 usec  
DE 6.50 usec  
TE 297.2 K  
D1 1.0000000 sec  
TDO 1

----- CHANNEL f1 -----  
SF01 400.1524711 MHz  
NUC1 1H  
P1 14.75 usec  
PLW1 12.0000000 W

F2 - Processing parameters  
SI 16384  
SF 400.150087 MHz  
WDW SM  
SSB 0  
LB 0.30 Hz  
GB 0  
PC 1.00

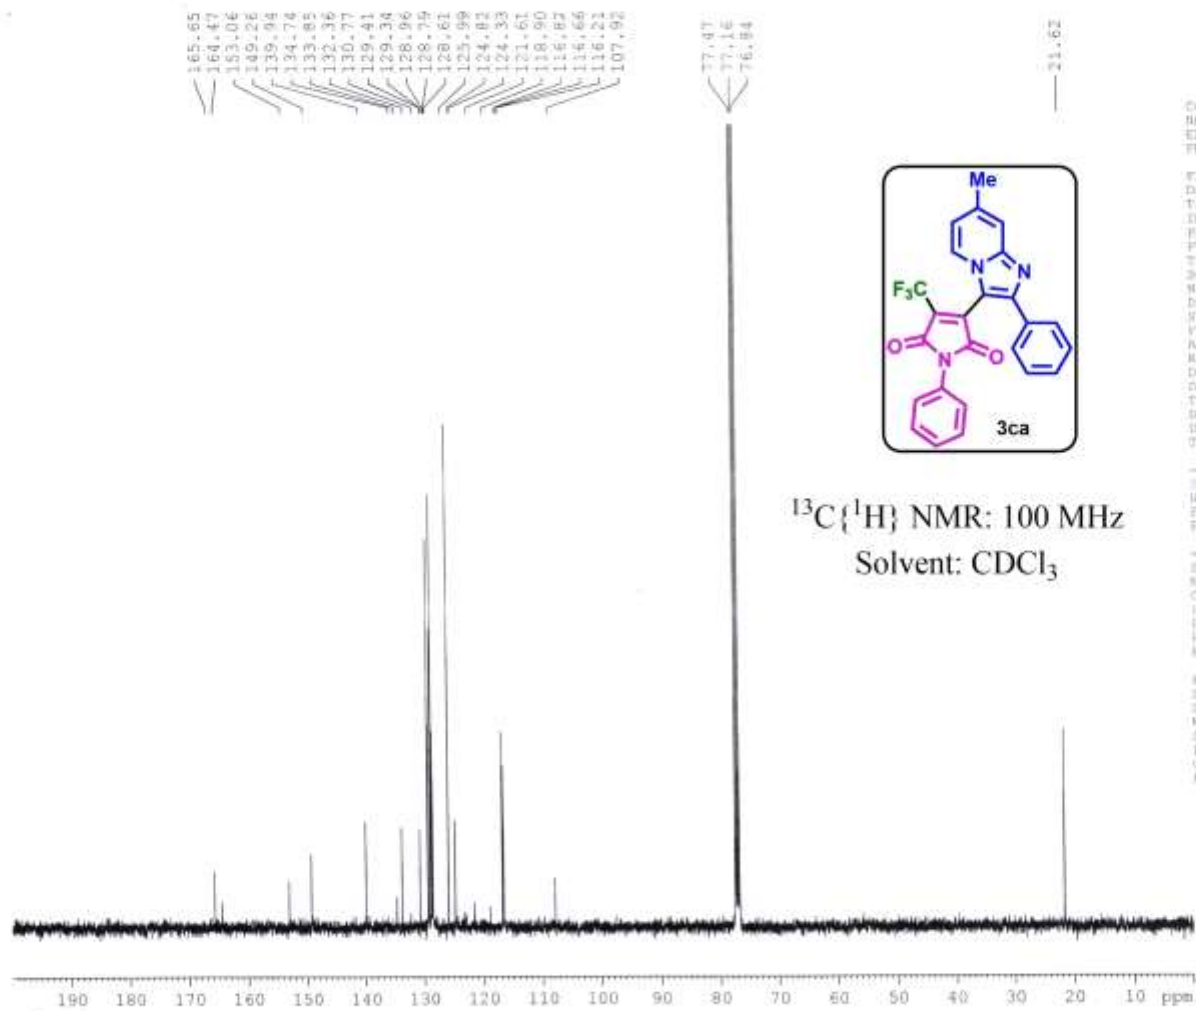

Current Data Parameters  
 NAME: Dr. S HANNA-2022-13C  
 EXPTNO: 208  
 PROCNO: 1

F2 - Acquisition Parameters  
 Date\_: 20220618  
 Time: 14.28  
 INSTRUM: spect  
 PROBRD: 5 mm BBOBO HNF  
 PULPROG: zgpg30  
 TD: 65536  
 SOLVENT: CDCl3  
 NS: 1024  
 DS: 2  
 SWH: 24038.461 Hz  
 FIDRES: 0.723596 Hz  
 AQ: 0.6815744 sec  
 RG: 145.12  
 DB: 00.000 dBsec  
 CB: 6.50 dBsec  
 TS: 297.4 K  
 SI: 2.00000000 sec  
 SFI: 0.20000000 sec  
 TDD: 1

----- CHANNEL f1 -----  
 SFO1: 100.6270000 MHz  
 NUQ1: 2.00  
 F1: 8.90 usec  
 PLM1: 54.00000000 W

----- CHANNEL f2 -----  
 SFO2: 400.1514000 MHz  
 NUQ2: 18  
 CUPRO13: waltz16  
 PCPD0: 80.00 usec  
 PLM2: 13.00000000 W  
 PLM3: 0.42231000 W  
 PLM4: 0.34231000 W

F2 - Processing parameters  
 SI: 14384  
 SF: 100.6177843 MHz  
 WSW: 0  
 LB: 1.00 Hz  
 GB: 0  
 PC: 1.40

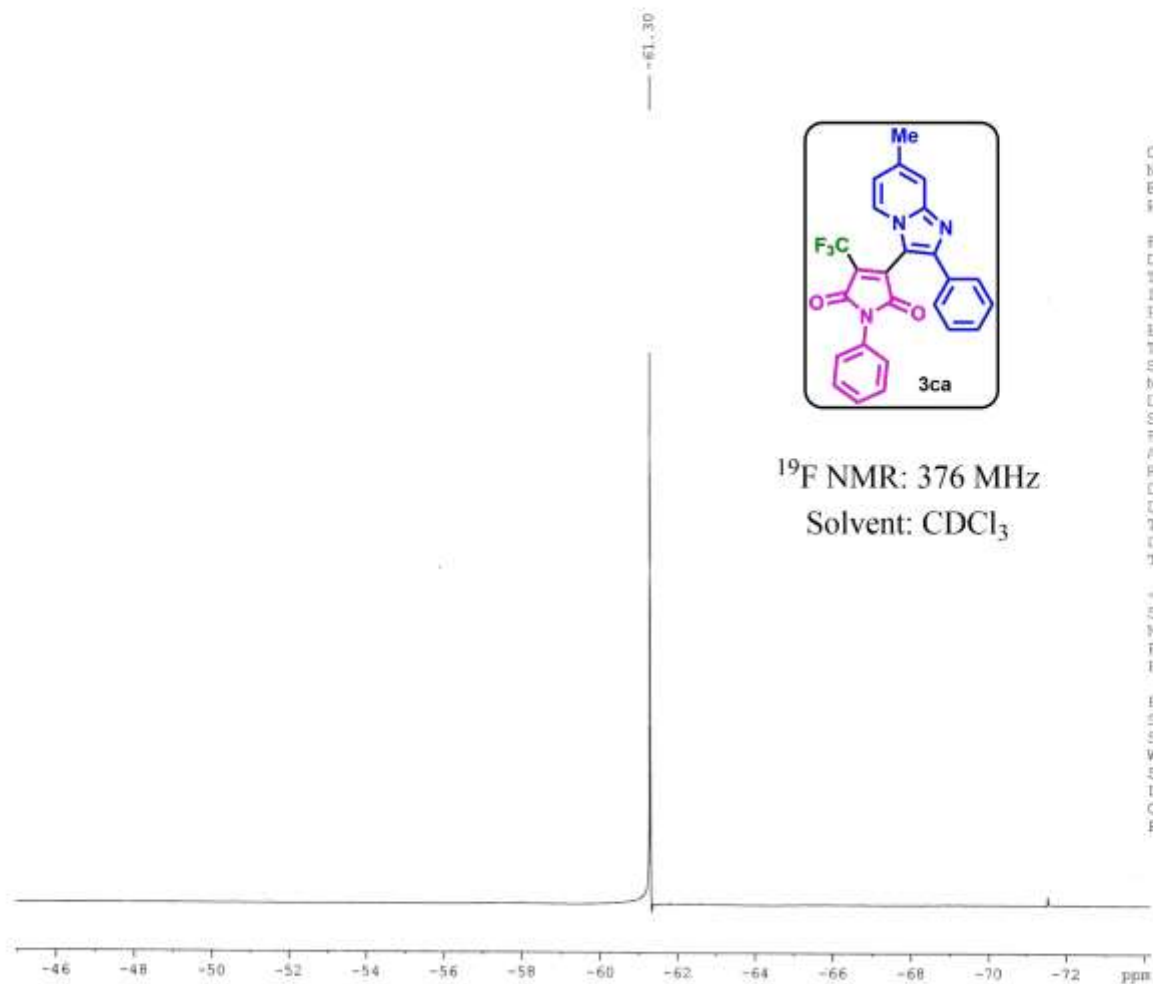

Current Data Parameters  
 NAME Dr. A HAJRA 2022 1H  
 EXPNO 572  
 PROCNO 1

F2 - Acquisition Parameters  
 Date\_ 20220617  
 Time 15.42  
 INSTRUM spect  
 PROBHD 5 mm PASBO BB/  
 PULPROG zgpg30  
 TD 32768  
 SOLVENT CDCl3  
 NS 8  
 DS 2  
 SWH 89285.711 Hz  
 FIDRES 2.724784 Hz  
 AQ 0.1835008 sec  
 RG 186.42  
 DW 5.600 usec  
 DE 6.50 usec  
 TE 297.2 K  
 D1 1.00000000 sec  
 TDO 1

----- CHANNEL f1 -----  
 SFO1 376.4795333 MHz  
 NUC1 19F  
 P1 12.50 usec  
 PLW1 20.00000000 W

F2 - Processing parameters  
 SI 16384  
 SF 376.5171850 MHz  
 WDW EM  
 SSB 0  
 LB 0.30 Hz  
 GB 0  
 PC 1.00

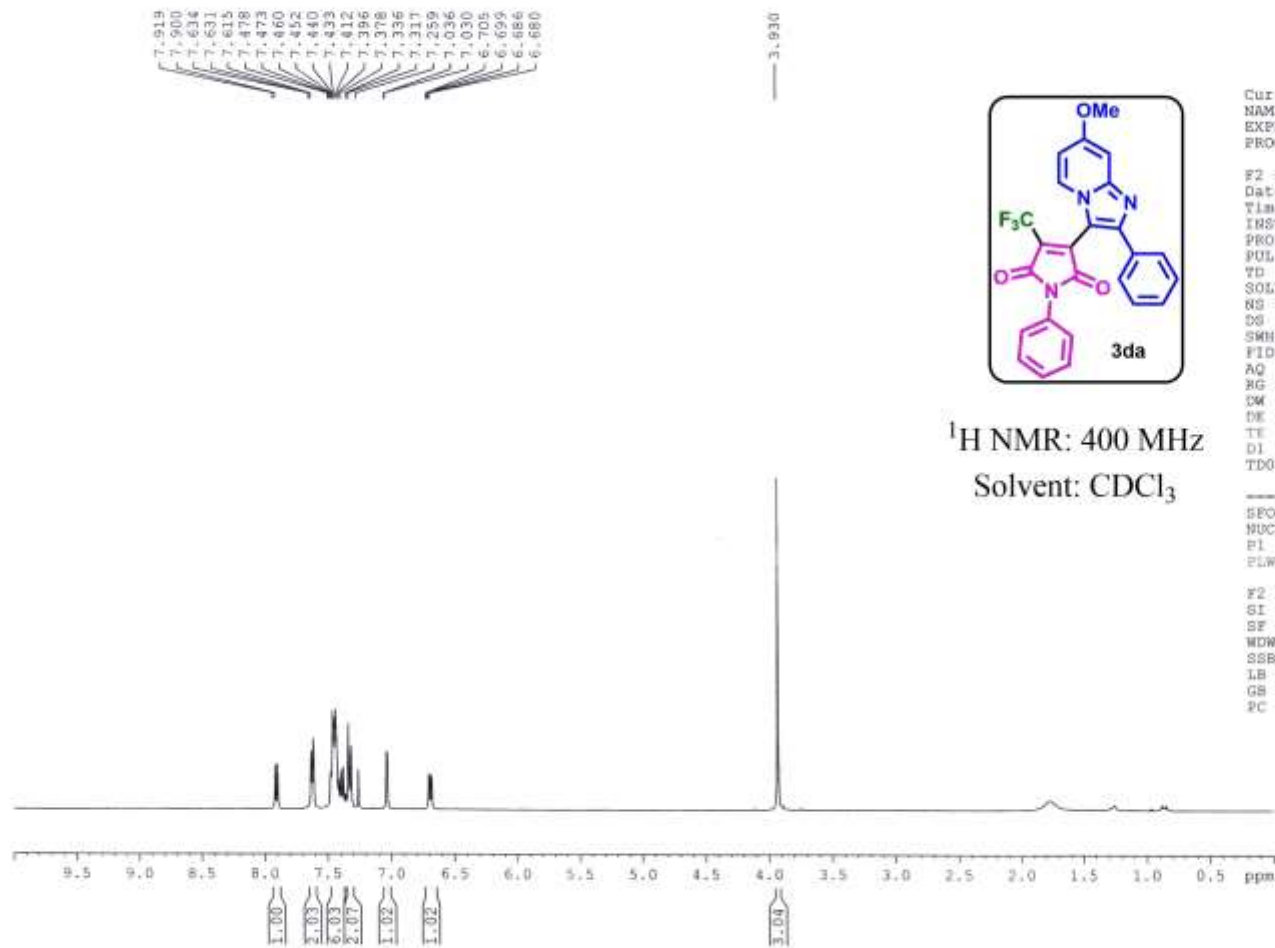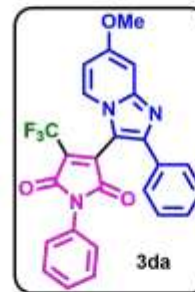

<sup>1</sup>H NMR: 400 MHz  
Solvent: CDCl<sub>3</sub>

Current Data Parameters  
NAME Dr. A HAJRA 2022 1H  
EXPNO 596  
PROCNO 1

F2 - Acquisition Parameters  
Date 20220620  
Time 10.59  
INSTRUM spect  
PROBHD 5 mm PABBO BB/  
PULPROG zg30  
TD 32768  
SOLVENT CDCl3  
NS 8  
DS 2  
SWH 8223.685 Hz  
FIDRES 0.250967 Hz  
AQ 1.9922944 sec  
RG 106.66  
CW 60.800 usec  
DE 4.50 usec  
TE 300.1 K  
D1 1.00000000 sec  
TDO -1

----- CHANNEL f1 -----  
SFO1 400.1524711 MHz  
NUC1 1H  
P1 14.75 usec  
PLW1 12.00000000 W

F2 - Processing parameters  
SI 16384  
SF 400.1500087 MHz  
WDW EM  
SSB 0  
LB 0.30 Hz  
GB 0  
PC 1.00

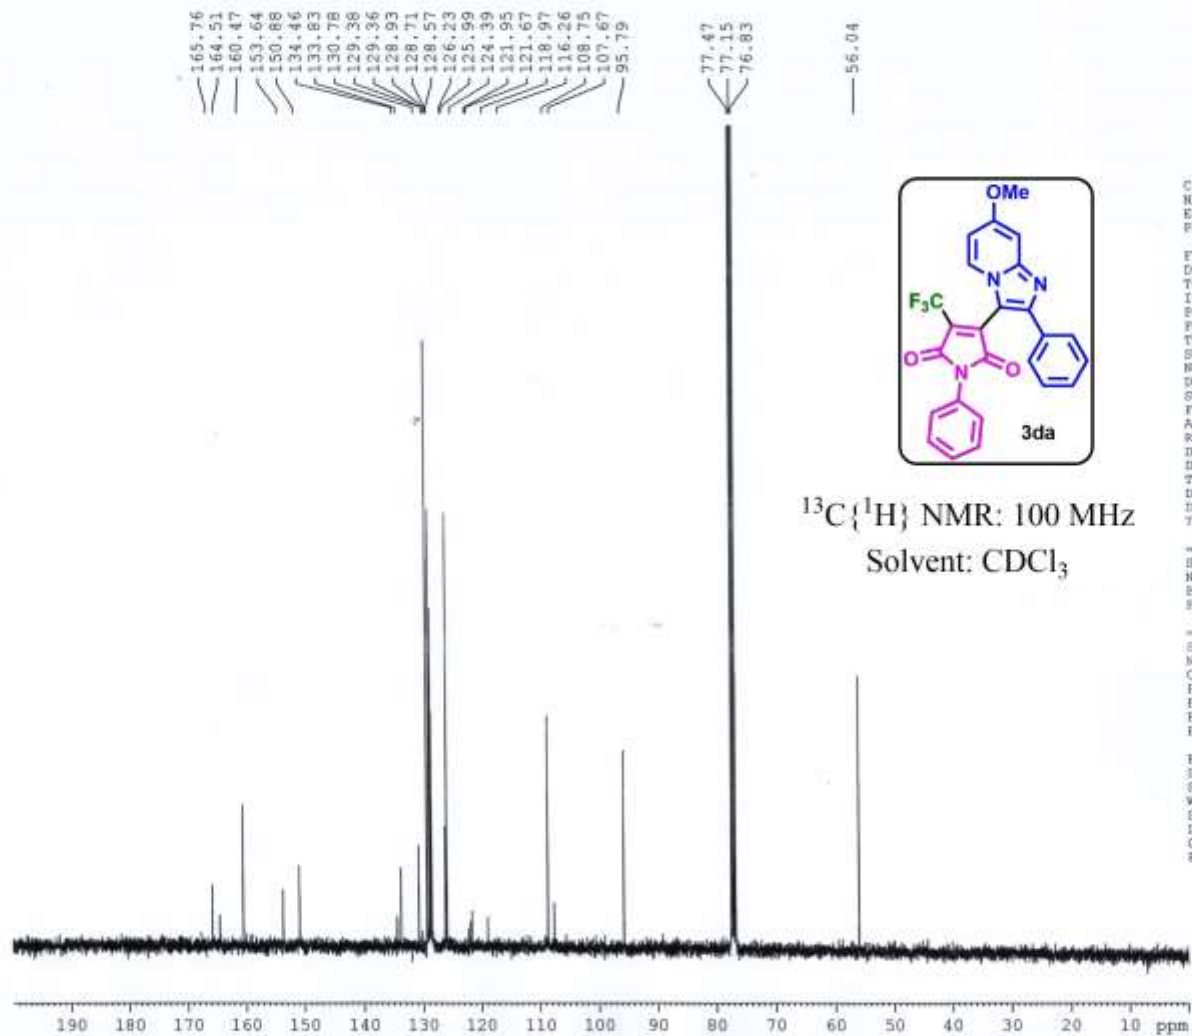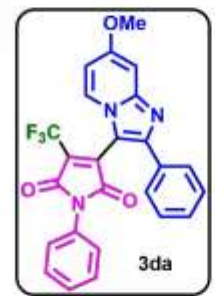

Current Data Parameters  
 NAME: Dr. A HAJRA-2022-13C  
 EXPNO: 233  
 PROCNO: 1

F2 - Acquisition Parameters  
 Date\_: 20220620  
 Time: 11.39  
 INSTRUM: spect  
 PROBHD: 5 mm EBBB0 BB/  
 PULPROG: zgpg30  
 TD: 32768  
 SOLVENT: CDCl3  
 NS: 720  
 DS: 2  
 SWH: 24038.461 Hz  
 FIDRES: 0.733596 Hz  
 AQ: 0.6812744 sec  
 RG: 106.42  
 DW: 20.800 usec  
 DE: 6.50 usec  
 TE: 296.8 K  
 D1: 2.00000000 sec  
 D11: 0.03000000 sec  
 TDR: 1

----- CHANNEL f1 -----  
 NUC1: 100.6278588 MHz  
 P1: 1.3C  
 PL1: 8.90 usec  
 PL11: 54.00000000 W

----- CHANNEL f2 -----  
 NUC2: 400.1316006 MHz  
 P2: 1H  
 PL2: 90.00 usec  
 PL12: 12.00000000 W  
 PL13: 0.32231000 W  
 PL14: 0.16212000 W

F2 - Processing parameters  
 SI: 16384  
 SF: 100.6177058 MHz  
 WDW: EM  
 SSB: 0  
 LB: 1.00 Hz  
 GB: 0  
 PC: 1.40

-63.09

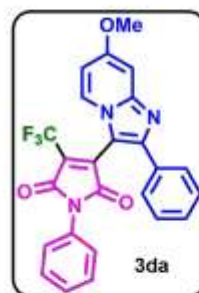

$^{19}\text{F}$  NMR: 376 MHz  
Solvent:  $\text{CDCl}_3$

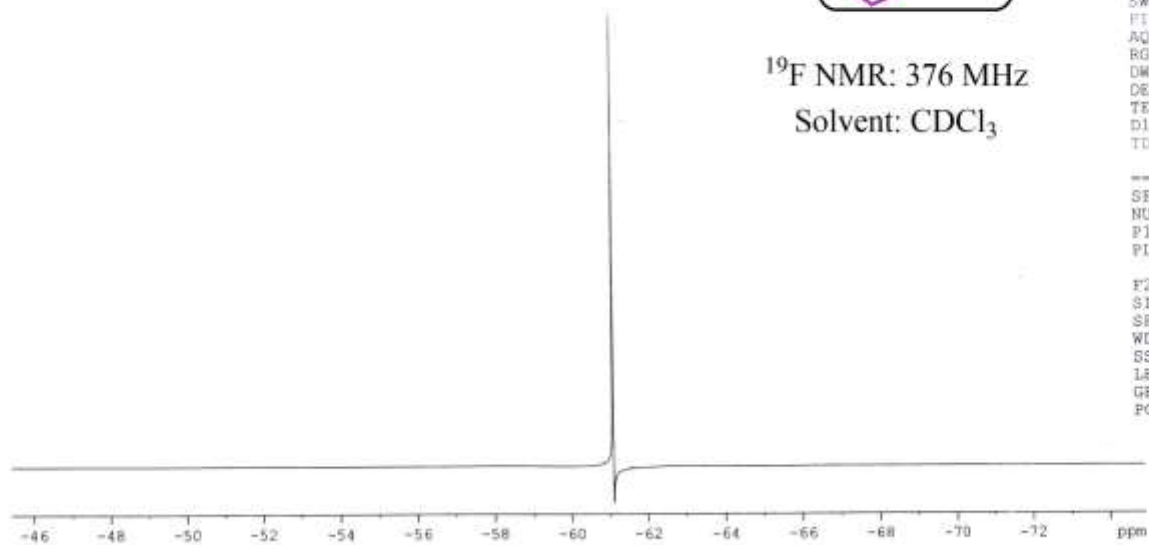

Current Data Parameters  
NAME Dr. A HAJRA 2022 1H  
EXPNO 597  
PROCNO 1

F2 - Acquisition Parameters  
Date\_ 20220620  
Time 11.04  
INSTRUM spect  
PROBHD 5 mm PABBO BB/  
PULPROG zgpg30  
TD 32768  
SOLVENT  $\text{CDCl}_3$   
NS 8  
DS 2  
SWH 89285.711 Hz  
FIDRES 2.724784 Hz  
AQ 0.1835008 sec  
RG 186.42  
DW 5.600 usec  
DE 6.50 usec  
TE 296.2 K  
D1 1.00000000 sec  
TDO 1

----- CHANNEL f1 -----  
SF01 376.4795333 MHz  
NUC1 19F  
P1 12.50 usec  
PLW1 20.00000000 W

F2 - Processing parameters  
SI 16384  
SF 376.5171850 MHz  
WDW EM  
SSB 0  
LB 0.30 Hz  
GB 0  
PC 1.00

8.101  
7.718  
7.694  
7.635  
7.631  
7.616  
7.613  
7.492  
7.475  
7.462  
7.445  
7.443  
7.428  
7.410  
7.395  
7.391  
7.370  
7.363  
7.359  
7.341  
7.260

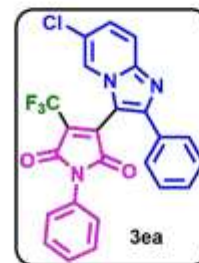

<sup>1</sup>H NMR: 400 MHz  
Solvent: CDCl<sub>3</sub>

Current Data Parameters  
NAME Dr. A HAJRA 2022 1H  
EXPNO 627  
PROCNO 1

F2 - Acquisition Parameters  
Date\_ 20220627  
Time 20.14  
INSTRUM spect  
PROBHD 5 mm PABBO B6/  
PULPROG zg30  
TD 32768  
SOLVENT CDCl3  
NS 8  
DS 2  
SWH 8223.685 Hz  
FIDRES 0.250967 Hz  
AQ 1.9922944 sec  
RG 87.66  
DW 60.800 usec  
DE 6.50 usec  
TE 298.1 K  
D1 1.00000000 sec  
TD0 1

----- CHANNEL f1 -----  
SFO1 400.1524711 MHz  
NUC1 1H  
P1 14.75 usec  
PLW1 12.00000000 W

F2 - Processing parameters  
SI 16384  
SF 400.1500084 MHz  
WDW EM  
SSB 0  
LB 0.30 Hz  
GB 0  
PC 1.00

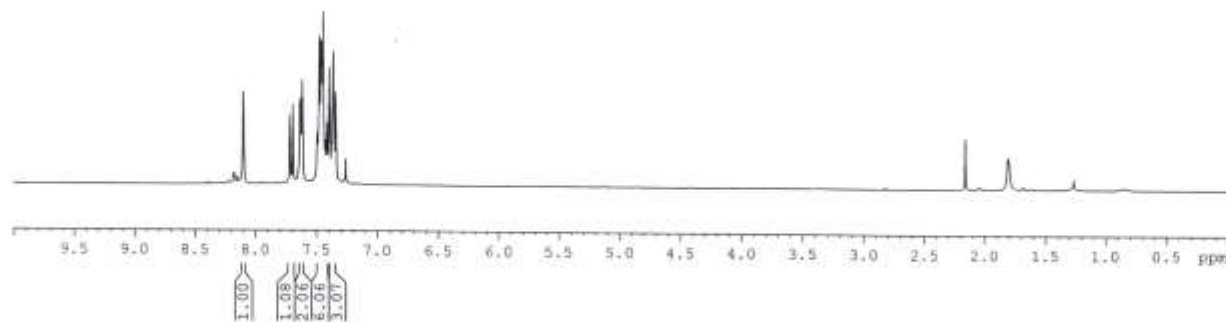



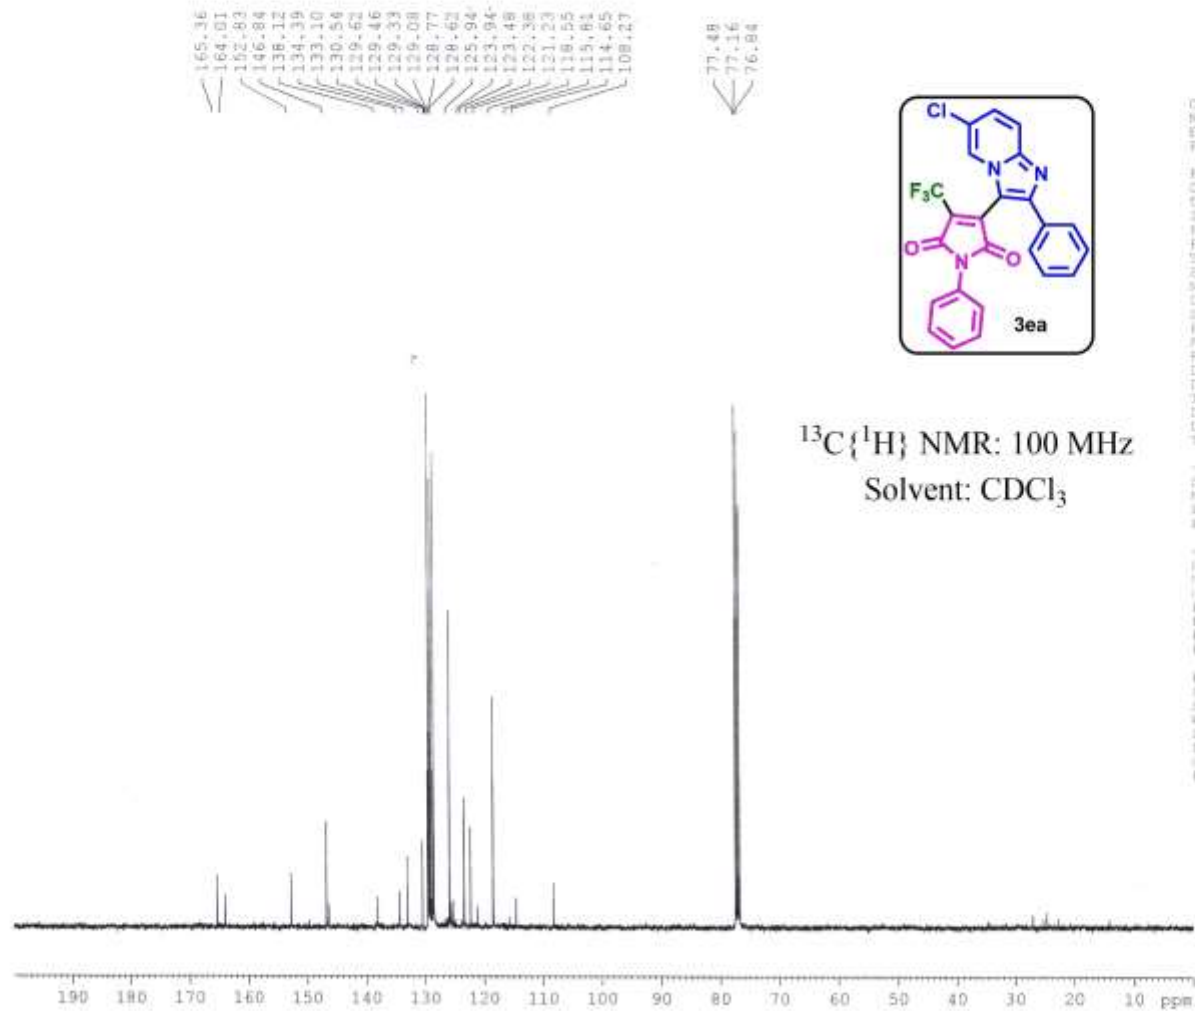

Current Data Parameters  
NAME Dr. A 04/04-1002-13C  
EXPNO 245  
PROCNO 7

F2 - Acquisition Parameters  
Date\_ 20220427  
Time 18.31  
INSTRUM spect  
PROBHD 5 mm TARG BBI  
PULPROG zgpg30  
TD 32768  
SOLVENT CDCl3  
NS 1024  
DS 2  
SWH 24028.161 Hz  
FIDRES 0.733594 Hz  
AQ 0.6915744 sec  
RG 186.42  
DW 20.900 usec  
DE 8.50 usec  
TE 297.4 K  
D1 2.80000000 sec  
C11 0.03200000 sec  
T1R 2

----- CHANNEL f1 -----  
NUC1 101.6278588 MHz  
NUC2 13C  
P1 8.90 usec  
PLW1 54.00000000 W

----- CHANNEL f2 -----  
SFO2 400.1516004 MHz  
NUC2 1H  
CPCORRG2 Waitin  
PCOR2 90.00 usec  
PLW2 15.00000000 W  
PLW12 0.32231050 W  
PLW13 0.16212000 W

F2 - Processing parameters  
SI 16294  
SF 100.6177870 MHz  
WDW EM  
SSB 0  
LB 1.00 Hz  
GB 0  
PC 1.40

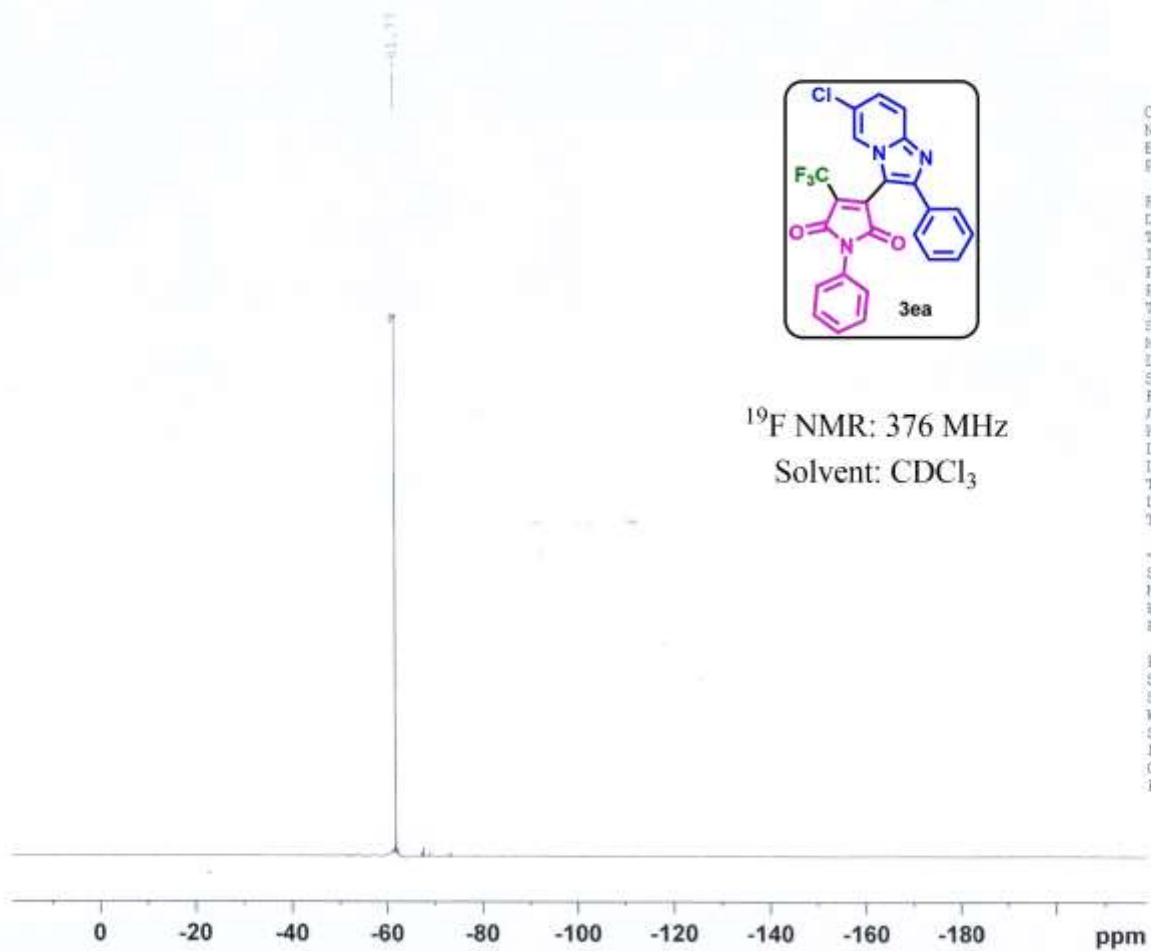

Current Data Parameters  
 NAME Dr. A HAJRA 2022 1H  
 EXPNO 625  
 PROCNO 1

F2 - Acquisition Parameters  
 Date\_ 20220627  
 Time\_ 17.42  
 INSTRUM spect  
 PROBHD 5 mm PABBO BB/  
 PULPROG zgpg30  
 TD 32768  
 SOLVENT CDCl3  
 NS 8  
 DS 2  
 SWH 89285.711 Hz  
 FIDRES 2.724794 Hz  
 AQ 0.1835008 sec  
 RG 87.66  
 DW 5.600 usec  
 DE 6.50 usec  
 TE 296.6 K  
 D1 1.00000000 sec  
 TDO 1

----- CHANNEL f1 -----  
 SFO1 376.4795333 MHz  
 NUCl 19F  
 P1 12.50 usec  
 PLW1 20.00000000 W

F2 - Processing parameters  
 SI 16384  
 SF 376.5171850 MHz  
 WDM EM  
 SSB 0  
 LB 0.30 Hz  
 GB 0  
 PC 1.00

8.197  
7.873  
7.649  
7.635  
7.630  
7.615  
7.493  
7.490  
7.479  
7.462  
7.445  
7.400  
7.381  
7.363  
7.343  
7.359

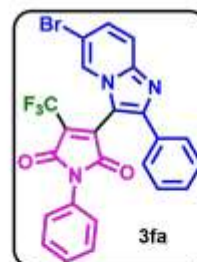

<sup>1</sup>H NMR: 400 MHz  
Solvent: CDCl<sub>3</sub>

Current Data Parameters  
NAME Dr. A HAJRA 2022 1H  
EXPNO 636  
PROCNO 1

F2 - Acquisition Parameters  
Date\_ 20220701  
Time 20.13  
INSTRUM spect  
PROBHD 5 mm PABBO BB/  
PULPROG zg30  
TD 32768  
SOLVENT CDCl3  
NS 8  
DS 2  
SWH 8223.685 Hz  
FIDRES 0.230967 Hz  
AQ 1.9922944 sec  
RG 106.66  
DM 60.800 usec  
DE 6.50 usec  
TE 297.8 K  
D1 1.00000000 sec  
TDO 1

----- CHANNEL f1 -----  
SFO1 400.1524711 MHz  
NDC1 1H  
P1 14.75 usec  
PLW1 12.00000000 W

F2 - Processing parameters  
SI 16384  
SF 400.1500084 MHz  
WDW EM  
SSB 0  
LB 0.30 Hz  
GB 0  
PC 1.00

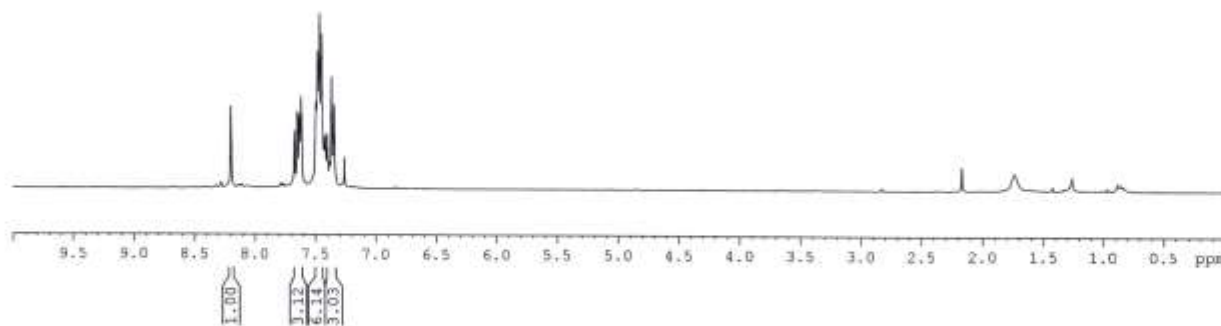

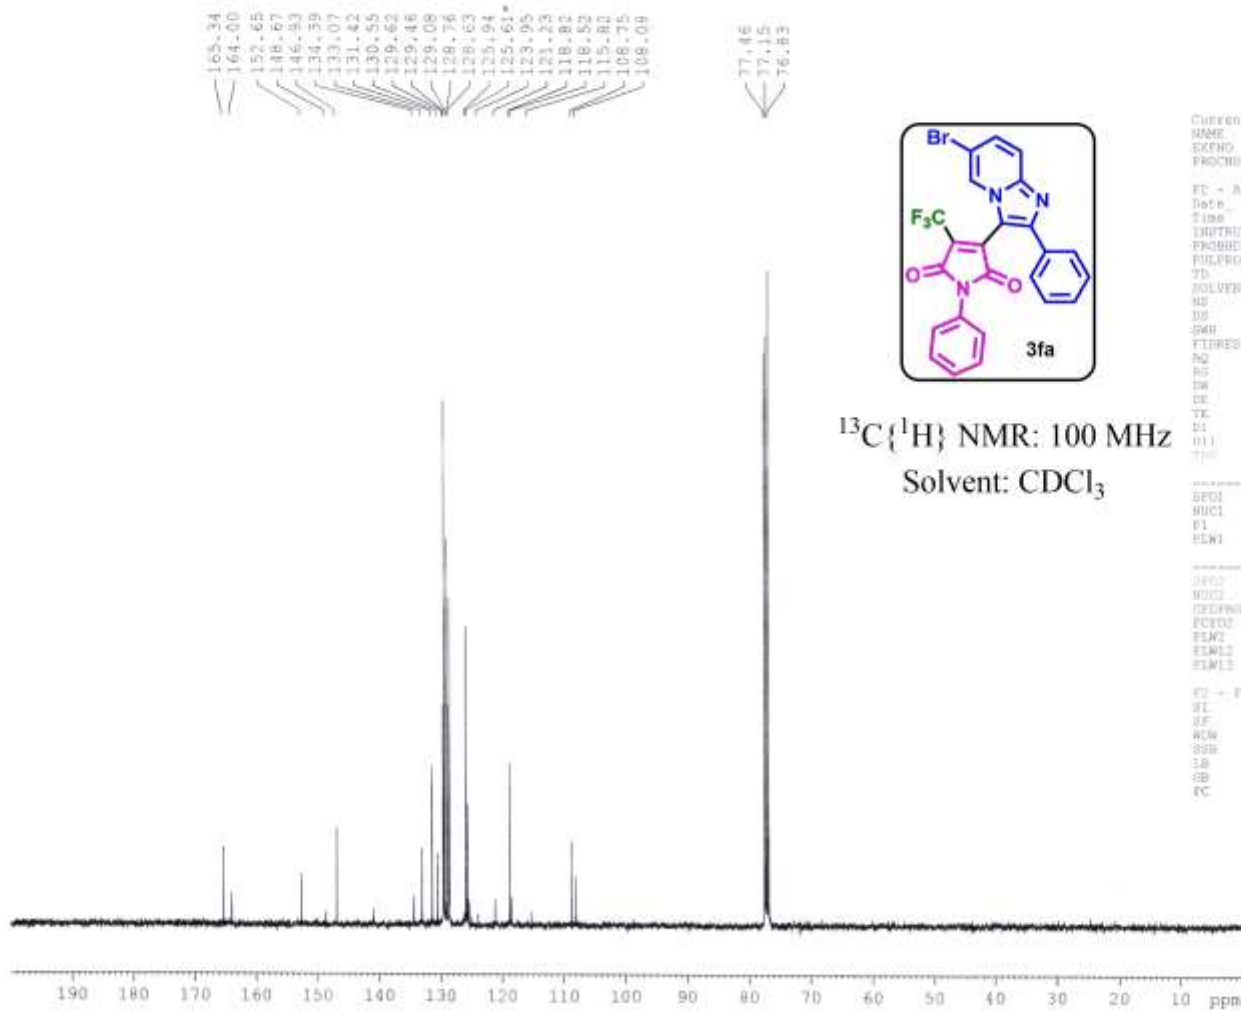

Current Data Parameters  
NAME: Dr. A. WJMA-2022-100  
EXPNO: 259  
PROCNO: 1

FT - Acquisition Parameters  
Date\_ : 20220701  
Time : 21.01  
INSTRUM : spect  
PROBHD : 5 mm cpdco mm/  
PULPROG : zgpg20  
TD : 32768  
SOLVENT : CDCl3  
NS : 1024  
DS : 2  
SWH : 24038.842 Hz  
FIDRES : 0.733096 Hz  
AQ : 0.6815744 sec  
RG : 104.66  
DW : 20.800 usec  
DE : 6.00 usec  
TE : 298.0 K  
D1 : 2.00000000 sec  
D11 : 0.20000000 sec  
D12 : 0.20000000 sec

----- CHANNEL f1 -----  
NUC1 : 13C  
P1 : 9.00 usec  
PL1 : 0.00000000 W

----- CHANNEL f2 -----  
NUC2 : 1H  
P2 : 18.00 usec  
PL2 : 0.00000000 W  
PL12 : 0.22000000 W  
PL13 : 0.18000000 W

FT - Processing parameters  
SI : 16384  
SF : 100.627813 MHz  
WDW : EM  
SSB : 0  
LB : 1.00 Hz  
GB : 0  
PC : 1.40

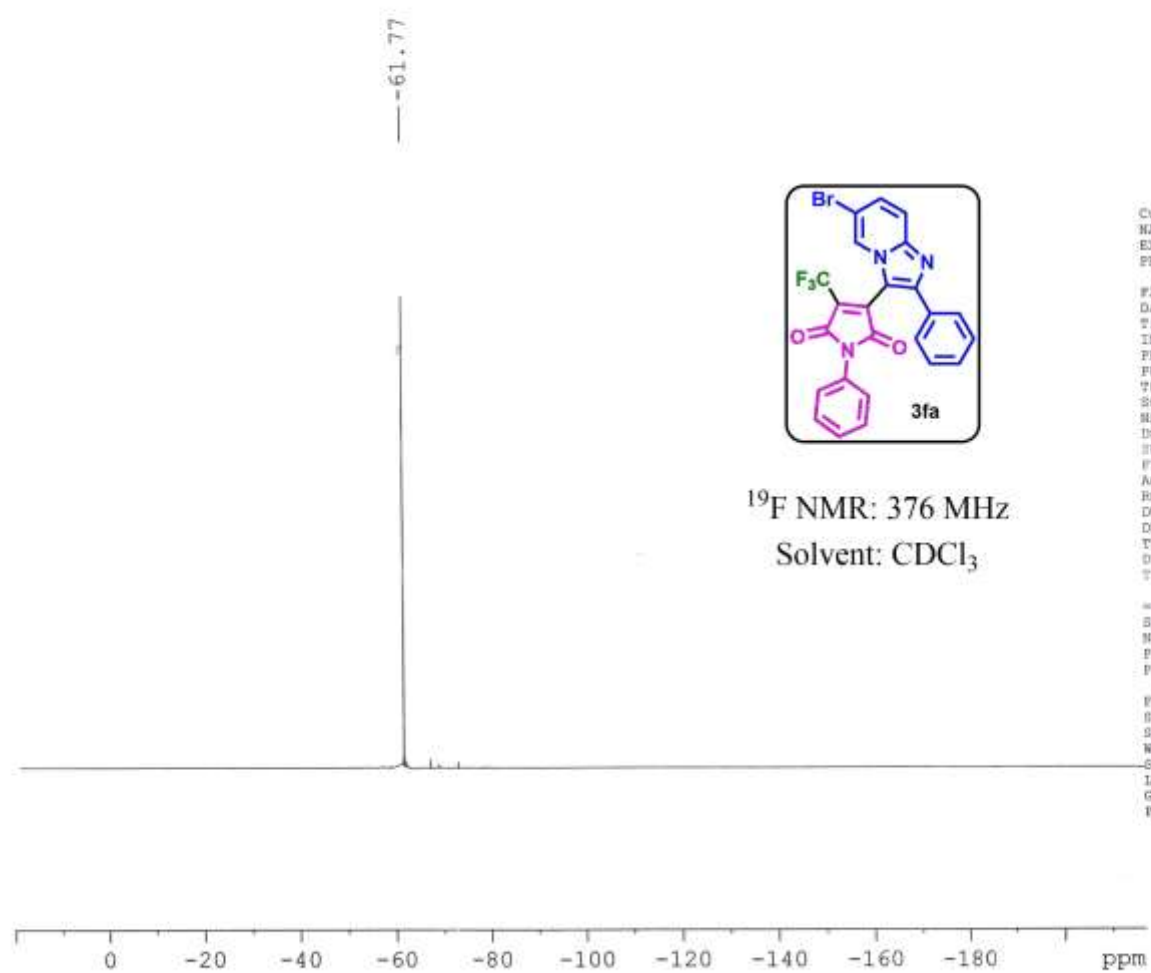

```

Current Data Parameters
NAME      Dr. A HAJRA 2022 1H
EXPNO     637
PROCNO    1

F2 - Acquisition Parameters
Date_     20220701
Time      20.13
INSTRUM   spect
PROBHD    5 mm PABBO BB/
PULPROG   zgpg30
TD        32768
SOLVENT   CDCl3
NS        8
DS        2
SWH        89385.711 Hz
FIDRES    2.724784 Hz
AQ         0.1835008 sec
RG         106.66
DM         5.600 usec
DE         6.50 usec
TE         297.2 K
D1         1.00000000 sec
TD0        1

***** CHANNEL f1 *****
SFO1      376.4795333 MHz
NUC1       19F
P1         12.50 usec
PL1        20.00000000 W

F2 - Processing parameters
SI         16384
SF         376.5171850 MHz
WDW        EM
SSB        0
LB         0.30 Hz
GB         0
PC         1.00

```

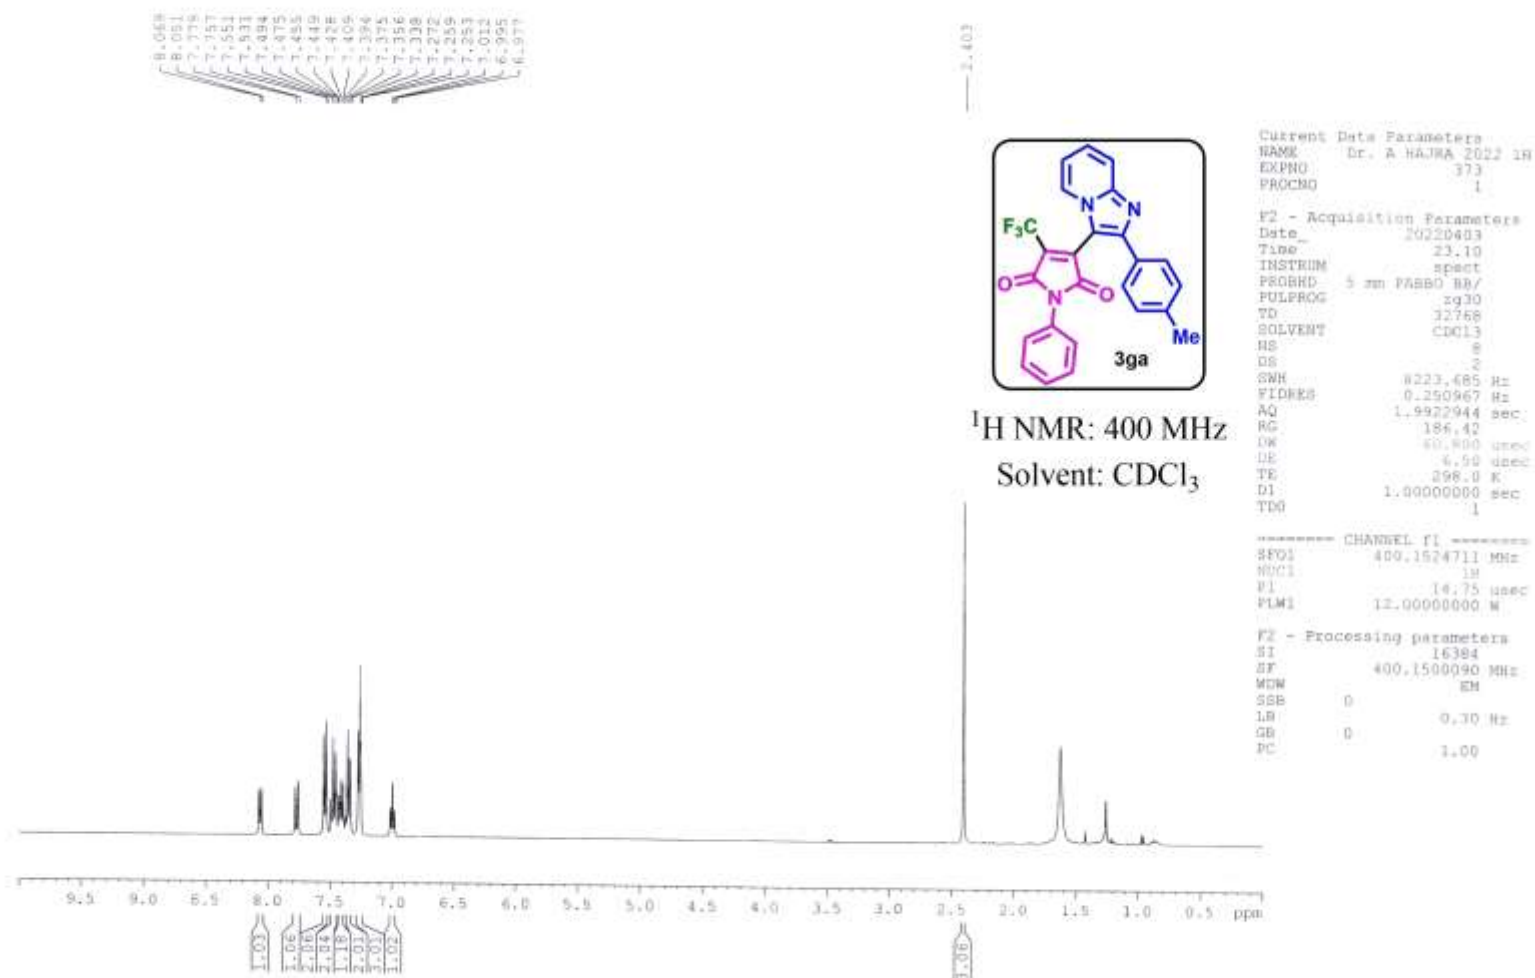

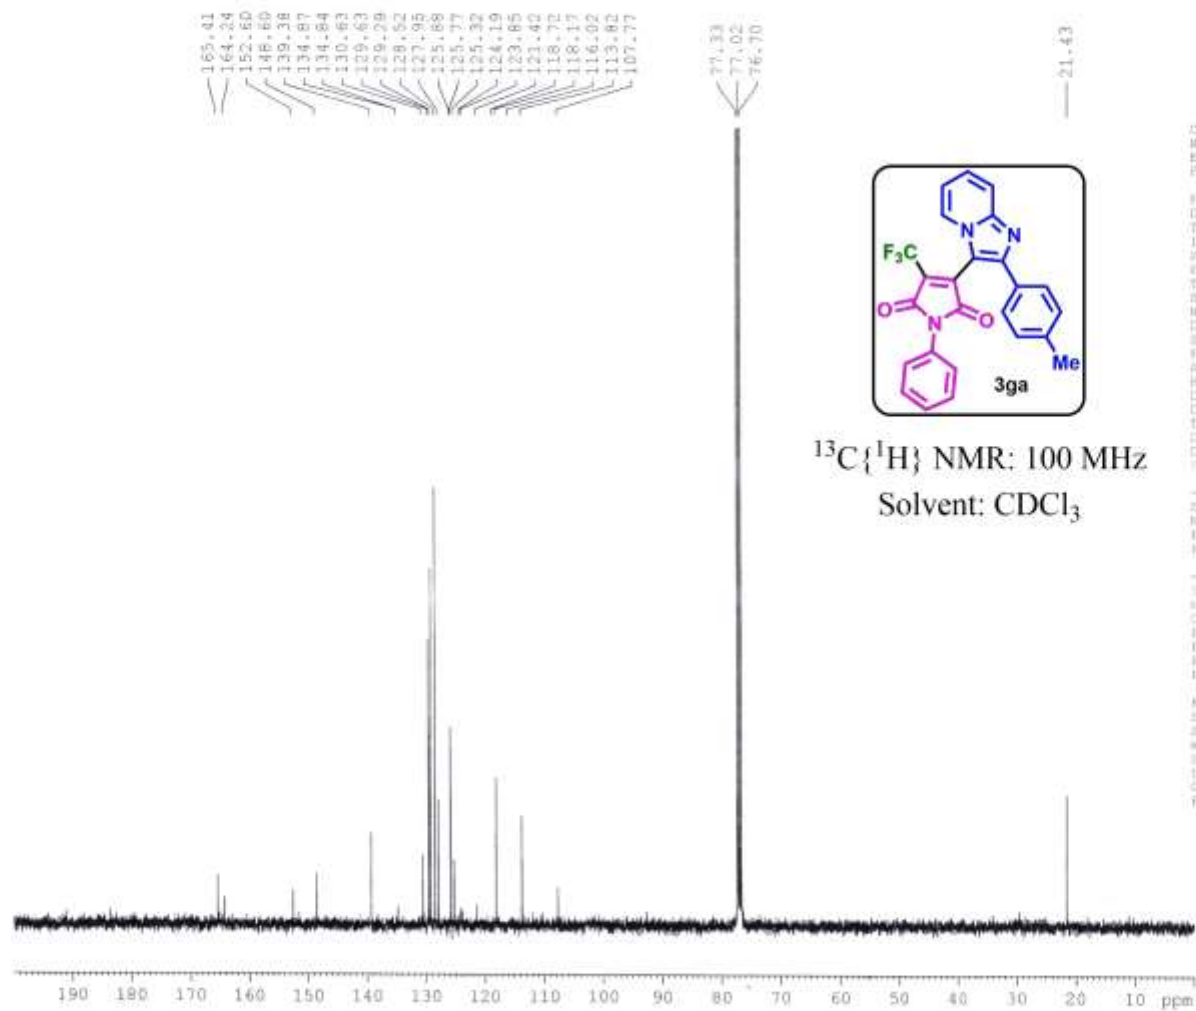

Current Data Parameters  
 NAME: Dr. A NUTRA-2022-13C  
 EXPNO: 151  
 PROCNO: 1

F2 - Acquisition Parameters  
 Date\_: 20220408  
 Time: 10.38  
 INSTRUM: spect  
 PROCPRO: 3 mm DBBO BB7  
 PULPROG: zgpg30  
 TD: 32768  
 SOLVENT: CDCl3  
 NS: 1224  
 DS: 2  
 SWH: 24039.461 Hz  
 FIDRES: 0.722594 Hz  
 AQ: 0.4815744 sec  
 RG: 186.42  
 CW: 20.600 usec  
 DE: 8.00 usec  
 TE: 300.2 K  
 DI: 2.00000000 sec  
 DLI: 0.03000000 sec  
 CDE:

CHANNEL F1  
 NUC1: 100.6278500 MHz  
 P1: 13C  
 PL1: 8.90 usec  
 PR1: 54.0000000 W

CHANNEL F2  
 NUC2: 400.1514000 MHz  
 P2: 1H  
 PL2: 90.00 usec  
 PR2: 13.0000000 W  
 PL12: 0.32231000 W  
 PR12: 0.14212000 W

F2 - Processing parameters  
 SI: 16384  
 SF: 100.6177900 MHz  
 KW: EN  
 LB: 0  
 GB: 0  
 PC: 1.40

01.02

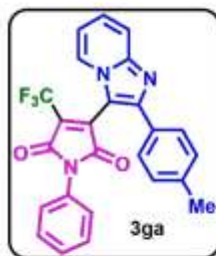

$^{19}\text{F}$  NMR: 376 MHz  
Solvent:  $\text{CDCl}_3$

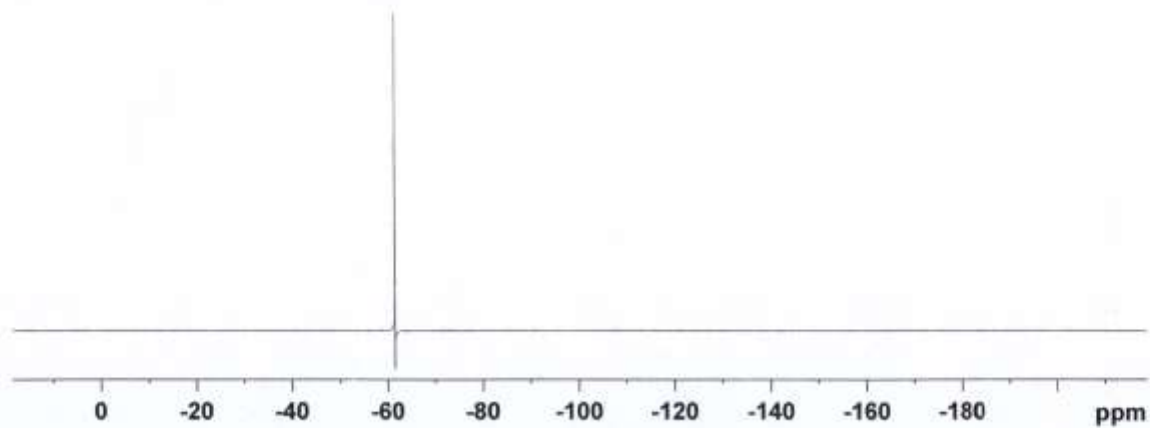

Current Data Parameters  
NAME Dr. A HAJRA 2022 1H  
EXPNO 342  
PROCNO 1

F2 - Acquisition Parameters  
Date\_ 20220330  
Time\_ 21.32  
INSTRUM spect  
PROBHD 5 mm PABBO BB/  
PULPROG zgpg30  
TD 32768  
SOLVENT CDCl3  
NS 8  
DS 2  
SWH 89285.711 Hz  
FIDRES 2.724784 Hz  
AQ 0.1835008 sec  
RG 148.91  
CW 5.600 usec  
DE 6.50 usec  
TE 298.6 K  
D1 1.00000000 sec  
TD0 1

----- CHANNEL f1 -----  
SFO1 376.4795333 MHz  
NUC1 19F  
P1 12.50 usec  
PLW1 20.00000000 W

F2 - Processing parameters  
SI 16384  
SF 376.5171850 MHz  
WDW EM  
SSB 0  
LB 0.30 Hz  
GB 0  
PC 1.00



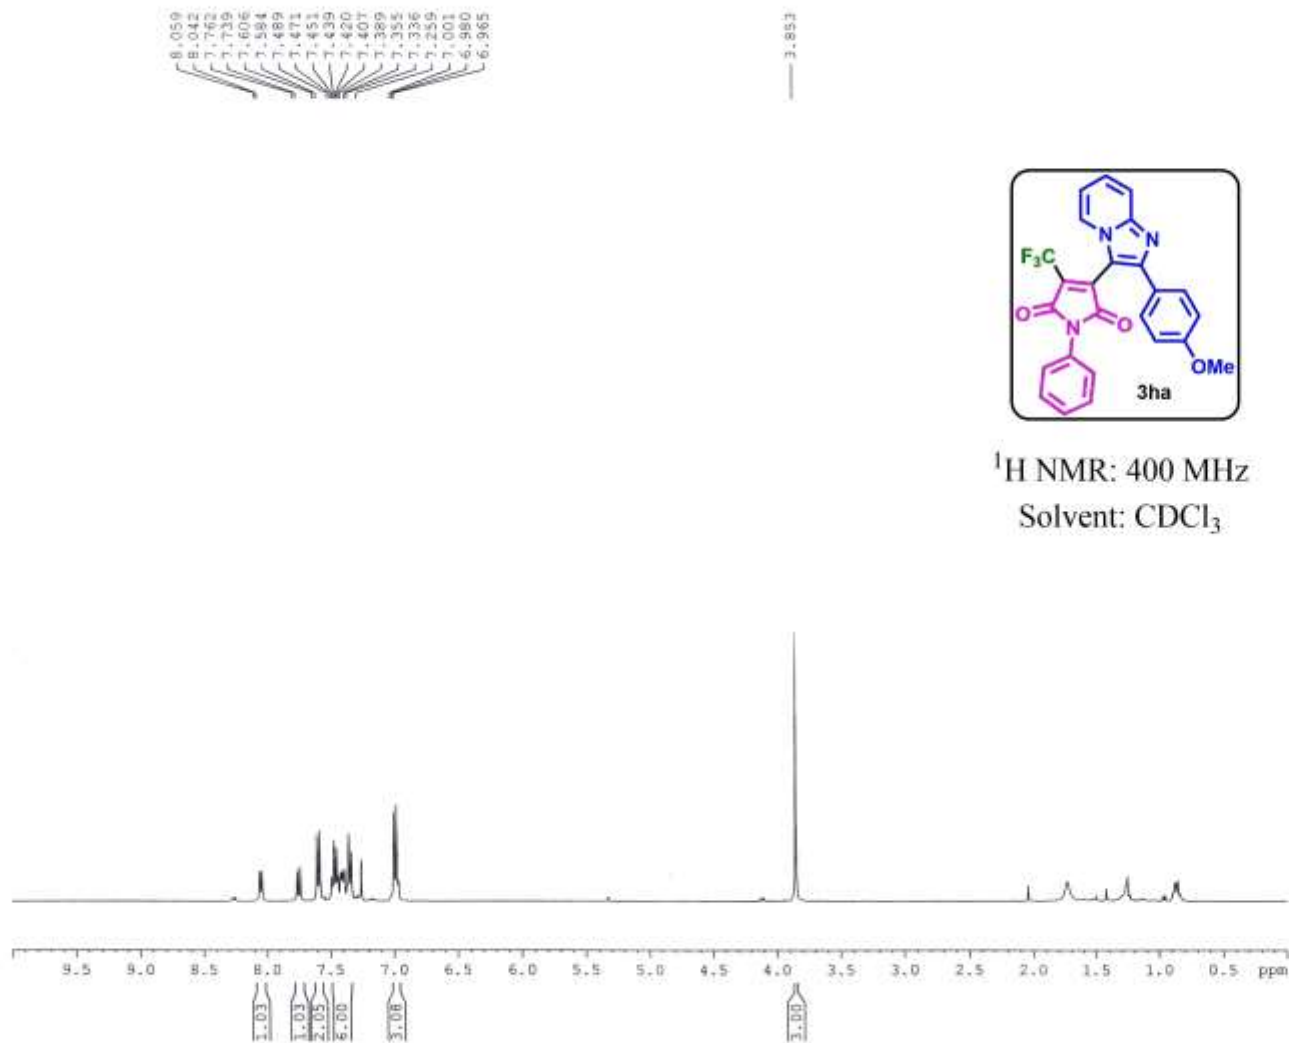

Current Data Parameters  
NAME Dr. A HAJRA 2022 IH  
EXPNO 763  
PROCNO 1

F2 - Acquisition Parameters  
Date\_ 20220825  
Time 16.17  
INSTRUM spect  
PROBHD 5 mm PABBO BB/  
PULPROG zg30  
TD 32768  
SOLVENT CDCl3  
NS 8  
DS 2  
SWH 8223.685 Hz  
FIDRES 0.250967 Hz  
AQ 1.9922944 sec  
RG 93.46  
DW 60.800 usec  
DE 6.50 usec  
TE 295.8 K  
D1 1.00000000 sec  
TD0 1

----- CHANNEL f1 -----  
SFO1 400.1524711 MHz  
NUC1 1H  
P1 14.75 usec  
PLW1 12.00000000 W

F2 - Processing parameters  
SI 16384  
SF 400.1500087 MHz  
WDW EM  
SSB 0  
LB 0.30 Hz  
GB 0  
PC 1.00

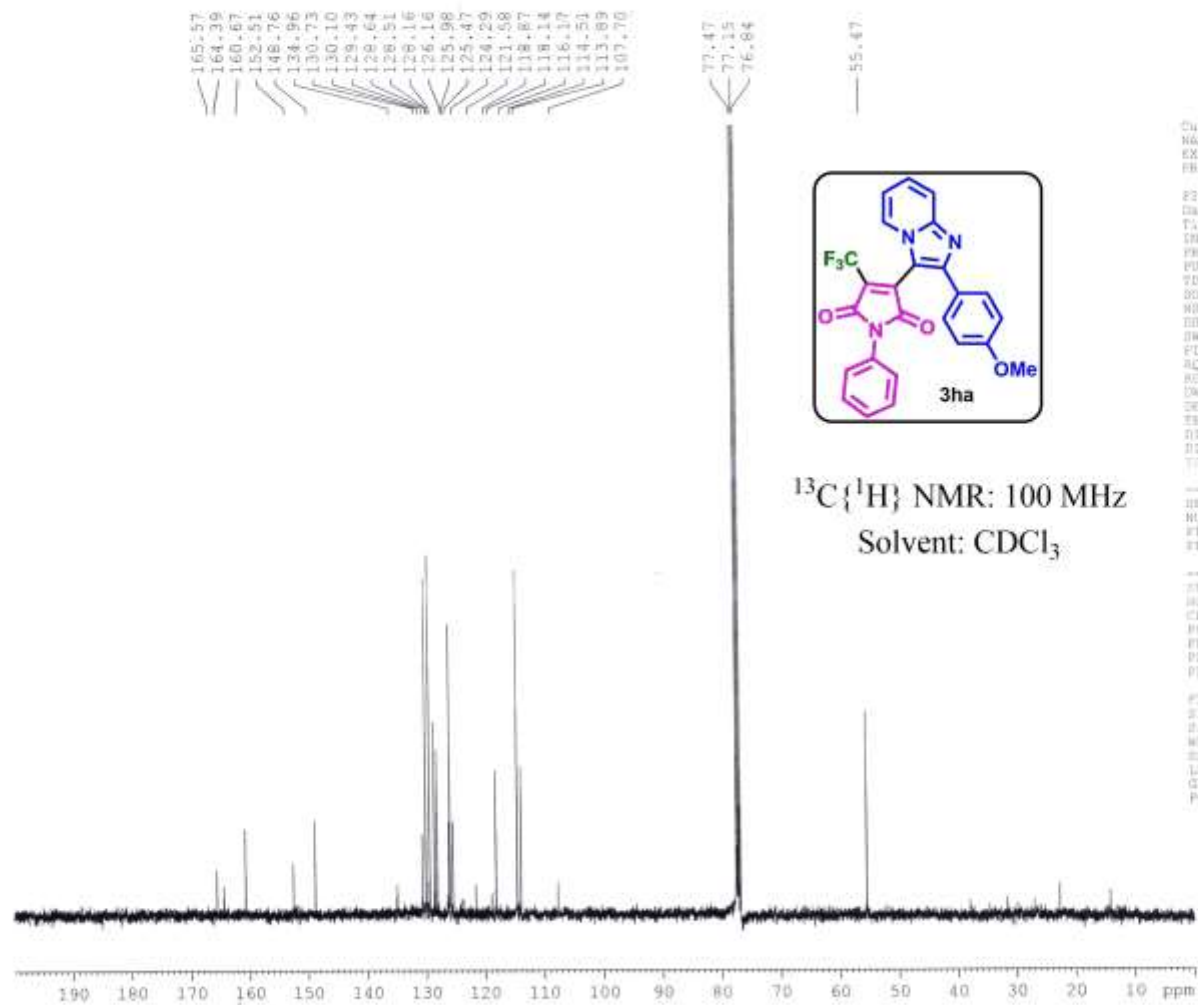

Current Data Parameters  
 NAME Dr. A. RAJPA-2022-130  
 EXPNO 316  
 PROCNO 1

F2 - Acquisition Parameters  
 Date\_ 20220623  
 Time 14.53  
 INSTRUM spect  
 PROBRD 5 mm-PBBO BB7  
 PULPROG zgpg30  
 VD 32748  
 SOLVENT CDCl3  
 NS 640  
 DS 2  
 SWH 24029.461 Hz  
 FIDRES 0.733096 Hz  
 AQ 0.4810144 sec  
 RG 83.46  
 CW 10.600 usec  
 CC 4.50 usec  
 CR 394.13  
 DI 3.0000000 sec  
 DLI 0.0300000 sec  
 TD 1

----- CHANNEL f1 -----  
 NUC1 100.6274058 MHz  
 NUCL1 13C  
 P1 8.90 usec  
 PL1 34.0000000 W

----- CHANNEL f2 -----  
 NUC2 400.1140000 MHz  
 NUCL2 1H  
 CPDPRG2 waltz16  
 PCPD2 80.00 usec  
 PLW2 12.0000000 W  
 PLW12 0.33731000 W  
 PLW13 0.16210000 W

F2 - Processing parameters  
 SI 16384  
 SF 100.6177810 MHz  
 NSW 328  
 DSF 0  
 SSB 1.00 Hz  
 GB 0  
 PC 1.00

—61.38

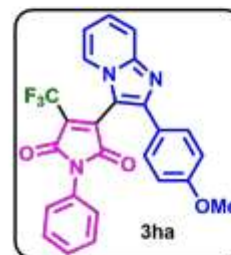

$^{19}\text{F}$  NMR: 376 MHz  
Solvent:  $\text{CDCl}_3$

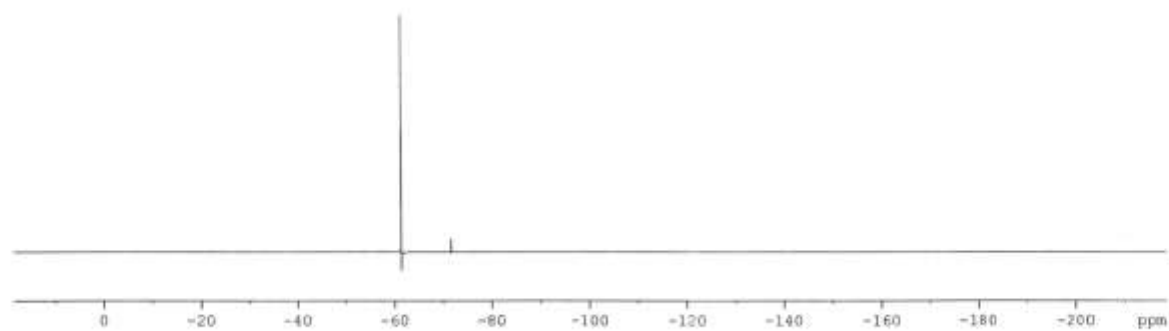

Current Data Parameters  
NAME Dr. A HAJRA 2022 1H  
EXPNO 764  
PROCNO 1

F2 - Acquisition Parameters  
Date\_ 20220825  
Time\_ 16.21  
INSTRUM spect  
PROBHD 5 mm PABBO BB/  
PULPROG zgpg30  
TD 32768  
SOLVENT CDCl3  
NS 8  
DS 2  
SWH 69265.711 Hz  
FIDRES 2.724784 Hz  
AQ 0.1835008 sec  
RG 93.46  
RW 5.600 usec  
DE 6.50 usec  
TE 295.8 K  
D1 1.00000000 sec  
TDO 1

----- CHANNEL f1 -----  
SFO1 376.4795333 MHz  
NUC1 19F  
P1 12.50 usec  
PLW1 20.00000000 W

F2 - Processing parameters  
SI 16384  
SF 376.5171850 MHz  
WDW EM  
SSB 0  
LB 0.30 Hz  
GB 0  
PC 1.00



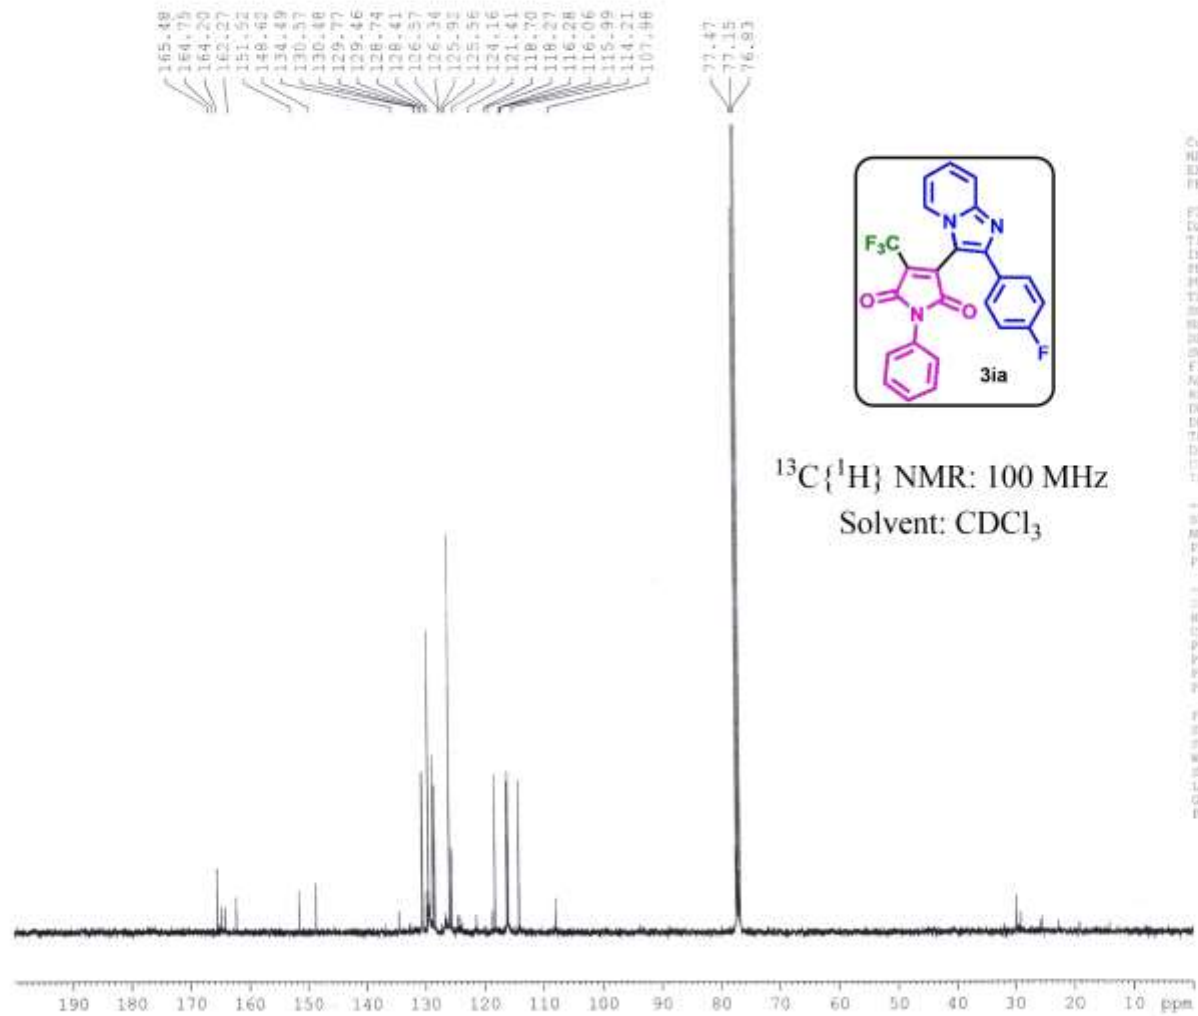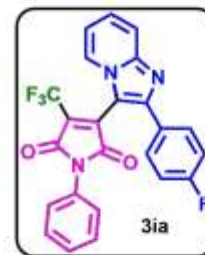

Current Data Parameters  
 NAME: Dr. A RAJAN-2022-13C  
 EXPNO: 455  
 PROCNO: 1

PC - Acquisition Parameters  
 Date\_: 20221219  
 Time: 12.34  
 INSTRUM: spect  
 PROBHD: 5 mm PABBO 1H/1  
 PULPROG: zgpg30  
 TD: 65536  
 SOLVENT: CDCl3  
 NS: 1024  
 DS: 2  
 SWH: 24026.461 Hz  
 FIDRES: 0.7532594 Hz  
 AQ: 0.6615724 sec  
 RG: 385.42  
 DW: 10.400 usec  
 DE: 4.50 usec  
 TE: 300.2 K  
 D1: 2.0000000 sec  
 D11: 0.0000000 sec  
 T20: 1

----- CHANNEL F1 -----  
 NUC1 13C  
 P1 8.90 usec  
 PL1 54.0000000 W

----- CHANNEL F2 -----  
 NUC2 1H  
 SFO2 400.1464014 MHz  
 P2 90.00 usec  
 PL2 11.0000000 W  
 PL12 0.3221000 W  
 PL13 0.14212000 W

PC - Processing parameters  
 SI 32768  
 SF 100.6177664 MHz  
 WDW EM  
 SSB 0  
 LB 1.00 Hz  
 GB 0  
 PC 1.40

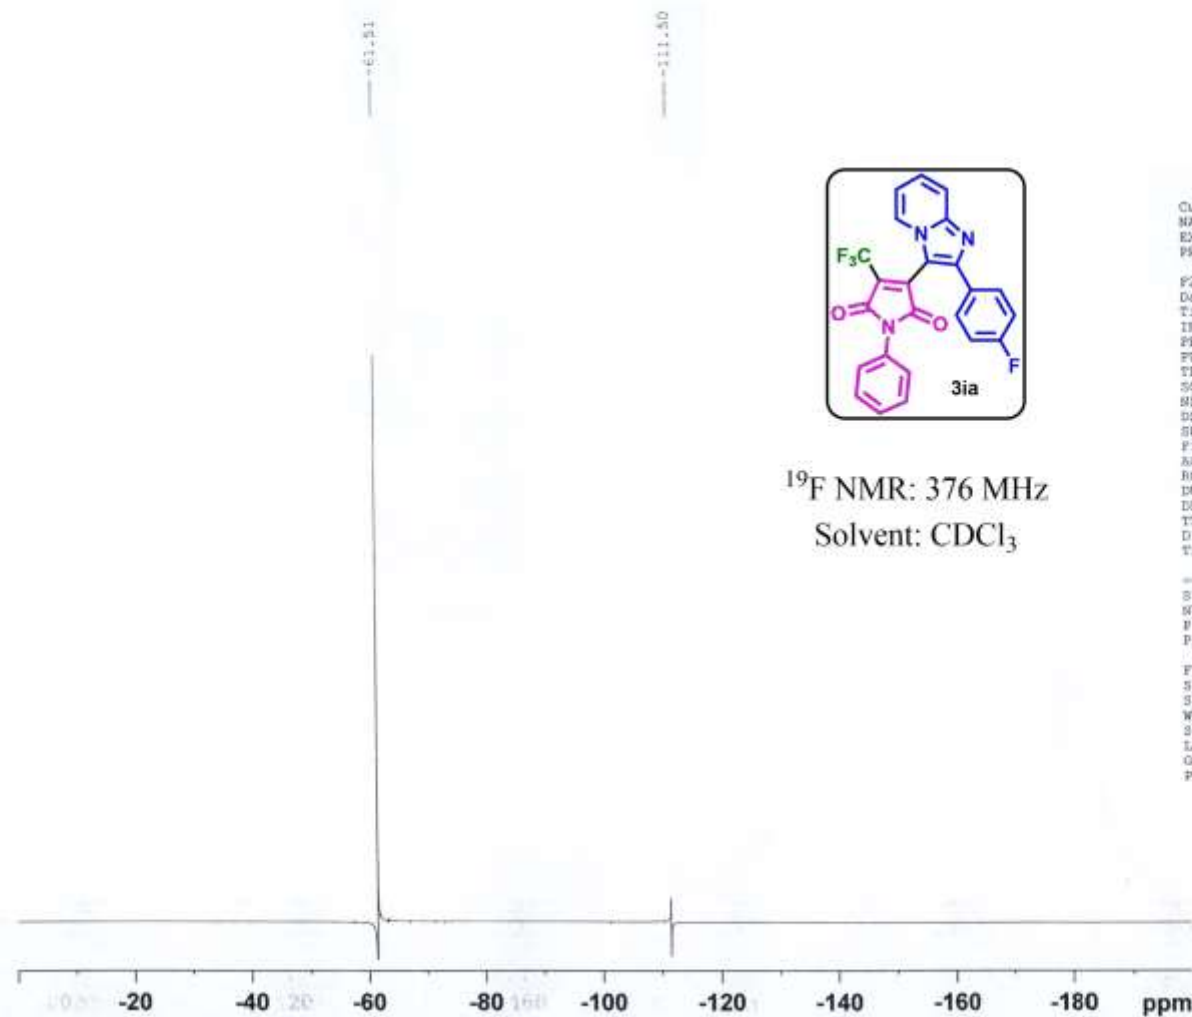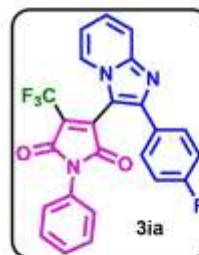

<sup>19</sup>F NMR: 376 MHz  
Solvent: CDCl<sub>3</sub>

Current Data Parameters  
NAME Dr. A NAJRA 2022 1H  
EXPNO 866  
PROCNO 1

F2 - Acquisition Parameters  
Date\_ 20220929  
Time 17.47  
INSTRUM spect  
PROBHD 5 mm PABBO BB/  
PULPROG zgpg30  
TD 32768  
SOLVENT CDCl3  
MS 8  
DS 2  
SWH 89285.711 Hz  
FIDRES 2.724784 Hz  
AQ 0.1835008 sec  
RG 87.66  
DM 5.600 usec  
DE 6.50 usec  
TE 296.5 K  
D1 1.00000000 sec  
TDO 1

----- CHANNEL f1 -----  
SFO1 376.4795333 MHz  
NUC1 19F  
PI 12.50 usec  
PLW1 20.00000000 W

F2 - Processing parameters  
SI 16384  
SF 376.5171850 MHz  
WDW EM  
SSB 0  
LB 0.30 Hz  
GB 0  
PC 1.00

8.075  
 8.063  
 7.750  
 7.770  
 7.604  
 7.584  
 7.503  
 7.485  
 7.466  
 7.450  
 7.430  
 7.356  
 7.337  
 7.259  
 7.038  
 7.021  
 7.006

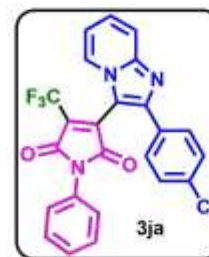

<sup>1</sup>H NMR: 400 MHz  
Solvent: CDCl<sub>3</sub>

Current Data Parameters  
 NAME Dr. A RAJRA 2022 1H  
 EXPNO 399  
 PROCNO 1

F2 - Acquisition Parameters  
 Date\_ 20220410  
 Time 12.52  
 INSTRUM spect  
 PROGHD 5 mm PABBO BB/  
 PULPROG zg30  
 TD 32768  
 SOLVENT CDCl3  
 NS 8  
 DS 2  
 SWS 8223.685 Hz  
 FIDRES 0.250967 Hz  
 AQ 1.9422944 sec  
 RG 106.66  
 SW 60.800 usec  
 DE 6.50 usec  
 TE 297.9 K  
 D1 1.00000000 sec  
 TD0 1

----- CHANNEL f1 -----  
 RF01 400.1524711 MHz  
 NU01 1H  
 P1 14.75 usec  
 PL01 12.00000000 W

F2 - Processing parameters  
 SI 16384  
 SF 400.1500067 MHz  
 MDW EM  
 SSB 0  
 LB 0.30 Hz  
 GB 0  
 PC 1.00

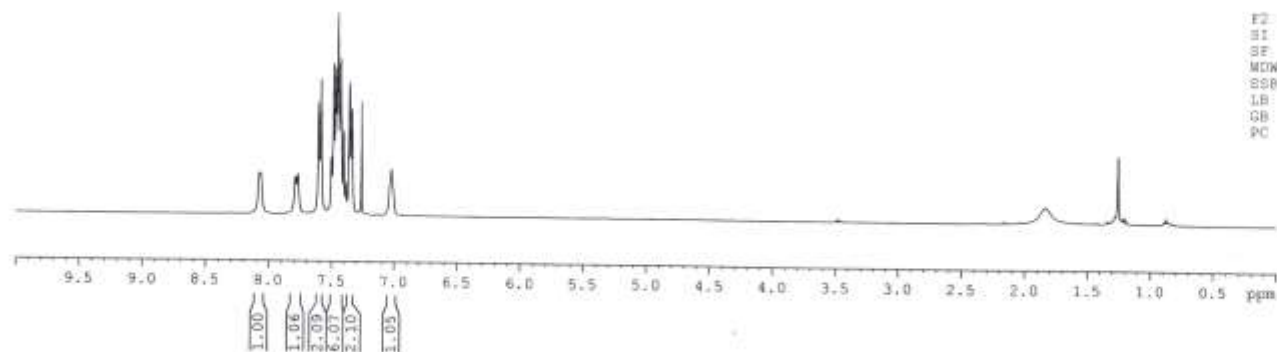

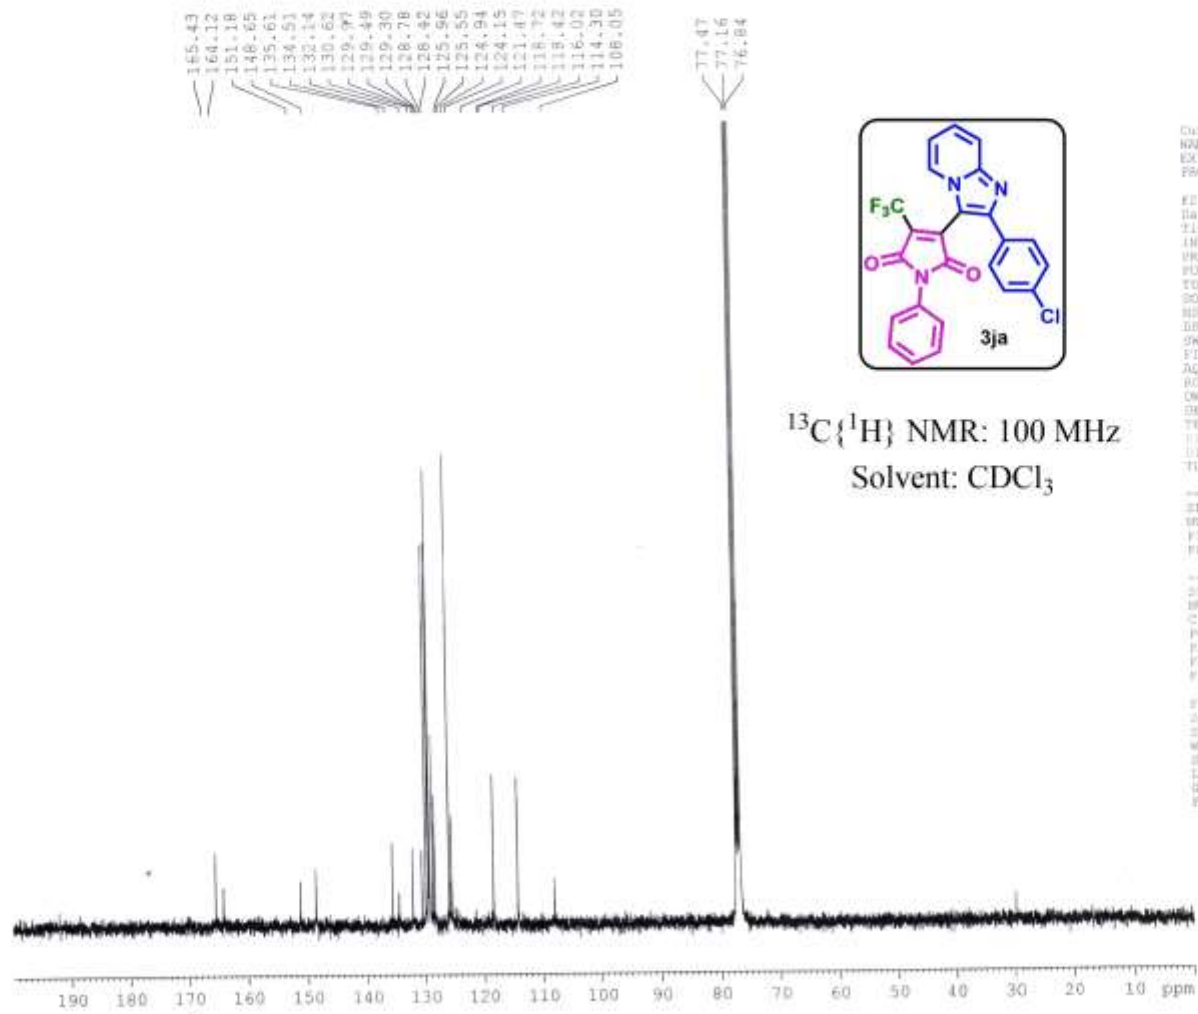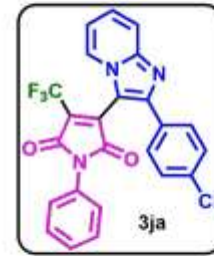

Current Data Parameters  
 NAME: Dr. A. MURRAY-2012-130  
 EXPNO: 109  
 PROCNO: 1

F2 - Acquisition Parameters  
 Date\_: 20120411  
 Time: 22.24  
 INSTRUM: spect  
 PULPROG: zgpg30  
 TO: 12.48  
 SOLVENT: CDCl3  
 NS: 1024  
 DS: 0  
 SWH: 24038.441 Hz  
 FIDRES: 0.753594 Hz  
 AQ: 0.6815744 sec  
 RG: 184.42  
 DW: 10.800 nsec  
 DE: 2.50 nsec  
 TE: 300.2 K  
 FI: 0.0000000 sec  
 DI: 0.0000000 sec  
 TD: 1

CHANNEL F1  
 NU1: 100.6278050 MHz  
 NU2: 120  
 PR: 8.00 usec  
 PLW1: 54.00000000 W

CHANNEL F2  
 NU1: 400.1218000 MHz  
 NU2: 14  
 PR: 8.00 usec  
 PLW2: 12.00000000 W  
 PLW3: 0.32231000 W  
 PLW4: 0.14212000 W

F2 - Processing parameters  
 SI: 16384  
 SF: 100.6177412 MHz  
 WDS: 87  
 LB: 0  
 GB: 0  
 PC: 1.40



—61.46

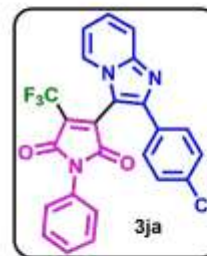

<sup>19</sup>F NMR: 376 MHz  
Solvent: CDCl<sub>3</sub>

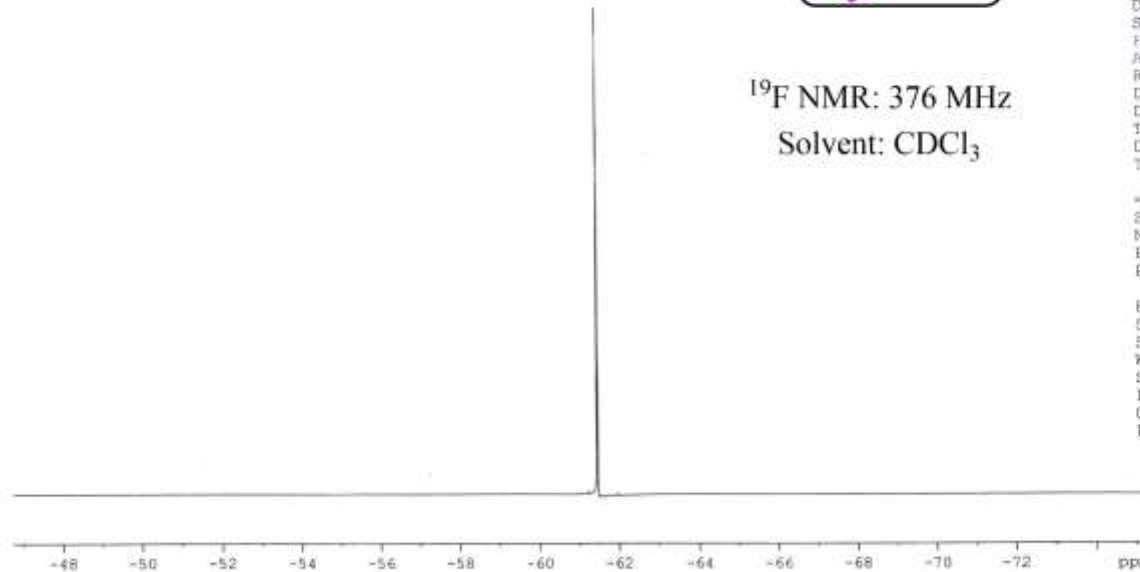

Current Data Parameters  
NAME Dr. A HAJRA 2022 1H  
EXPNO 400  
PROCNO 1

F2 - Acquisition Parameters  
Date\_ 20220410  
Time 12.46  
INSTRUM spect  
PROBHD 5 mm PABBO BB/  
PULPROG zgpg30  
TD 32768  
SOLVENT CDCl3  
NS 8  
DS 2  
SWH 89285.711 Hz  
FIDRES 2.724764 Hz  
AQ 0.1835008 sec  
RG 135.7  
DW 5.600 usec  
DE 6.50 usec  
TE 297.9 K  
D1 1.0000000 sec  
TDO 1

----- CHANNEL f1 -----  
SF01 376.4795333 MHz  
NUC1 19F  
P1 12.50 usec  
PLW1 20.0000000 W

F2 - Processing parameters  
SI 16384  
SF 376.5171850 MHz  
WDW EM  
SSB 0  
LB 0.30 Hz  
GB 0  
PC 1.00

8.098  
8.091  
7.893  
7.782  
7.763  
7.745  
7.725  
7.502  
7.484  
7.464  
7.426  
7.408  
7.388  
7.342  
7.323  
7.260  
7.071  
7.053  
7.037

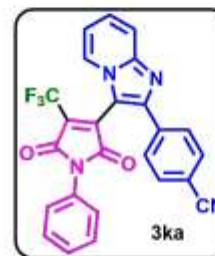

<sup>1</sup>H NMR: 400 MHz  
Solvent: CDCl<sub>3</sub>

Current Data Parameters  
NAME Dr. A HAJRA 2022 1H  
EXPNO 212  
PROCNO 1

F2 - Acquisition Parameters  
Date\_ 20220303  
Time 12.51  
INSTRUM spect  
PROBHD 5 mm F4BBO BB/  
PULPROG zg30  
TD 32768  
SOLVENT CDCl3  
NS 8  
DS 2  
SWH 8223.685 Hz  
FIDRES 0.250967 Hz  
AQ 1.9922944 sec  
RG 106.66  
DM 60.000 usec  
DE 6.50 usec  
TE 294.6 K  
D1 1.00000000 sec  
TDO 1

\*\*\*\*\* CHANNEL f1 \*\*\*\*\*  
SFO1 400.1524711 MHz  
NUC1 1H  
P1 14.75 usec  
PLW1 12.00000000 W

F2 - Processing parameters  
SI 16384  
SF 400.1500086 MHz  
WDW EM  
SSB 0  
LB 0.30 Hz  
GB 0  
PC 1.00

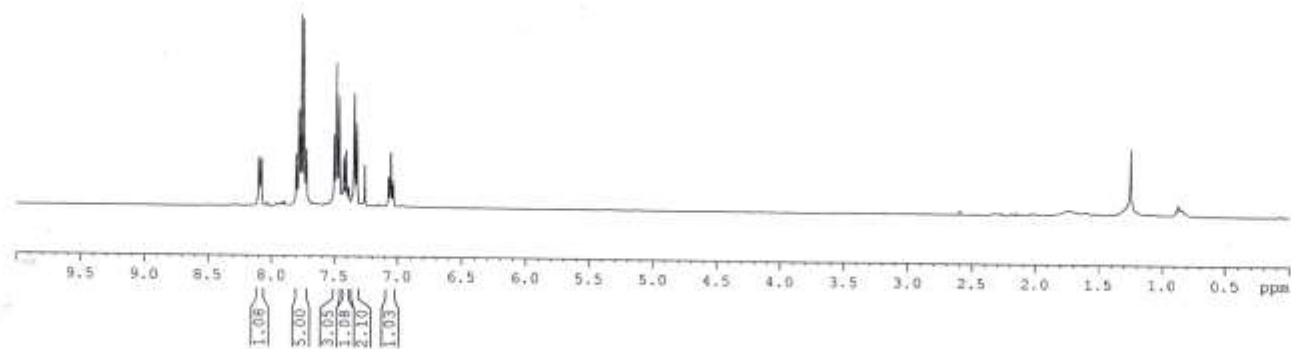

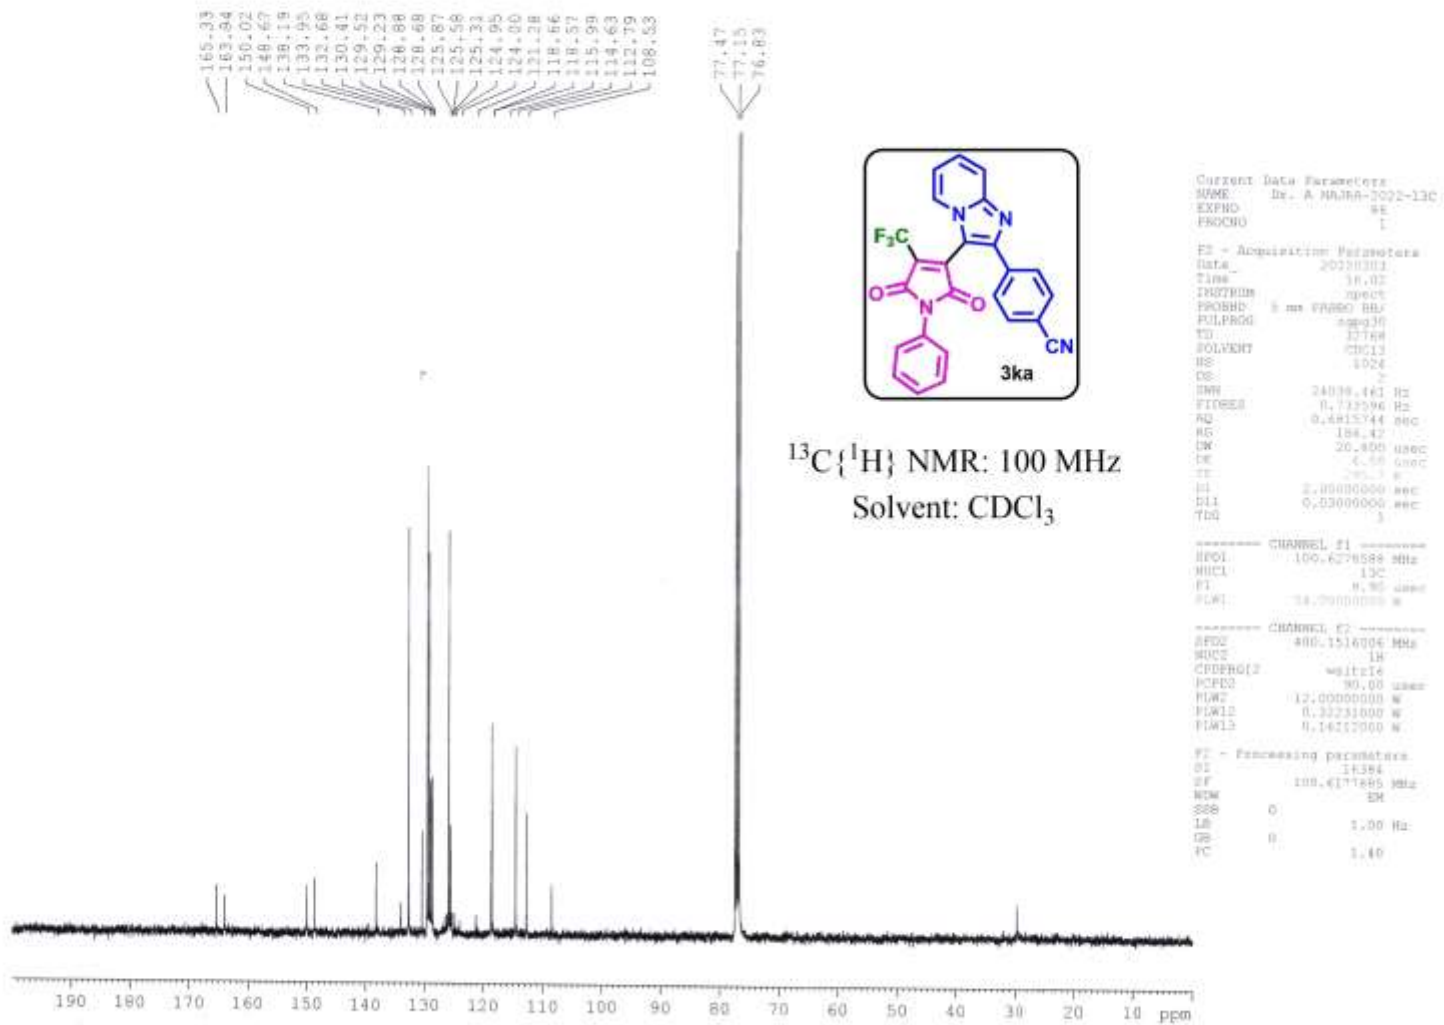

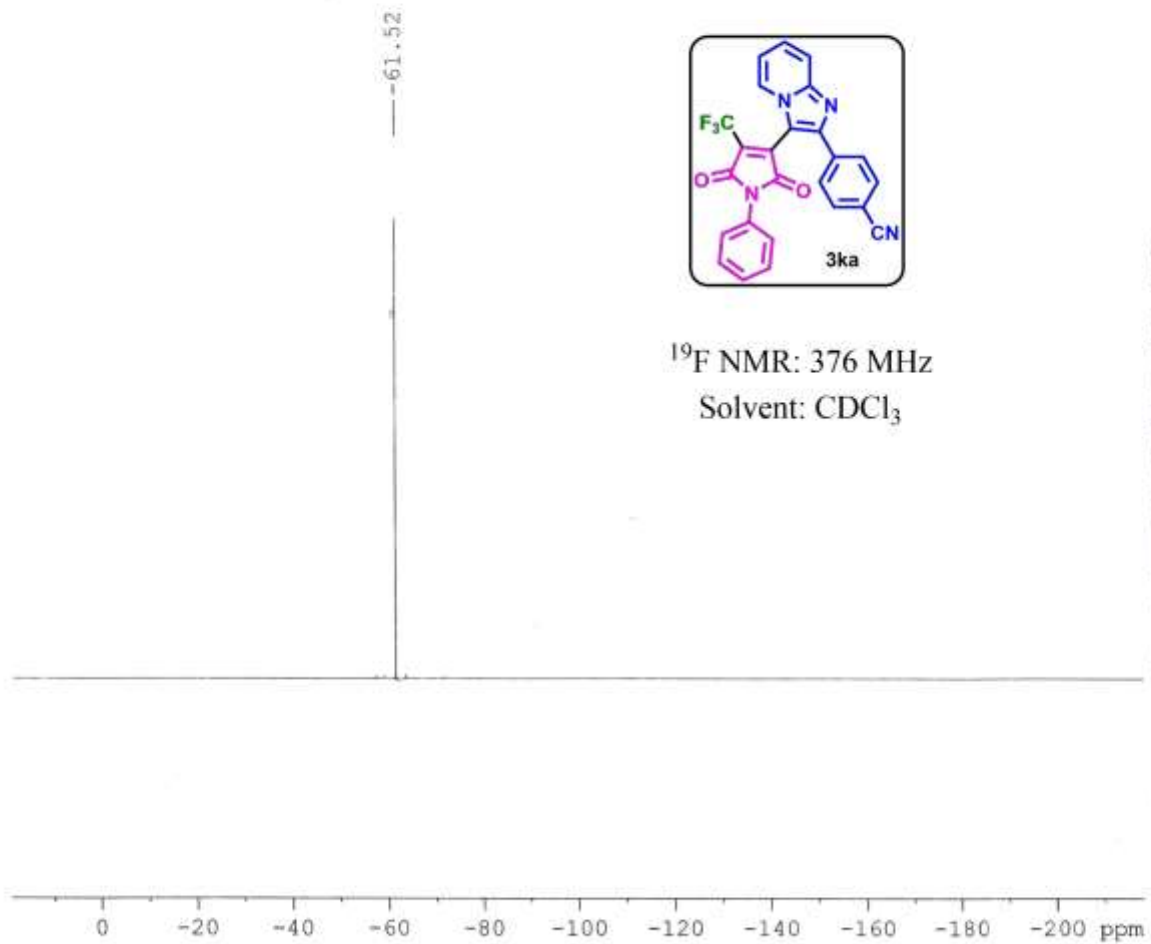

Current Data Parameters  
 NAME Dr. A. HAJRA, 2022.1H  
 EXPNO 207  
 PROCNO 1

F2 - Acquisition Parameters  
 Date\_ 20220303  
 Time\_ 6:46  
 INSTRUM spect  
 PROBHD 5 mm PABBO BB/  
 PULPROG zgpg30  
 TD 32768  
 SOLVENT CDCl3  
 NS 4  
 DS 2  
 SWH 89285.711 Hz  
 FIDRES 2.724764 Hz  
 AQ 0.1835008 sec  
 RG 186.42  
 DW 5.600 usec  
 DE 6.50 usec  
 TE 297.0 K  
 D1 1.0000000 sec  
 TDO 1

\*\*\*\*\* CHANNEL f1 \*\*\*\*\*  
 SF01 376.4795333 MHz  
 NUC1 19F  
 P1 12.50 usec  
 PLW1 20.0000000 W

F2 - Processing parameters  
 S1 16384  
 SF 376.5171850 MHz  
 WDW EM  
 SSB 0  
 LB 0.30 Hz  
 GB 0  
 PC 1.00

8.079  
8.061  
7.876  
7.796  
7.774  
7.561  
7.537  
7.514  
7.502  
7.484  
7.481  
7.464  
7.439  
7.425  
7.412  
7.407  
7.392  
7.388  
7.360  
7.357  
7.357  
7.336  
7.316  
7.286  
7.259  
7.045  
7.029  
7.012

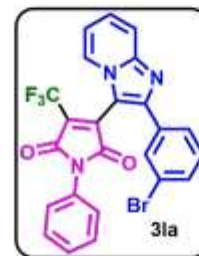

<sup>1</sup>H NMR: 400 MHz  
Solvent: CDCl<sub>3</sub>

Current Data Parameters  
NAME Dr. A HAJRA 2022 1R  
EXPNO 857  
PROCNO 1

F2 - Acquisition Parameters  
Date\_ 20220927  
Time 16.35  
INSTRUM spect  
PROBHD 5 mm PABBO BB/  
PULPROG zg30  
TD 32768  
SOLVENT CDCl3  
NS 8  
DS 2  
SWH 8223.685 Hz  
FIDRES 0.250967 Hz  
AQ 1.9922944 sec  
RG 168.31  
DW 60.800 usec  
DE 6.50 usec  
TE 297.1 K  
D1 1.00000000 sec  
TDO 1

----- CHANNEL f1 -----  
SFO1 400.1524711 MHz  
NUC1 1H  
P1 14.75 usec  
PLM1 12.00000000 W

F2 - Processing parameters  
SI 16384  
SF 400.1500086 MHz  
WDW EM  
SSB 0  
LB 0.30 Hz  
GB 0  
PC 1.00

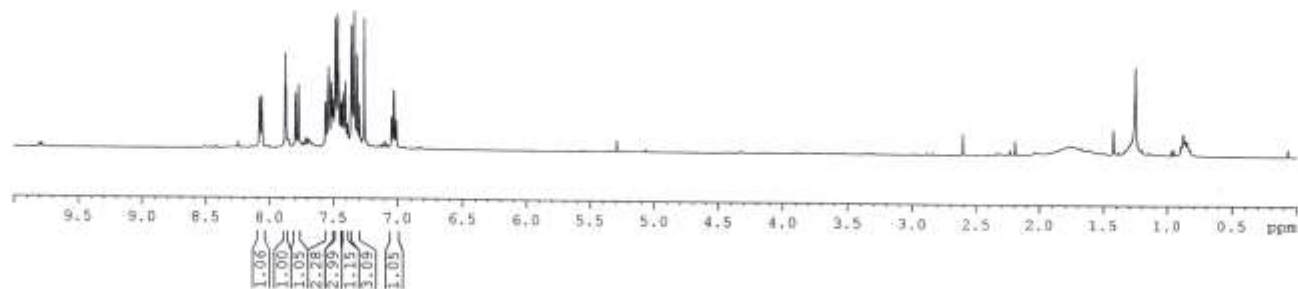

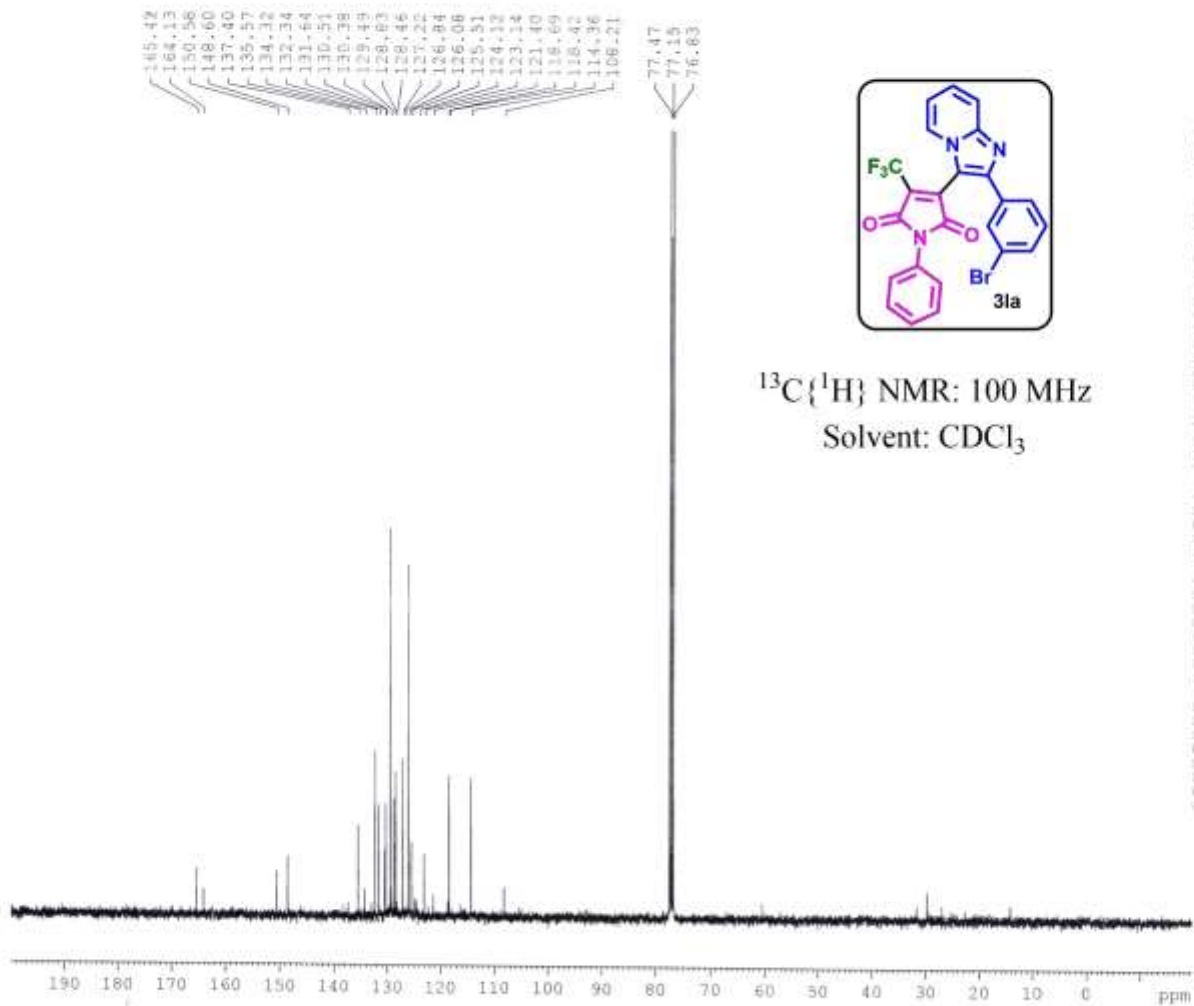

Current Data Parameters  
 NAME: Dr. A RAJIA-S22-2K  
 EXPNO: 343  
 PROCNO: 1

PC - Acquisition Parameters  
 Date\_: 20200521  
 Time: 11.29  
 INSTRUM: spect  
 PULPROG: zgpg30  
 F2 - 100.6261500 MHz  
 F1: 0.0000000 MHz  
 SOLVENT:  $\text{CDCl}_3$   
 NS: 2  
 DS: 2  
 SWH: 24028.441 Hz  
 FIDRES: 0.723594 Hz  
 AQ: 0.4915744 sec  
 RG: 306.64  
 DW: 20.800 usec  
 DE: 8.50 usec  
 TE: 294.2 K  
 D1: 2.0000000 sec  
 D11: 0.0300000 sec  
 TD: 1

===== CHANNEL f1 =====  
 CPDPRG1: 100.6274000 MHz  
 NUC1:  $^{13}\text{C}$   
 P1: 8.90 usec  
 PL1: 54.0000000 W

===== CHANNEL f2 =====  
 CPDPRG2: waltz16  
 F2 - 400.1514000 MHz  
 NUC2:  $^1\text{H}$   
 P2: 95.00 usec  
 PL2: 12.0000000 W  
 PL12: 0.22231000 W  
 PL13: 0.14212000 W

F2 - Processing parameters  
 SI: 16384  
 SF: 100.6177462 MHz  
 WDM: 0  
 SSB: 0  
 LB: 1.00 Hz  
 GB: 0  
 PC: 1.40

-61.43

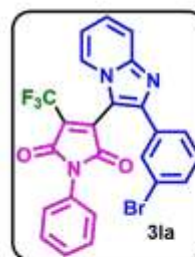

$^{19}\text{F}$  NMR: 376 MHz  
Solvent:  $\text{CDCl}_3$

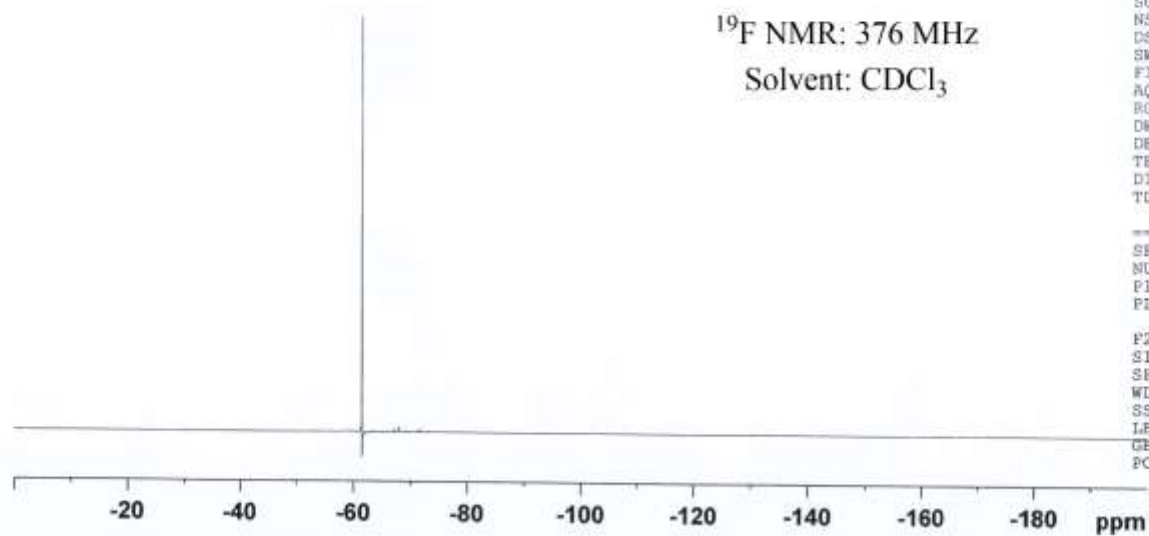

Current Data Parameters  
NAME Dr. A HAJRA 2022 1H  
EXPNO 676  
PROCNO 1

F2 - Acquisition Parameters  
Date\_ 20220719  
Time 18.33  
INSTRUM spect  
PROBHD 5 mm PABBO BB/  
PULPROG zgpg30  
TD 32768  
SOLVENT  $\text{CDCl}_3$   
NS 8  
DS 2  
SWH 89285.711 Hz  
FIDRES 2.724784 Hz  
AQ 0.1835008 sec  
RG 186.42  
DM 5.600 usec  
DE 6.50 usec  
TE 296.5 K  
D1 1.00000000 sec  
TDO 1

----- CHANNEL f1 -----  
SF01 376.4795333 MHz  
NUC1 19F  
P1 12.50 usec  
PLW1 20.00000000 W

F2 - Processing parameters  
SI 16384  
SF 376.5171850 MHz  
WDW EM  
SSB 0  
LB 0.30 Hz  
GB 0  
PC 1.00

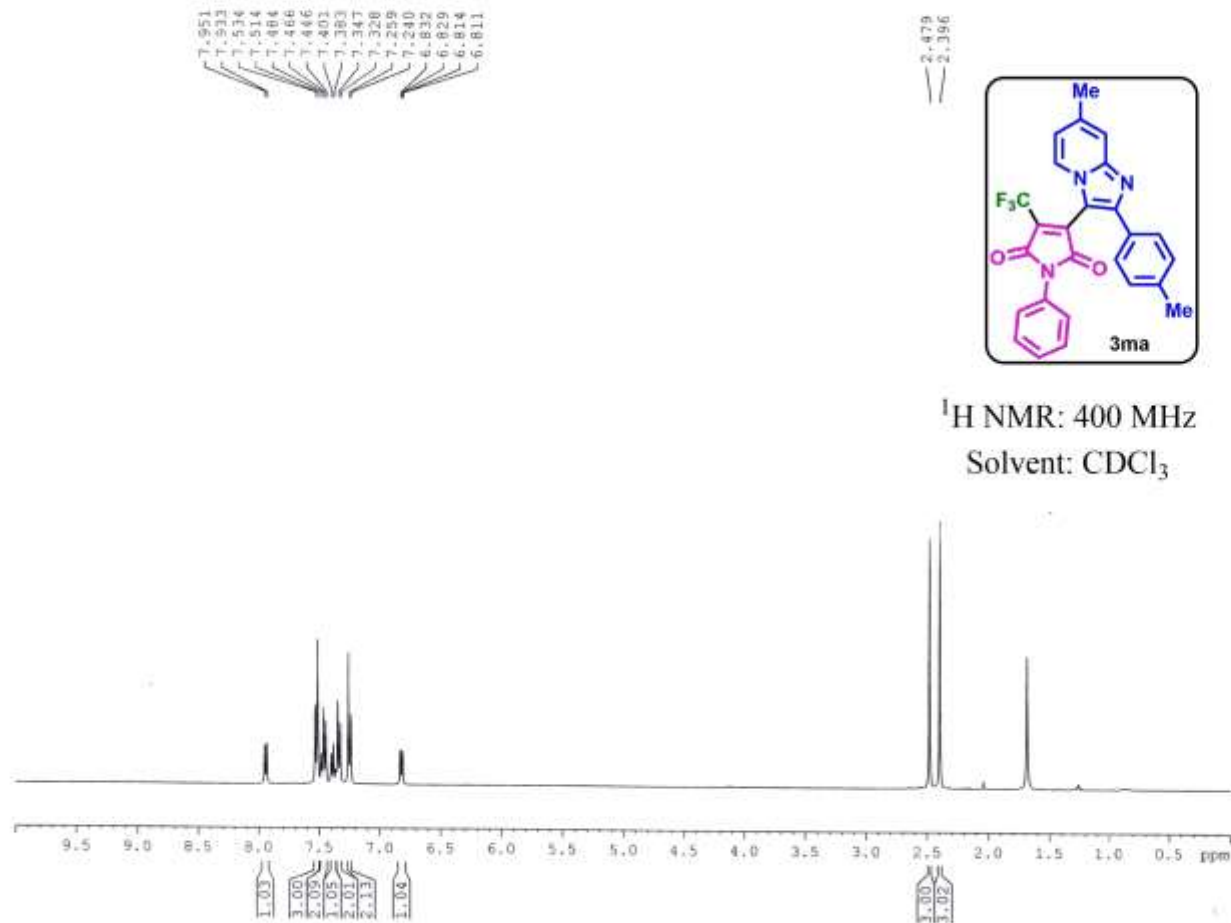

Current Data Parameters  
NAME Dr. A HAJRA 2022 1H  
EXPNO 600  
PROCNO 1

F2 - Acquisition Parameters  
Date\_ 20220621  
Time\_ 12.40  
INSTRUM spect  
PROBHD 5 mm PABBO BB/  
PULPROG zg30  
TD 32768  
SOLVENT CDCl<sub>3</sub>  
NS 8  
DS 2  
SWH 8221.685 Hz  
FIDRES 0.250867 Hz  
AQ 1.9922944 sec  
RG 135.7  
DW 60.800 usec  
DE 8.50 usec  
TE 297.6 K  
D1 1.00000000 sec  
TD0 1

----- CHANNEL f1 -----  
SFO1 400.1524711 MHz  
WIC1 1H  
F1 14.75 usec  
PLW1 12.00000000 W

F2 - Processing parameters  
SI 16384  
SF 400.1500086 MHz  
WDW EM  
SBB 0  
LB 0.30 Hz  
GB 0  
PC 1.00



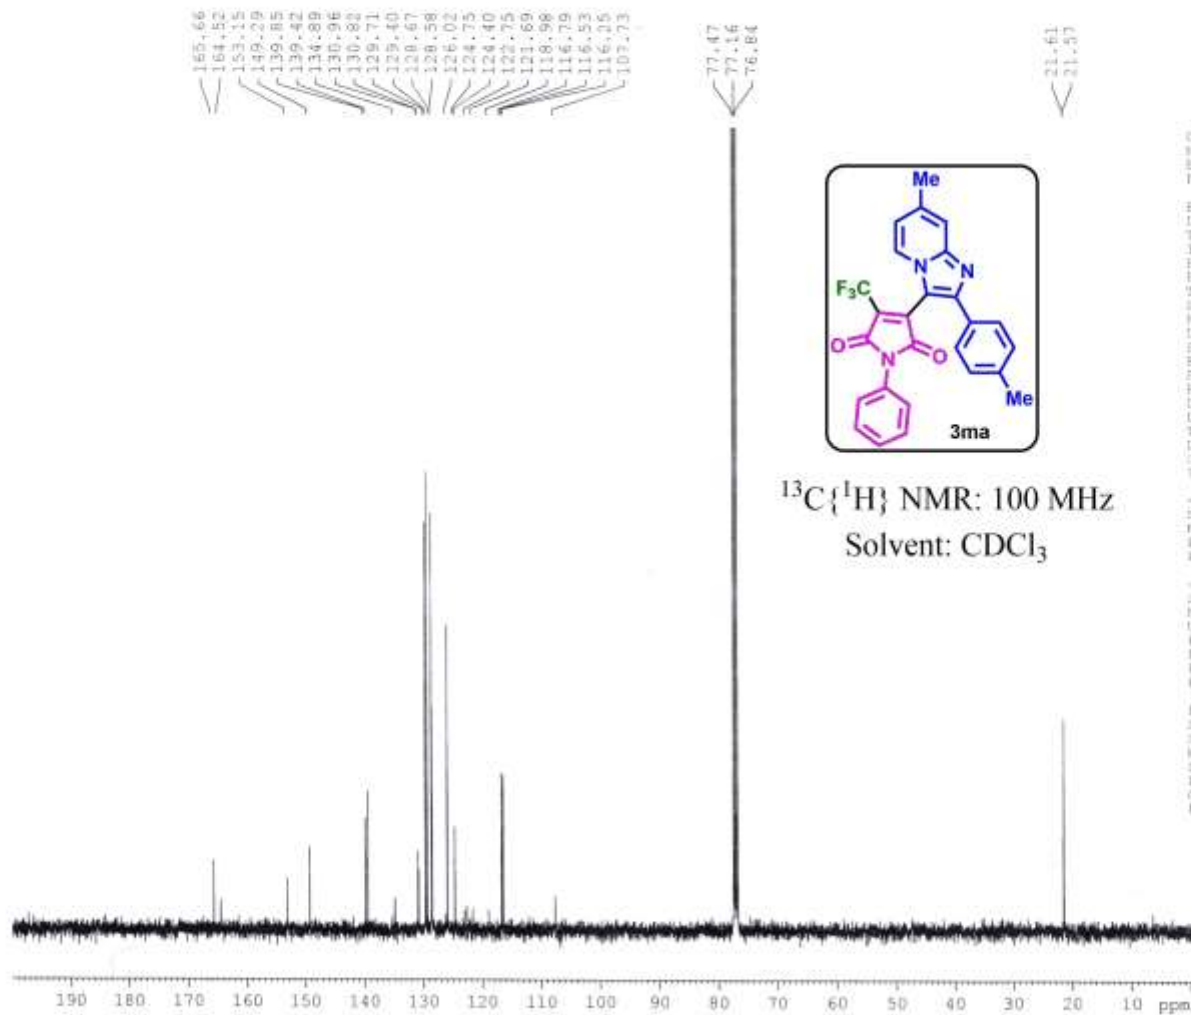

Current Data Parameters  
NAME: Dr. A RADIA-2022-13c  
EXPNO: 237  
PROCNO: 1

F2 - Acquisition Parameters  
Date\_: 20220421  
Time: 13.19  
INSTRUM: spect  
PROBHD: 5 mm VBBB0 mh/  
PULPROG: zgpg30  
VD: 12.148  
SOLVENT: CDCl3  
NS: 120  
DS: 2  
SWH: 26036.461 Hz  
FIDRES: 0.733596 Hz  
AQ: 0.4815744 sec  
RG: 186.42  
DW: 20.800 usec  
DE: 4.50 usec  
TE: 298.1 K  
D1: 2.00000000 sec  
d11: 0.20000000 sec  
TD0: 1

----- CHANNEL f1 -----  
NUC1: 13C  
P1: 8.90 usec  
PL1: 54.00000000 W  
----- CHANNEL f2 -----  
NUC2: 1H  
P2: 1.00 usec  
PL2: 0.00000000 W

F2 - Processing parameters  
SI: 16384  
SF: 100.6177843 MHz  
WDW: EM  
SSB: 0  
LB: 1.00 Hz  
GB: 0  
PC: 1.40

-61.23

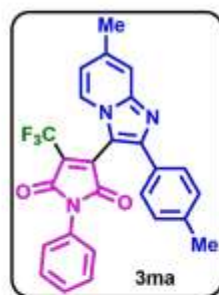

$^{19}\text{F}$  NMR: 376 MHz  
Solvent:  $\text{CDCl}_3$

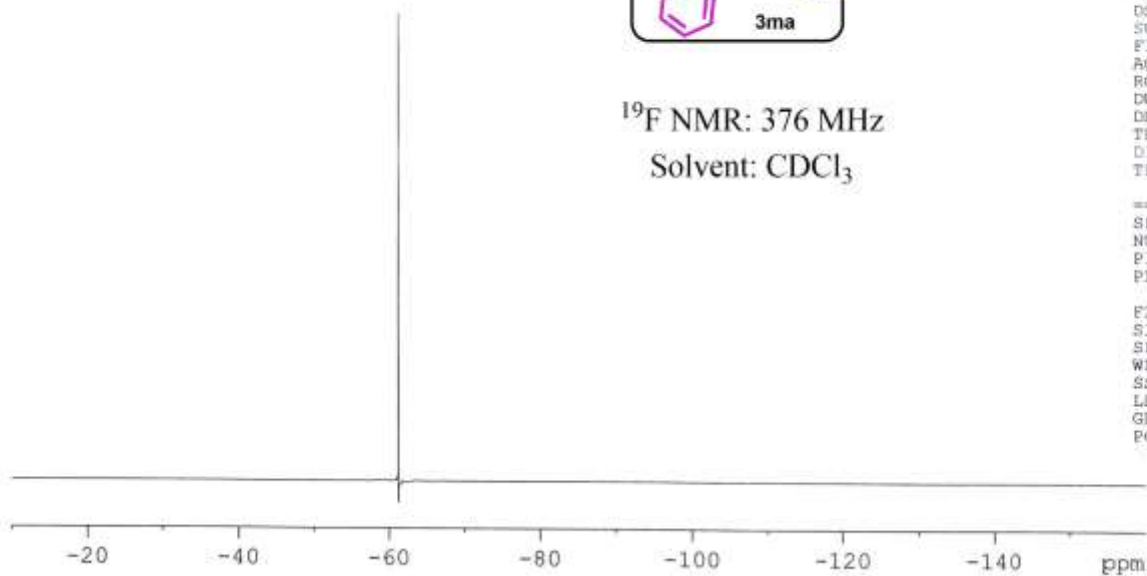

Current Data Parameters  
NAME Dr. A HAJRA 2022\_1H  
EXPNO 601  
PROCNO 1

F2 - Acquisition Parameters  
Date\_ 20220621  
Time 12.44  
INSTRUM spect  
PROBHD 5 mm PABBO BB/  
PULPROG zgpg30  
TD 32768  
SOLVENT  $\text{CDCl}_3$   
NS 8  
DS 2  
SWH 89285.711 Hz  
FIDRES 2.724784 Hz  
AQ 0.1835008 sec  
RG 186.42  
DW 5.600 usec  
DE 6.50 usec  
TE 297.6 K  
D1 1.00000000 sec  
TD0 1

----- CHANNEL f1 -----  
SFO1 376.4795333 MHz  
NUC1 19F  
P1 12.50 usec  
PLW1 20.00000000 W

F2 - Processing parameters  
SI 16384  
SF 376.5171850 MHz  
WDW EM  
SSB 0  
LB 0.30 Hz  
GB 0  
PC 1.00

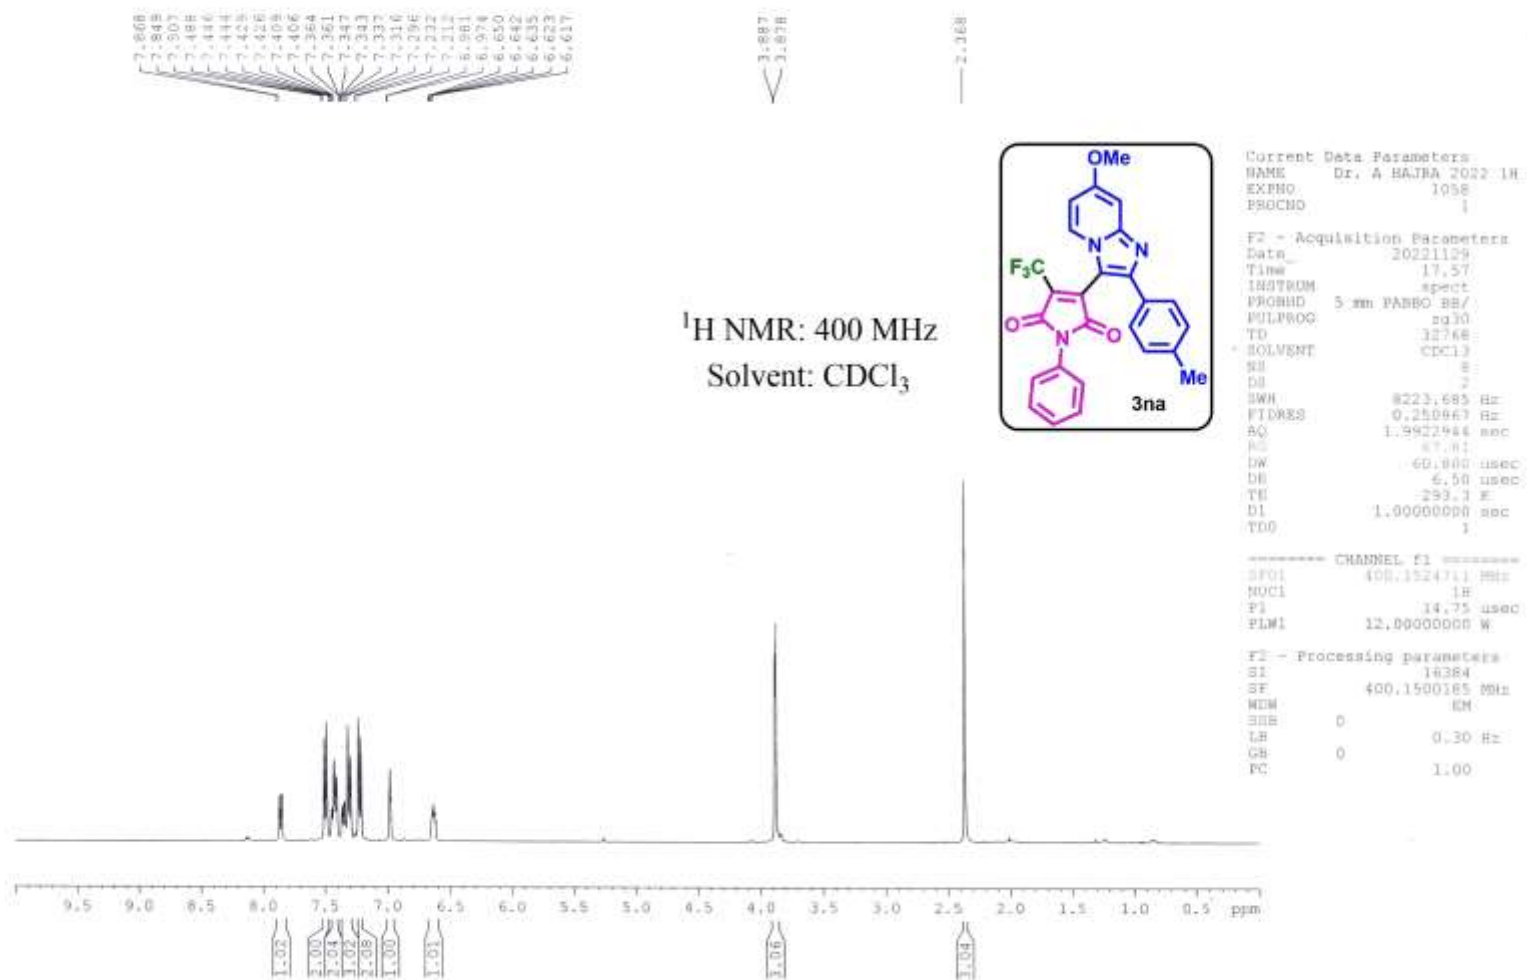

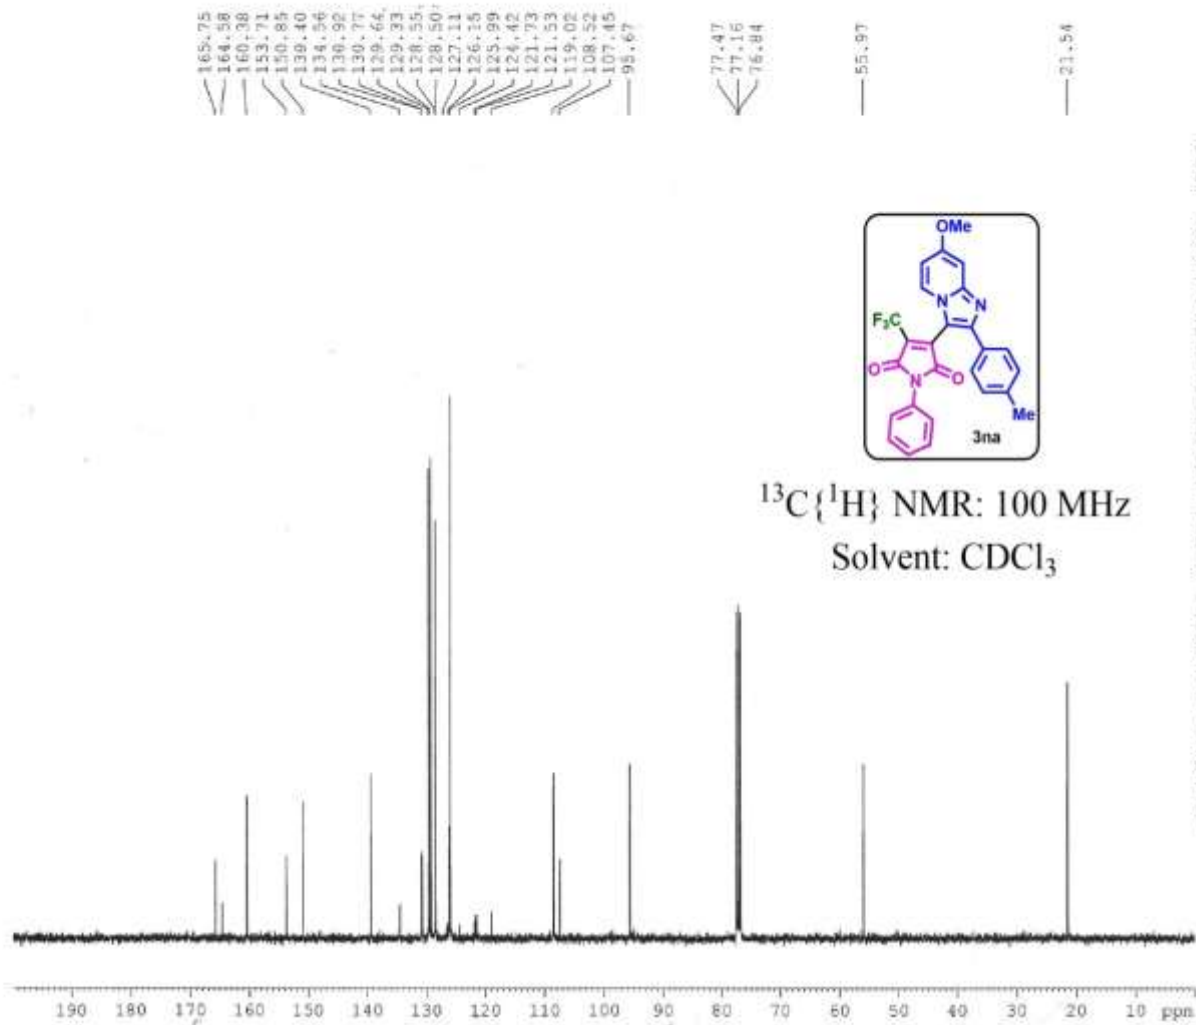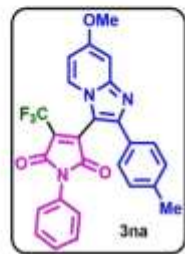

$^{13}\text{C}\{^1\text{H}\}$  NMR: 100 MHz  
Solvent:  $\text{CDCl}_3$

Current Data Parameters  
NAME Dr. A RAJRA-1022-13C  
EXPNO 422  
PROCNO 1

F2 - Acquisition Parameters  
Date\_ 20221129  
Time 18.26  
INSTRUM spect  
PROCNO 1 on F400 807  
PULPROG zgpg30  
TE 325.8  
SOLVENT cdcl3  
NS 100  
DS 2  
SWH 24028.463 Hz  
FIDRES 0.733596 Hz  
AQ 0.6815744 sec  
RG 186.43  
OW 20.406 usec  
DE 4.54 usec  
TE 293.3 K  
D1 2.00000000 sec  
D11 0.05000000 sec  
TD 1

----- CHANNEL f1 -----  
SFO1 100.6278588 MHz  
NUC1 13C  
P1 8.90 usec  
PLW1 54.00000000 W

----- CHANNEL f2 -----  
SFO2 400.1514004 MHz  
NUC2 1H  
PCPD012 waltz16  
PCPD2 90.00 usec  
PLW2 12.00000000 W  
PLW3 0.32231000 W  
PLW4 0.14212000 W

F2 - Processing parameters  
SI 16384  
SF 100.6177904 MHz  
WDW EM  
SSB 0 1.00 Hz  
GB 0  
PC 1.40

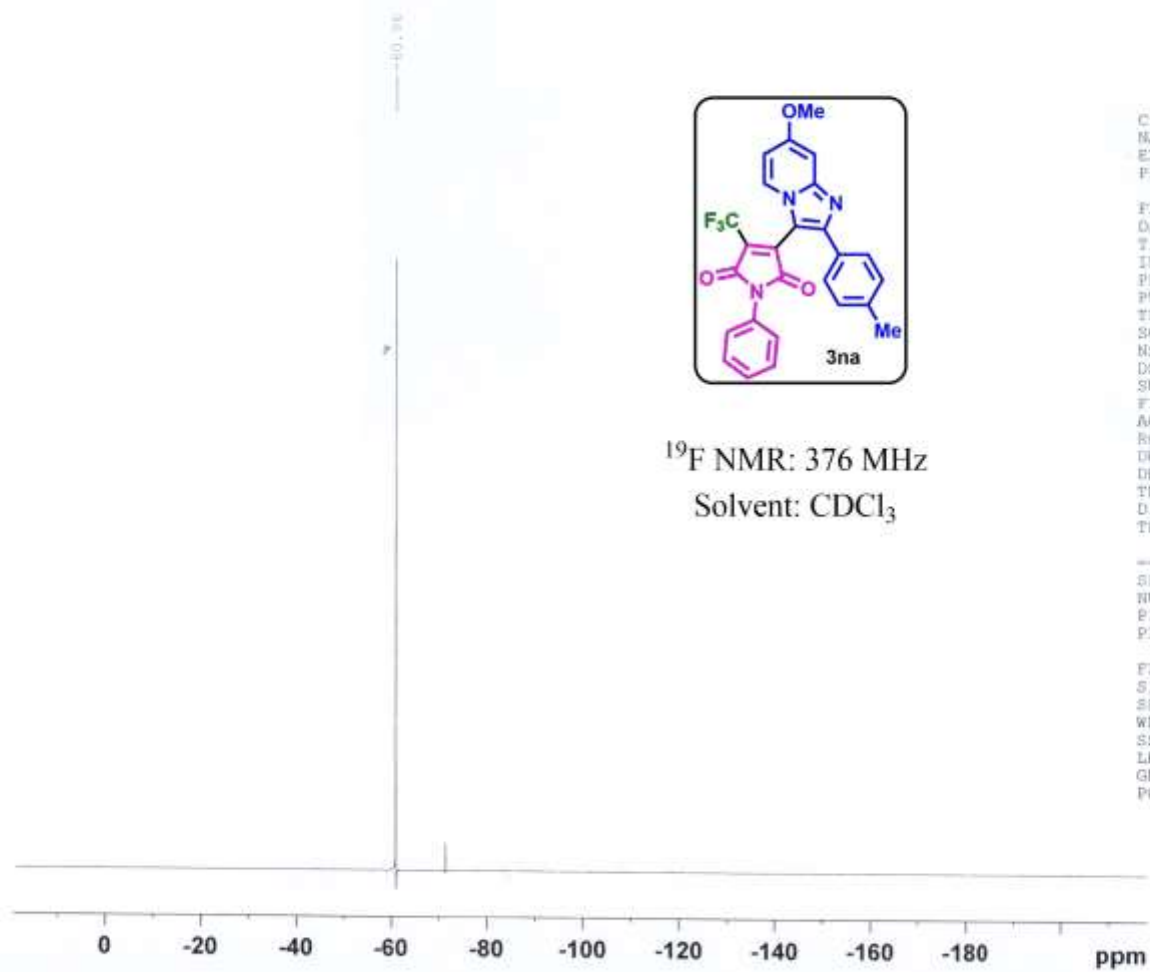

Current Data Parameters  
 NAME Dr. A HAJRA 2022 18  
 EXPNO 1059  
 PROCNO 1

F2 - Acquisition Parameters  
 Date 20221129  
 Time 18.07  
 INSTRUM spect  
 PROBHD 5 mm PABBO BB/  
 PULPROG zgpg30  
 TD 32768  
 SOLVENT CDCl3  
 NS 8  
 DS 2  
 SWH 89285.711 Hz  
 FIDRES 2.724784 Hz  
 AQ 0.1835008 sec  
 RG 186.42  
 DW 5.600 usec  
 DE 6.50 usec  
 TE 293.2 K  
 D1 1.00000000 sec  
 TDO 1

----- CHANNEL f1 -----  
 SFO1 376.4795333 MHz  
 NUCL1 19F  
 P1 12.50 usec  
 PLW1 20.00000000 W

F2 - Processing parameters  
 SI 16384  
 SF 376.5171850 MHz  
 WDW EM  
 SSB 0  
 LB 0.30 Hz  
 GB 0  
 PC 1.00

8.186  
8.111  
8.094  
7.944  
7.922  
7.906  
7.894  
7.882  
7.869  
7.838  
7.815  
7.755  
7.733  
7.730  
7.540  
7.534  
7.520  
7.527  
7.523  
7.517  
7.490  
7.471  
7.450  
7.431  
7.412  
7.382  
7.364  
7.284  
7.275  
1.690  
1.036  
1.022

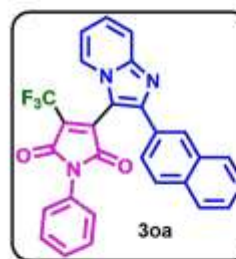

<sup>1</sup>H NMR: 400 MHz  
Solvent: CDCl<sub>3</sub>

Current Data Parameters  
NAME Dr. A RAJRA 2022 1H  
EXPNO 568  
PROCNO 1

F2 - Acquisition Parameters  
Date\_ 20220618  
Time 19.24  
INSTRUM spect  
PROBHD 5 mm PABBO BB/  
PULPROG zg30  
TD 32768  
SOLVENT CDCl3  
NS 8  
DS 2  
SWH 8223.685 Hz  
FIDRES 0.250967 Hz  
AQ 1.9922944 sec  
RG 186.42  
DM 60.800 usec  
DE 6.50 usec  
TE 296.9 K  
D1 1.00000000 sec  
TDO 1

----- CHANNEL f1 -----  
SFO1 400.1524711 MHz  
NUC1 1H  
P1 14.75 usec  
PLW1 12.00000000 W

F2 - Processing parameters  
SI 16384  
SF 400.1500087 MHz  
WDW EM  
SSB 0  
LB 0.30 Hz  
GB 0  
PC 1.00

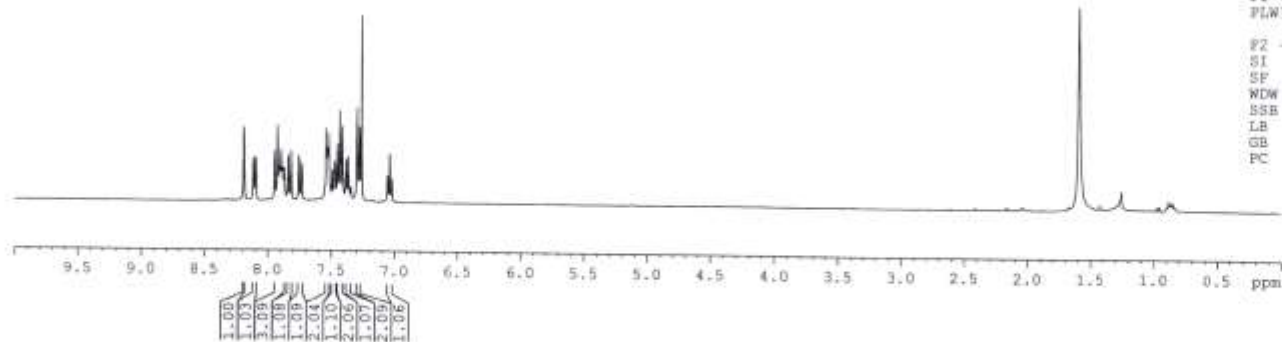

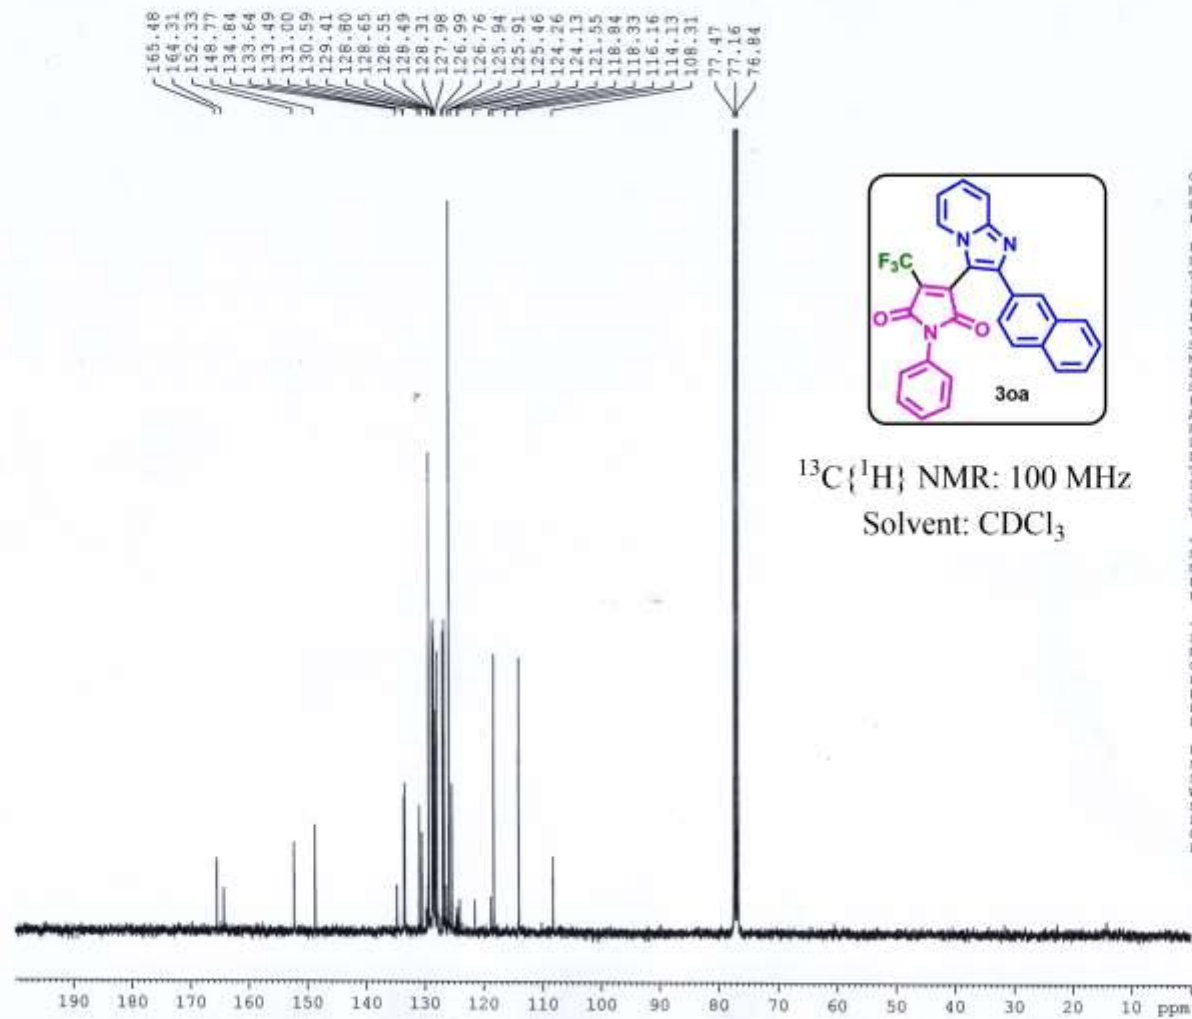

Current Data Parameters  
NAME Dr. A HAJRA-2022-13C  
EXPHO 454  
PROCNO 1

F2 - Acquisition Parameters  
Date\_ 20221219  
Time\_ 11.05  
INSTRUM spect  
PROBHD 5 mm PABBO BBI  
PULPROG zgpg30  
TD 32768  
SOLVENT CDCl3  
NS 1024  
DS 2  
SWH 24038.461 Hz  
FIDRES 0.733596 Hz  
AQ 0.4815744 sec  
RG 184.42  
DW 20.800 usec  
DE 6.50 usec  
TE 292.8 K  
D1 2.0000000 sec  
D11 0.8300000 sec  
YD0 1

----- CHANNEL F1 -----  
SFO1 100.6278566 MHz  
NUC1 13C  
P1 8.90 usec  
PLW1 54.00000000 W

----- CHANNEL F2 -----  
SFO2 400.1516006 MHz  
NUC2 1H  
CDEPRG12 waltz16  
PCPD 90.00 usec  
PLW2 12.00000000 W  
PLW12 0.32231000 W  
PLW13 0.16212000 W

F2 - Processing parameters  
SI 16384  
SF 100.6177892 MHz  
WEW EM  
SSB 0  
LB 1.00 Hz  
GB 0  
PC 1.40

---61.33

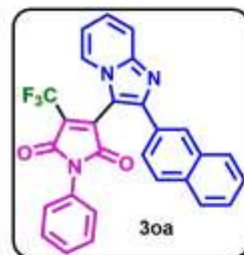

$^{19}\text{F}$  NMR: 376 MHz  
Solvent:  $\text{CDCl}_3$

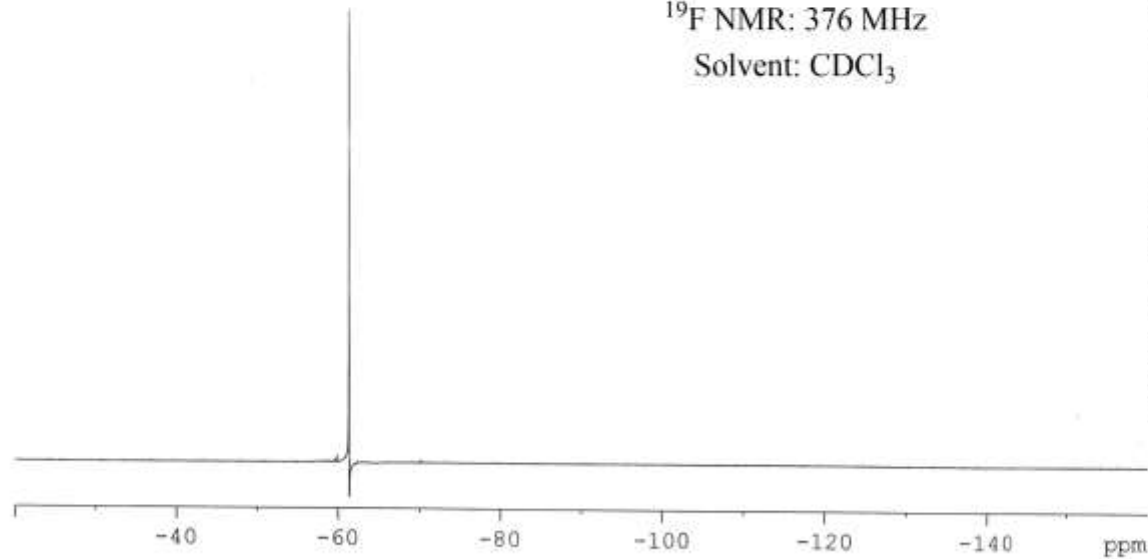

Current Data Parameters  
NAME Dr. A HAJRA 2022 1H  
EXPNO 574  
PROCNO 1

F2 - Acquisition Parameters  
Date\_ 20220617  
Time\_ 16.09  
INSTRUM spect  
PROBHD 5 mm PABBO BB/  
PULPROG zgpg30  
TD 32768  
SOLVENT  $\text{CDCl}_3$   
NS 8  
DS 2  
SWH 89285.711 Hz  
FIDRES 2.724784 Hz  
AQ 0.1835008 sec  
RG 186.42  
DW 5.600 usec  
DE 6.50 usec  
TE 297.7 K  
D1 1.00000000 sec  
TD0 1

===== CHANNEL f1 =====  
SFO1 376.4795333 MHz  
NUC1 19F  
P1 12.50 usec  
PLW1 20.00000000 W

F2 - Processing parameters  
SI 16384  
SF 376.5171850 MHz  
WDW EM  
SSB 0  
LB 0.30 Hz  
GB 0  
PC 1.00



0.060  
 7.631  
 7.470  
 7.431  
 7.414  
 7.396  
 7.262  
 7.259

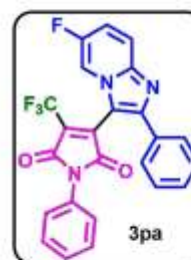

<sup>1</sup>H NMR: 400 MHz  
Solvent: CDCl<sub>3</sub>

Current Data Parameters  
 NAME Dr. A HAJRA 2024 1H  
 EXPNO 18  
 PROCNO 1

F2 - Acquisition Parameters  
 Date\_ 20240105  
 Time 12.21  
 INSTRUM spect  
 PROBHD 5 mm PABBO BB/  
 PULPROG zg30  
 TD 32768  
 SOLVENT CDCl3  
 NS 8  
 DS 2  
 SWH 8223.685 Hz  
 FIDRES 0.250967 Hz  
 AQ 1.9922944 sec  
 RG 148.91  
 DW 40.800 usec  
 DE 6.50 usec  
 TE 290.7 K  
 D1 1.00000000 sec  
 TDO 1

----- CHANNEL f1 -----  
 SFO1 400.1524711 MHz  
 NUC1 1H  
 P1 14.75 usec  
 PLW1 12.00000000 W

F2 - Processing parameters  
 SI 16384  
 SF 400.1500096 MHz  
 WDW EM  
 SSB 0  
 LB 0.30 Hz  
 GB 0  
 PC 1.00

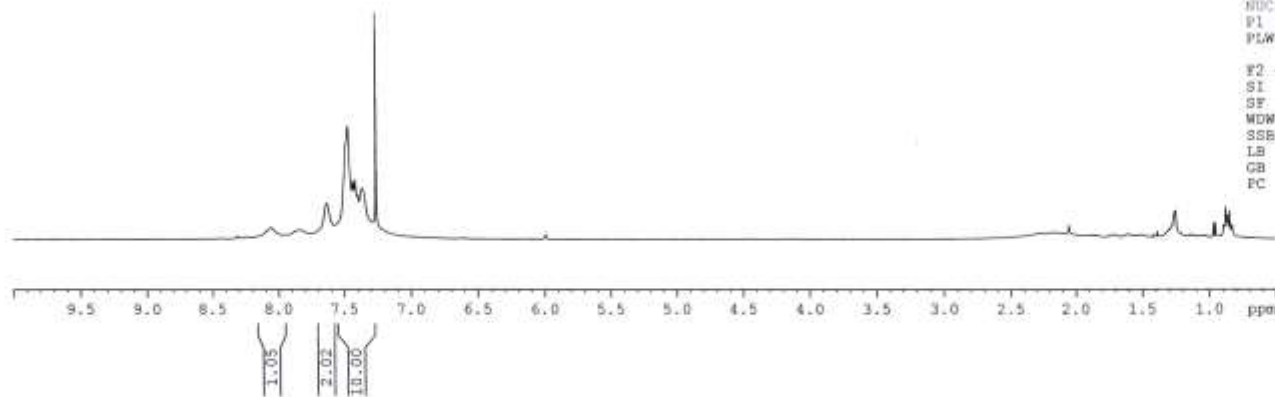

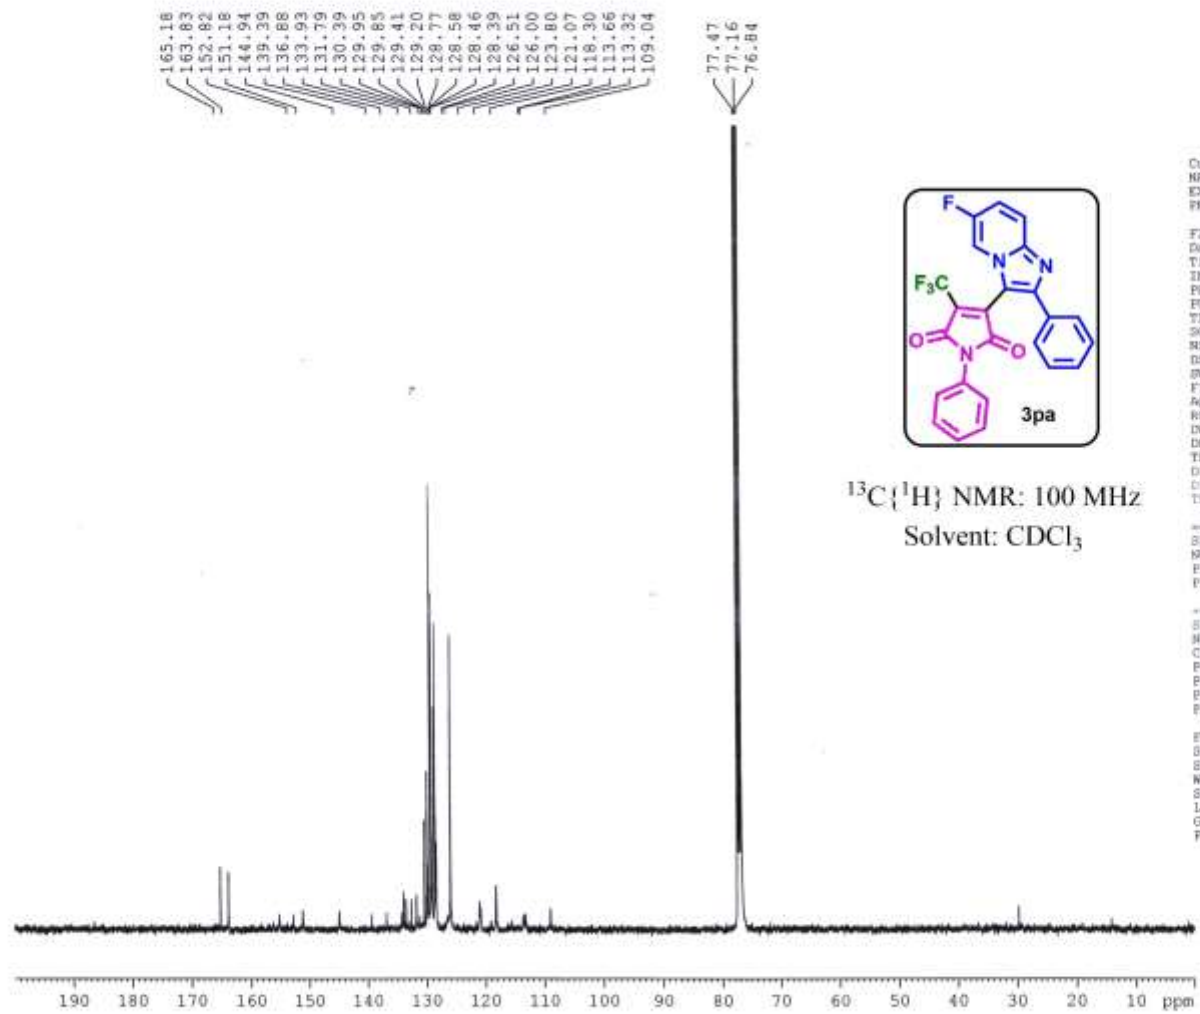

Current Data Parameters  
NAME Dr. A RAJRA-2024-13C  
EXPNO 11  
PROCNO 1

F2 - Acquisition Parameters  
Date\_ 20240113  
Time 21.10  
INSTRUM spect  
PROBHD 5 mm FABS0 BB/  
PULPROG zgpg30  
TD 32768  
SOLVENT CDCl3  
NS 2028  
DS 2  
SWH 24038.461 Hz  
FIDRES 0.733594 Hz  
AQ 0.6815744 sec  
RG 186.42  
DW 20.800 usec  
DE 6.50 usec  
TE 292.3 K  
OL 2.0000000 sec  
DLI 0.03000000 sec  
TD0 1

----- CHANNEL f1 -----  
SF01 100.6279588 MHz  
NUC1 13C  
P1 8.30 usec  
PLW1 54.0000000 W

----- CHANNEL f2 -----  
SF02 400.1316008 MHz  
NUC2 1H  
CFDPRG12 waltz16  
PCPD0 30.00 usec  
PLA2 12.0000000 W  
PLW2 0.32231000 W  
PLW3 0.16212000 W

F2 - Processing parameters  
SI 16384  
SF 100.6177945 MHz  
WDW EM  
SSB 0  
LB 1.00 Hz  
GB 0  
PC 1.40

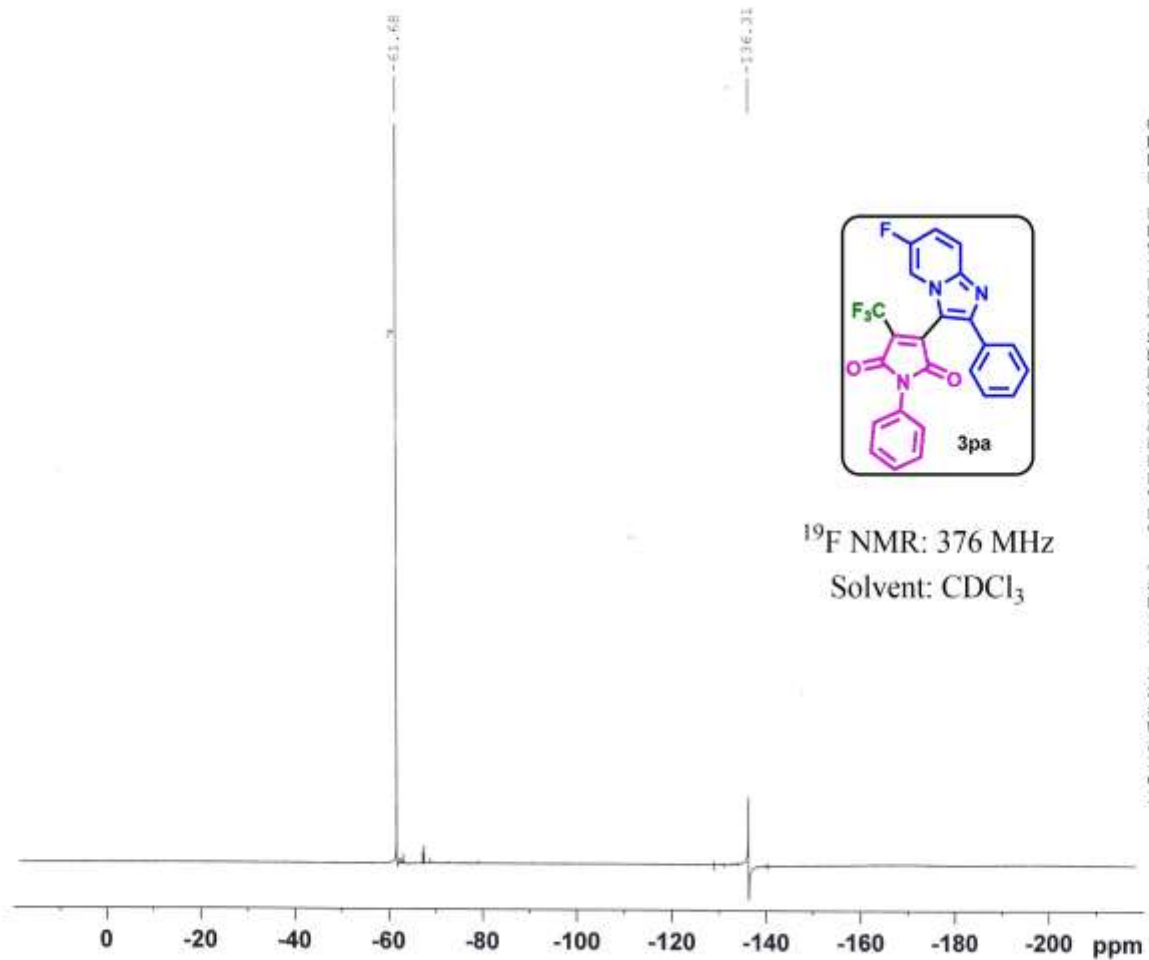

Current Data Parameters  
 NAME Dr. A HAJRA 2024 1H  
 EXPNO 14  
 PROCNO 1

F2 - Acquisition Parameters  
 Date 20240103  
 Time 17.33  
 INSTRUM spect  
 PROBHD 5 mm PABBO BB/  
 PULPROG zgpg30  
 TD 32768  
 SOLVENT CDCl3  
 NS 8  
 DS 2  
 SWH 89285.711 Hz  
 FIDRES 2.724784 Hz  
 AQ 0.1835008 sec  
 RG 186.42  
 DW 5.600 usec  
 DE 6.50 usec  
 TE 290.0 K  
 D1 1.00000000 sec  
 TD0 1

----- CHANNEL f1 -----  
 SFO1 376.4795333 MHz  
 NUCL 19F  
 P1 12.50 usec  
 PLW1 20.00000000 W

F2 - Processing parameters  
 SI 16384  
 SF 376.5171850 MHz  
 WDW EM  
 SSB 0  
 LB 0.30 Hz  
 GB 0  
 PC 1.00

7.946  
7.928  
7.672  
7.668  
7.651  
7.480  
7.476  
7.471  
7.459  
7.440  
7.432  
7.426  
7.417  
7.411  
7.271  
7.259  
7.250  
7.222  
7.211  
7.206  
7.190  
6.913  
6.896  
6.879

— 2.716  
— 2.376

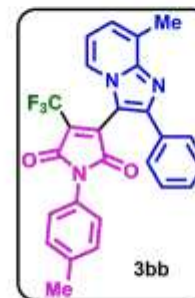

<sup>1</sup>H NMR: 400 MHz  
Solvent: CDCl<sub>3</sub>

Current Data Parameters  
NAME Dr. A HAJRA 2022 1H  
EXPNO 229  
PROCNO 1

F2 - Acquisition Parameters  
Date\_ 20220306  
Time\_ 16.33  
INSTRUM spect  
PROBHD 5 mm PABBO BB/  
PULPROG zg30  
TD 32768  
SOLVENT CDCl3  
NS 8  
DS 2  
SWH 8223.685 Hz  
FIDRES 0.250967 Hz  
AQ 1.9922844 sec  
RG 77.59  
DW 60.000 usec  
DE 6.50 usec  
TE 293.5 K  
D1 1.00000000 sec  
TD0 1

----- CHANNEL f1 -----  
SFO1 400.1524711 MHz  
NUC1 1H  
P1 14.75 usec  
PLW1 12.00000000 W

F2 - Processing parameters  
SI 16384  
SF 400.1500087 MHz  
WDW EM  
SSB 0  
LB 0.30 Hz  
GB 0  
PC 1.00

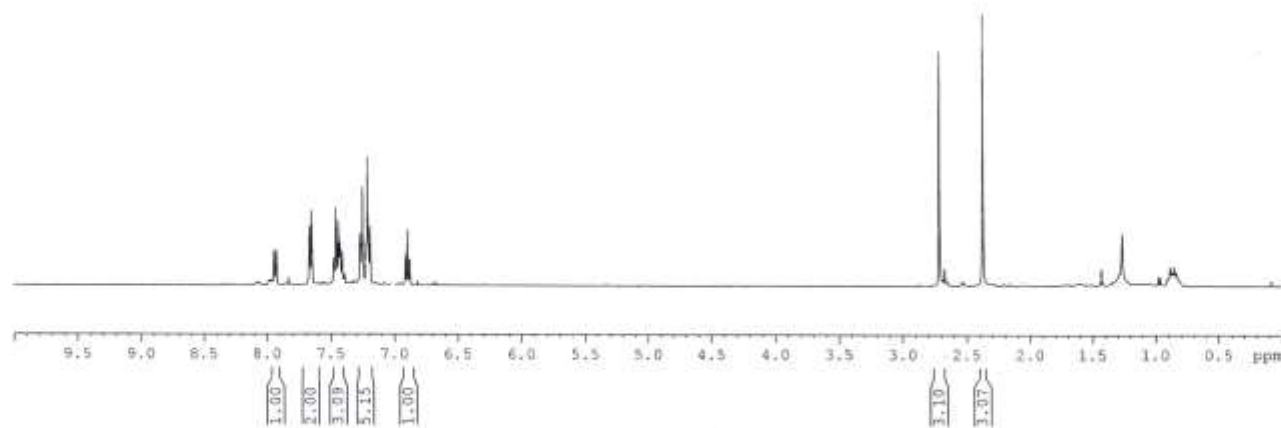

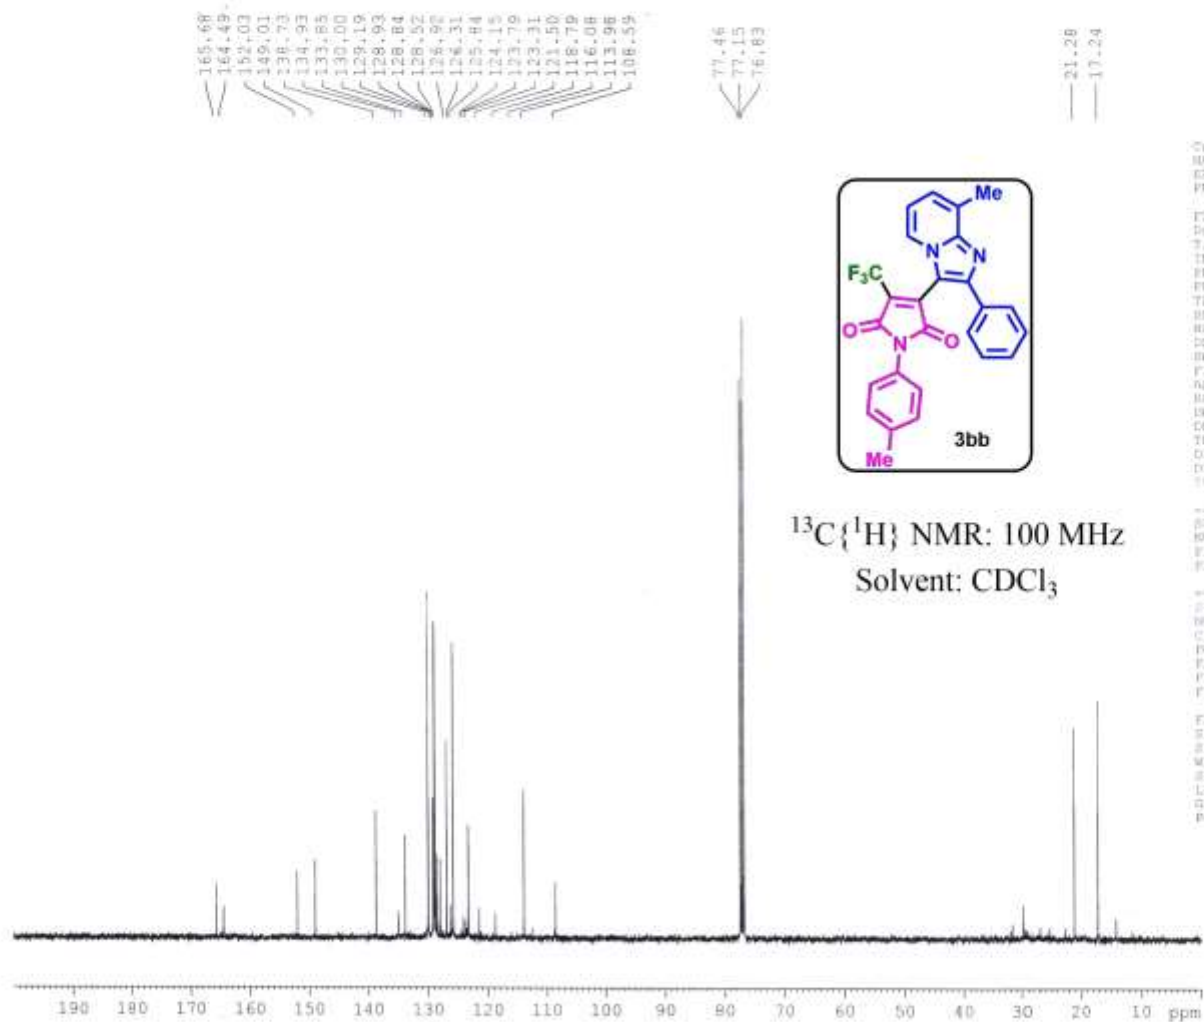

Current Data Parameters  
 NAME Dr. A HAJRA-2022-13C  
 EXPRD 100  
 PROCNO 3

FT - Acquisition Parameters

Date\_ 10/20/2023  
 TIME 11:12  
 INSTRM spect  
 PROBRD 3 via FAIMS SB7  
 PULPROG zgpg30  
 TD 32768  
 SOLVENT CDCl3  
 NS 640  
 DS 4  
 SWH 24098.461 Hz  
 FIDRES 0.733596 Hz  
 AQ 0.6813744 sec  
 RG 186.47  
 LW 20.900 usec  
 CE 6.50 usec  
 TE 294.0 K  
 D1 2.0000000 sec  
 D11 0.0000000 sec  
 TSC 1

----- CHANNEL f1 -----  
 FOC1 100.6274566 MHz  
 NUC1 13C  
 P1 6.90 usec  
 PLW1 54.0000000 W

----- CHANNEL f2 -----  
 FOC2 400.1114004 MHz  
 NUC2 1H  
 CPDPRG2 waltz16  
 PCPD2 50.00 usec  
 PLW2 12.0000000 W  
 PTW12 0.32221000 W  
 PTW13 0.14212000 W

FT - Processing parameters  
 SI 16384  
 SF 100.6277951 MHz  
 WDW EM  
 SSB 0  
 LB 1.00 Hz  
 GB 0  
 PC 1.40

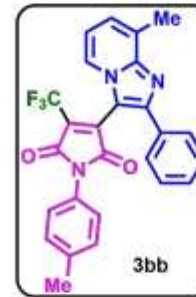

<sup>19</sup>F NMR: 376 MHz  
Solvent: CDCl<sub>3</sub>

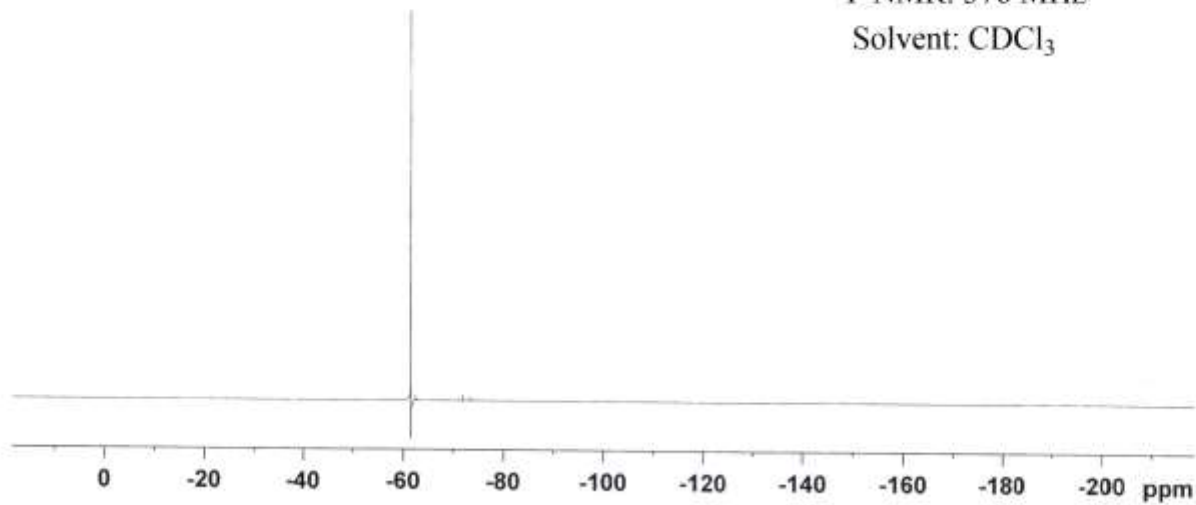

Current Data Parameters  
NAME Dr. A HAJRA 2022\_1  
EXPNO 230  
PROCNO 1

F2 - Acquisition Parameters  
Date 20220306  
Time 16.38  
INSTRUM spect  
PROBHD 5 mm PABBO BB/  
PULPROG zgpg30  
TD 32768  
SOLVENT CDCl3  
NS 4  
DS 2  
SWH 89285.711 Hz  
FIDRES 2.724784 Hz  
AQ 0.1835008 sec  
RG 77.59  
LW 5.600 use  
DE 6.50 use  
TE 293.5 K  
D1 1.00000000 sec  
TDO 1

----- CHANNEL f1 -----  
SFO1 376.4795333 MHz  
NUC1 19F  
P1 12.50 use  
PLW1 20.00000000 W

F2 - Processing parameters  
SI 16384  
SF 376.5171850 MHz  
WDW EM  
SSB 0  
LB 0.30 Hz  
GB 0  
PC 1.00

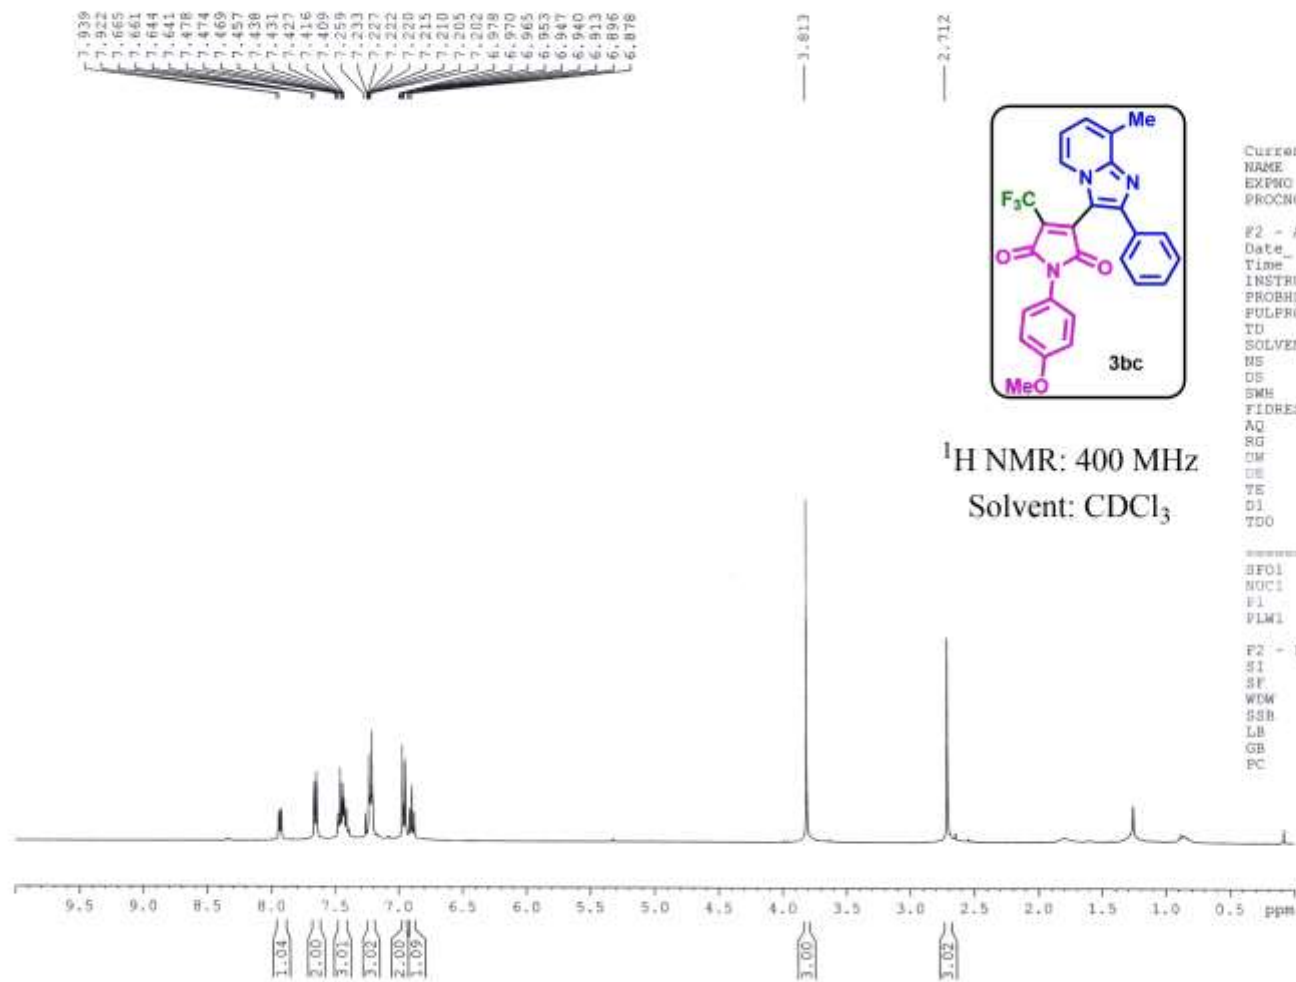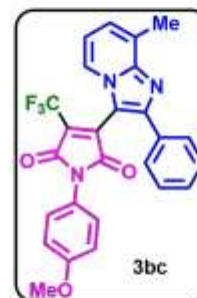

<sup>1</sup>H NMR: 400 MHz  
Solvent: CDCl<sub>3</sub>

Current Data Parameters  
NAME Dr. A MAJRA 2022 1H  
EXPRO 251  
PROCNO 1

F2 - Acquisition Parameters  
Date\_ 20220313  
Time 9.07  
INSTRUM spect  
PROBHD 5 mm PABBO BB/  
PULPROG zg30  
TD 32768  
SOLVENT CDCl3  
NS 6  
DS 2  
SWH 8223.685 Hz  
FIDRES 0.250967 Hz  
AQ 1.9922944 sec  
RG 67.81  
DM 60.800 usec  
DE 6.50 usec  
TE 291.4 K  
D1 1.00000000 sec  
TDO 1

===== CHANNEL f1 =====  
RF01 400.1524711 MHz  
NUC1 1H  
P1 14.75 usec  
PLW1 12.00000000 W

F2 - Processing parameters  
SI 16384  
SF 400.1500092 MHz  
WDM EM  
SSB 0  
LB 0.30 Hz  
GB 0  
PC 1.00

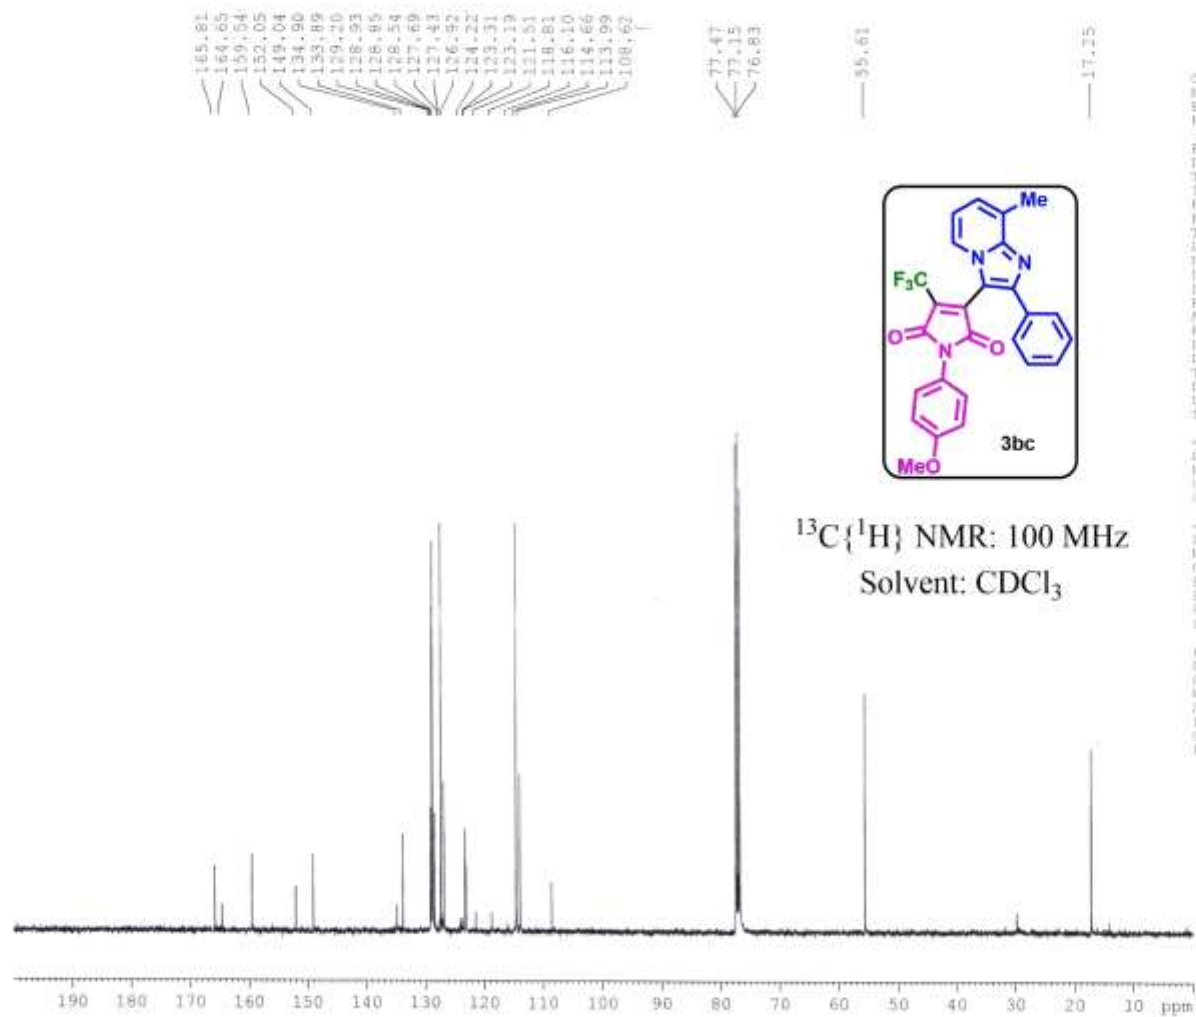

165.81  
164.66  
159.04  
152.05  
149.04  
134.90  
133.89  
129.20  
126.93  
126.95  
126.54  
127.69  
127.41  
126.92  
124.22  
123.31  
123.19  
121.51  
118.81  
116.10  
114.66  
113.99  
108.62

77.47  
77.15  
76.83

55.61

17.25

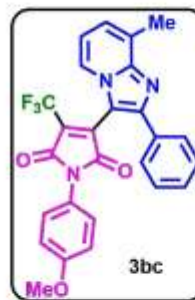

Current Data Parameters  
NAME: Dr. A NAHA-2002-13C  
EXPNO: 104  
PROCNO: 1

PC - Acquisition Parameters  
Date\_: 20230111  
Time: 9.33  
INSTRUM: spect  
PROBHD: 5 mm HBBBO BB7  
PULPROG: zgpg30  
TD: 32768  
SOLVENT: CDCl3  
NS: 1004  
DS: 2  
SWH: 24039.461 Hz  
FIDRES: 0.713394 Hz  
AQ: 0.6815744 sec  
RG: 186.42  
DW: 20.900 usec  
DE: 4.50 usec  
TE: 283.2 K  
D1: 1.00000000 sec  
D11: 0.03000000 sec  
TD0: 1

----- CHANNEL f1 -----  
SFO1: 100.6219588 MHz  
NUC1: 13C  
P1: 8.90 usec  
PLW1: 04.00000000 W

----- CHANNEL f2 -----  
SFO2: 400.1316028 MHz  
NUC2: 1H  
CPOPRG12: waltz16  
PCPD0: 90.00 usec  
EPR2: 12.00000000 W  
PLW2: 0.32000000 W  
PLW12: 0.14000000 W

PC - Processing parameters  
SI: 32768  
SF: 100.6217688 MHz  
WDW: EM  
SSB: 0  
LB: 1.00 Hz  
GB: 0  
PC: 1.40



---61.45

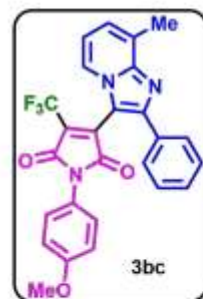

$^{19}\text{F}$  NMR: 376 MHz  
Solvent:  $\text{CDCl}_3$

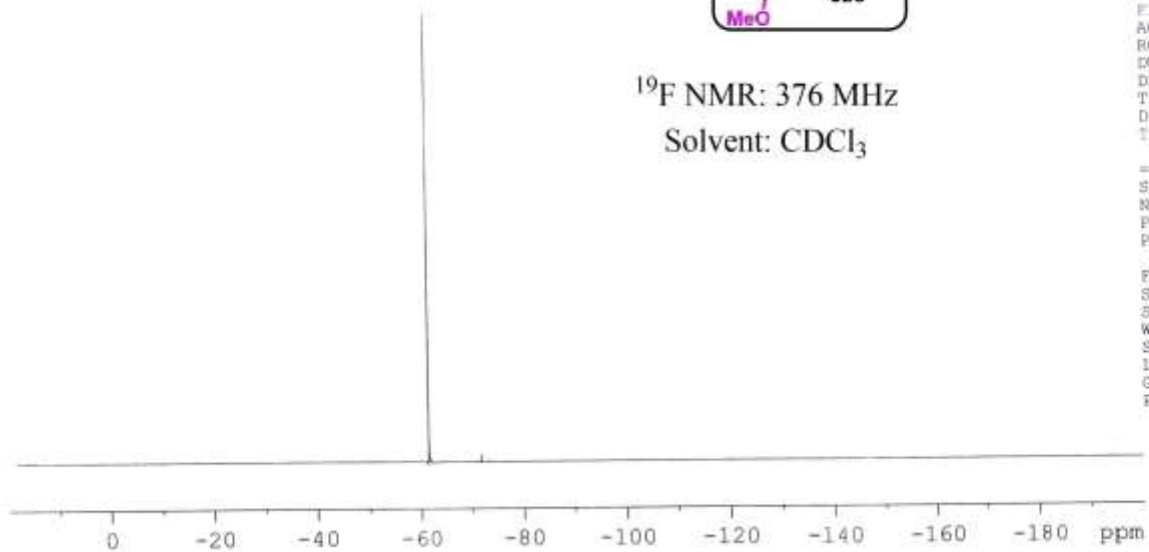

Current Data Parameters  
NAME Dr. A HAJRA 2022 1H  
EXPNO 252  
PROCNO 1

F2 - Acquisition Parameters  
Date\_ 20220313  
Time\_ 9.09  
INSTRUM spect  
PROBHD 5 mm PABBO BB/  
PULPROG zgpg30  
TD 32768  
SOLVENT  $\text{CDCl}_3$   
NS 4  
DS 2  
SWH 89285.711 Hz  
FIDRES 2.724784 Hz  
AQ 0.1835008 sec  
RG 186.42  
RW 5.600 usec  
DE 6.50 usec  
TE 291.5 K  
D1 1.00000000 sec  
TD0 1

===== CHANNEL f1 =====  
SFO1 376.4795333 MHz  
NUC1  $^{19}\text{F}$   
P1 12.50 usec  
PLW1 20.00000000 W

F2 - Processing parameters  
SI 16384  
SF 376.5171850 MHz  
WDCW EM  
SSB 0  
LB 0.30 Hz  
GB 0  
PC 1.00

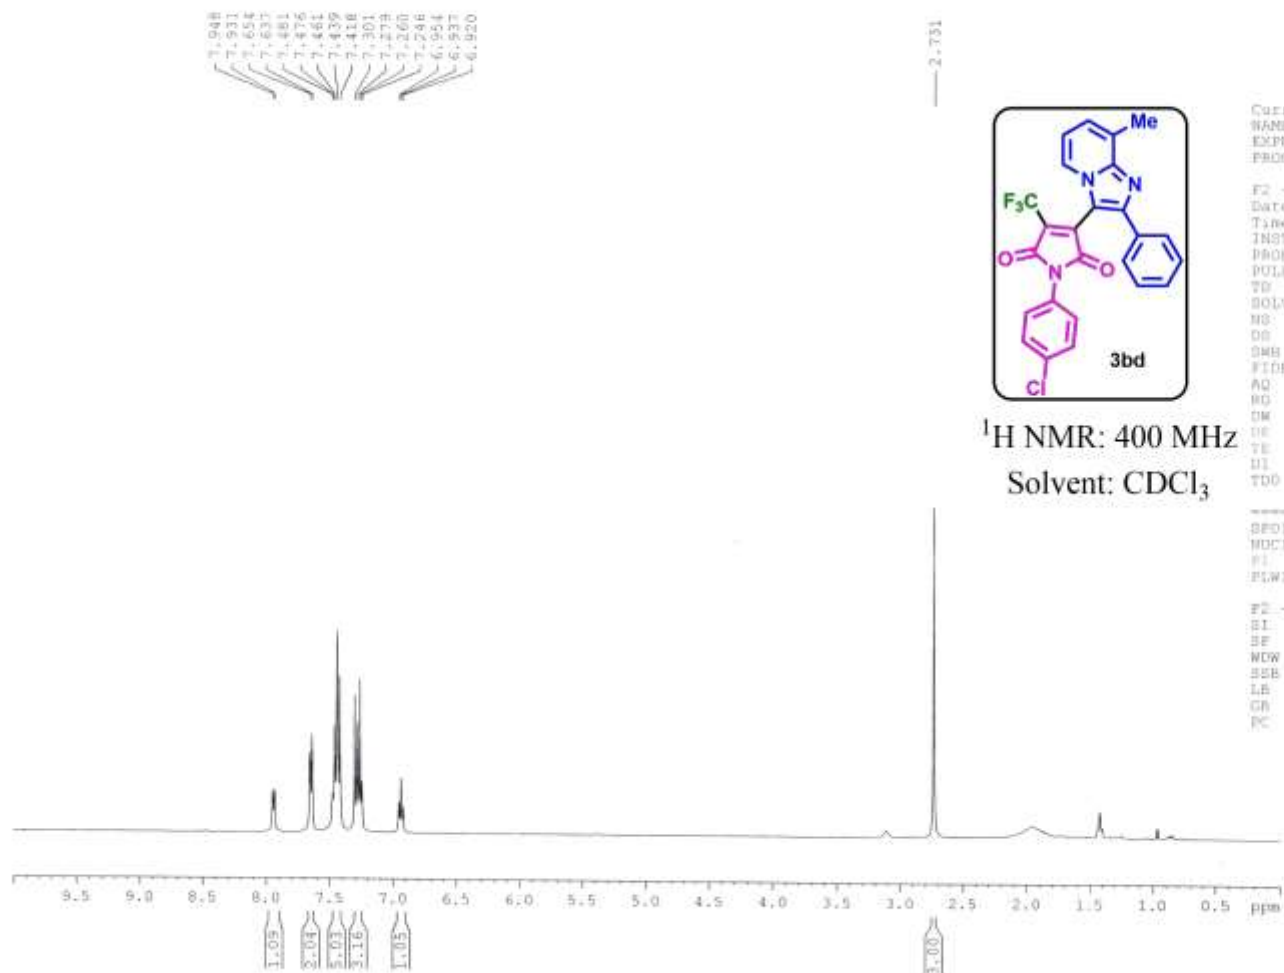

Current Data Parameters  
NAME Dr. A RAJBA 2022-18-  
EXPNO 357  
PROCNO 1

F2 - Acquisition Parameters  
Date\_ 20220403  
Time 8.52  
INSTRUM spect  
PROBHD 5 mm PABBO BB/  
PULPROG zg30  
TD 32768  
SOLVENT CDCl3  
NS 8  
DS 2  
SWH 8223.685 Hz  
FIDRES 0.250967 Hz  
AQ 1.9922944 sec  
RG 120.16  
CW 60.800 usec  
DE 6.50 usec  
TE 294.6 K  
U1 1.00000000 sec  
TD0 1

CHANNEL f1  
SFO1 400.1524711 MHz  
NUC1 1H  
P1 14.75 usec  
PLW1 12.00000000 W

F2 - Processing parameters  
SI 16384  
SF 400.1500090 MHz  
WDW EM  
SFB 0  
LB 0.30 Hz  
GB 0  
PC 1.00

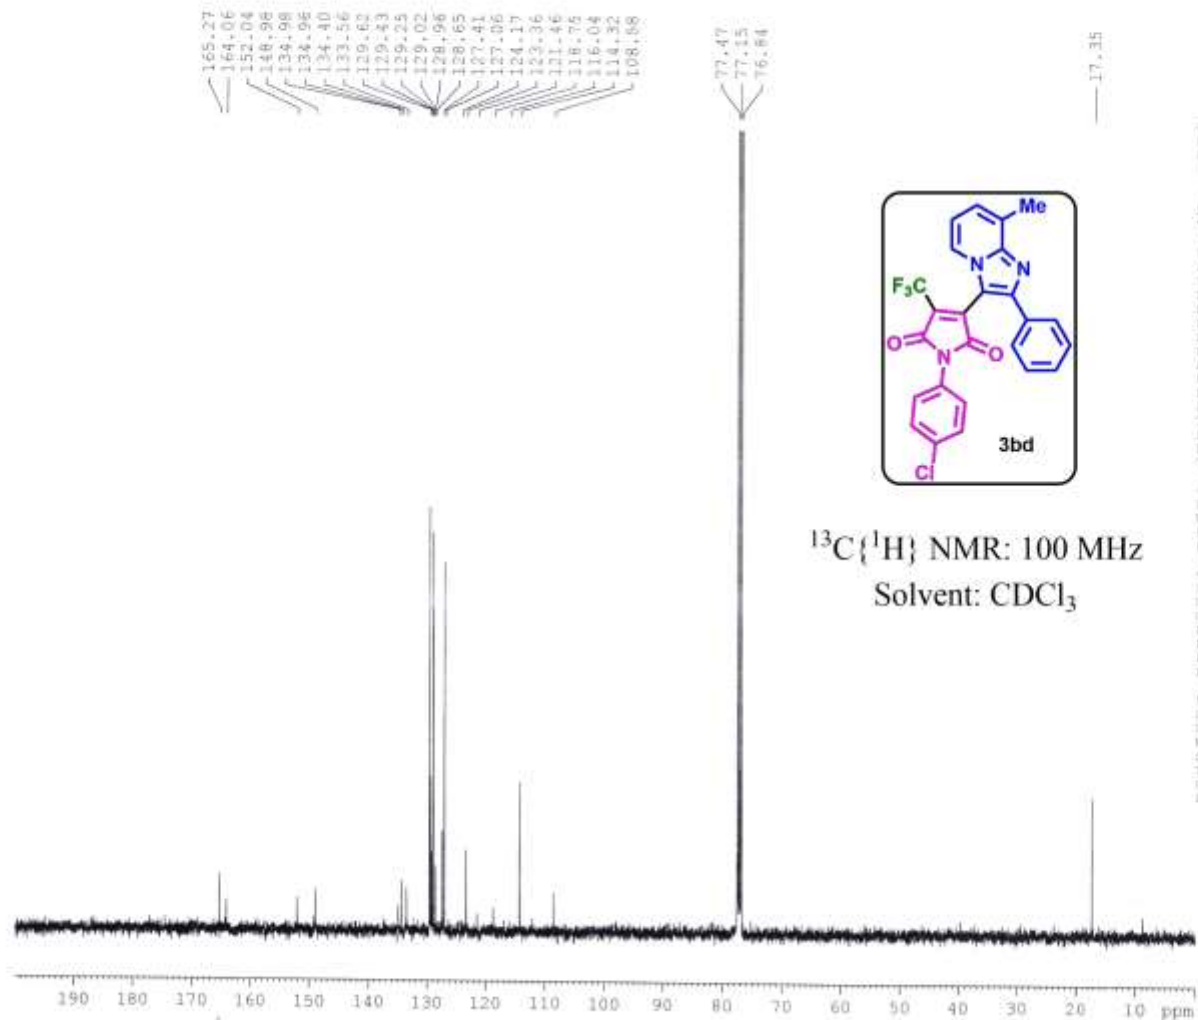

Current Data Parameters  
NAME: Dr. A. MAJKA-2022-13C  
EXNO: 149  
PROCNO: 1

F2 - Acquisition Parameters  
Date\_: 20220406  
Time: 18.30  
INSTRUM: spect  
PROBHD: 5 mm QNP001  
PULPROG: zgpg30  
TD: 65536  
SOLVENT: CDCl3  
NS: 1024  
DS: 2  
SWH: 24029.481 Hz  
FIDRES: 0.732596 Hz  
AQ: 0.6813744 sec  
RG: 184.42  
DB: 30.900 umm  
DE: 8.50 umm  
TE: 298.2 K  
SI: 2.00000000 sec  
SLL: 0.00000000 sec  
TSD: 1

----- CHANNEL f1 -----  
NUC1: 100.6278000 MHz  
NUC2: 13C  
P1: 8.00 umm  
PLW1: 04.00000000 W

----- CHANNEL f2 -----  
SPRO: 400.1418000 MHz  
NUC3: 1H  
NUC4: 1H  
P2: 90.00 umm  
PLW2: 12.00000000 W  
PLW3: 0.12131000 W  
PLW4: 0.12131000 W

F2 - Processing parameters  
SI: 14194  
SF: 100.6177845 MHz  
WDW: EM  
SSB: 0  
LB: 1.00 Hz  
GB: 0  
PC: 1.40

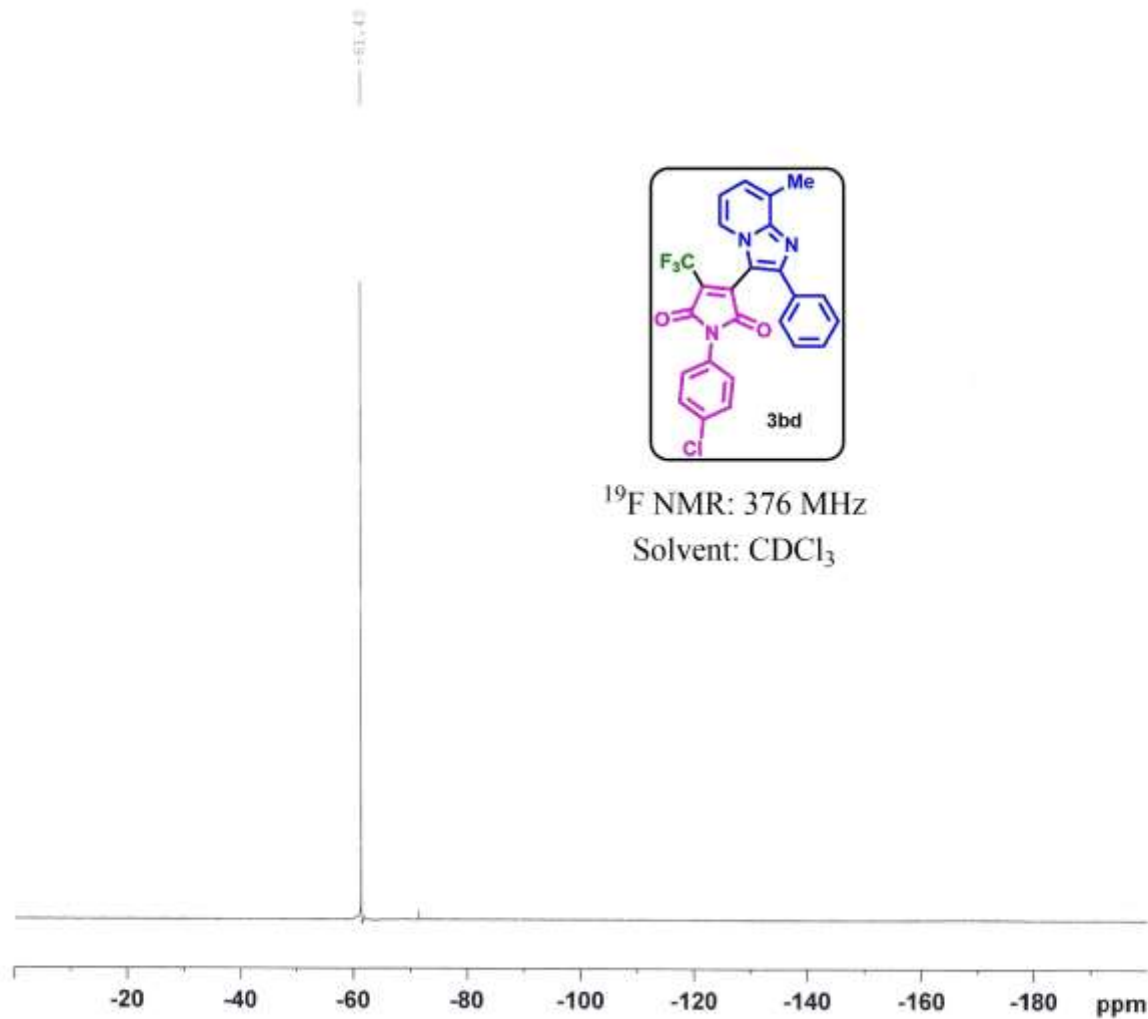

Current Data Parameters  
 NAME    Dr. A HAJRA 2022 1H  
 EXPNO    358  
 PROCNO    1

F2 - Acquisition Parameters  
 Date\_    20220403  
 Time\_    8.57  
 INSTRUM    spect  
 PROBHD    5 mm PABBO BB/  
 PULPROG    zgpg30  
 TD    32768  
 SOLVENT    CDCl3  
 NS    8  
 DS    2  
 SWH    89285.711 Hz  
 FIDRES    2.724784 Hz  
 AQ    0.1835008 sec  
 RG    120.16  
 DW    5.600 usec  
 DE    6.50 usec  
 TE    294.7 K  
 D1    1.00000000 sec  
 TD0    1

----- CHANNEL f1 -----  
 SFO1    376.4795333 MHz  
 NUC1    19F  
 P1    12.50 usec  
 PLW1    20.00000000 W

F2 - Processing parameters:  
 SI    16384  
 SF    376.5171850 MHz  
 WDW    EM  
 SSB    0  
 LB    0.30 Hz  
 GB    0  
 PC    1.00

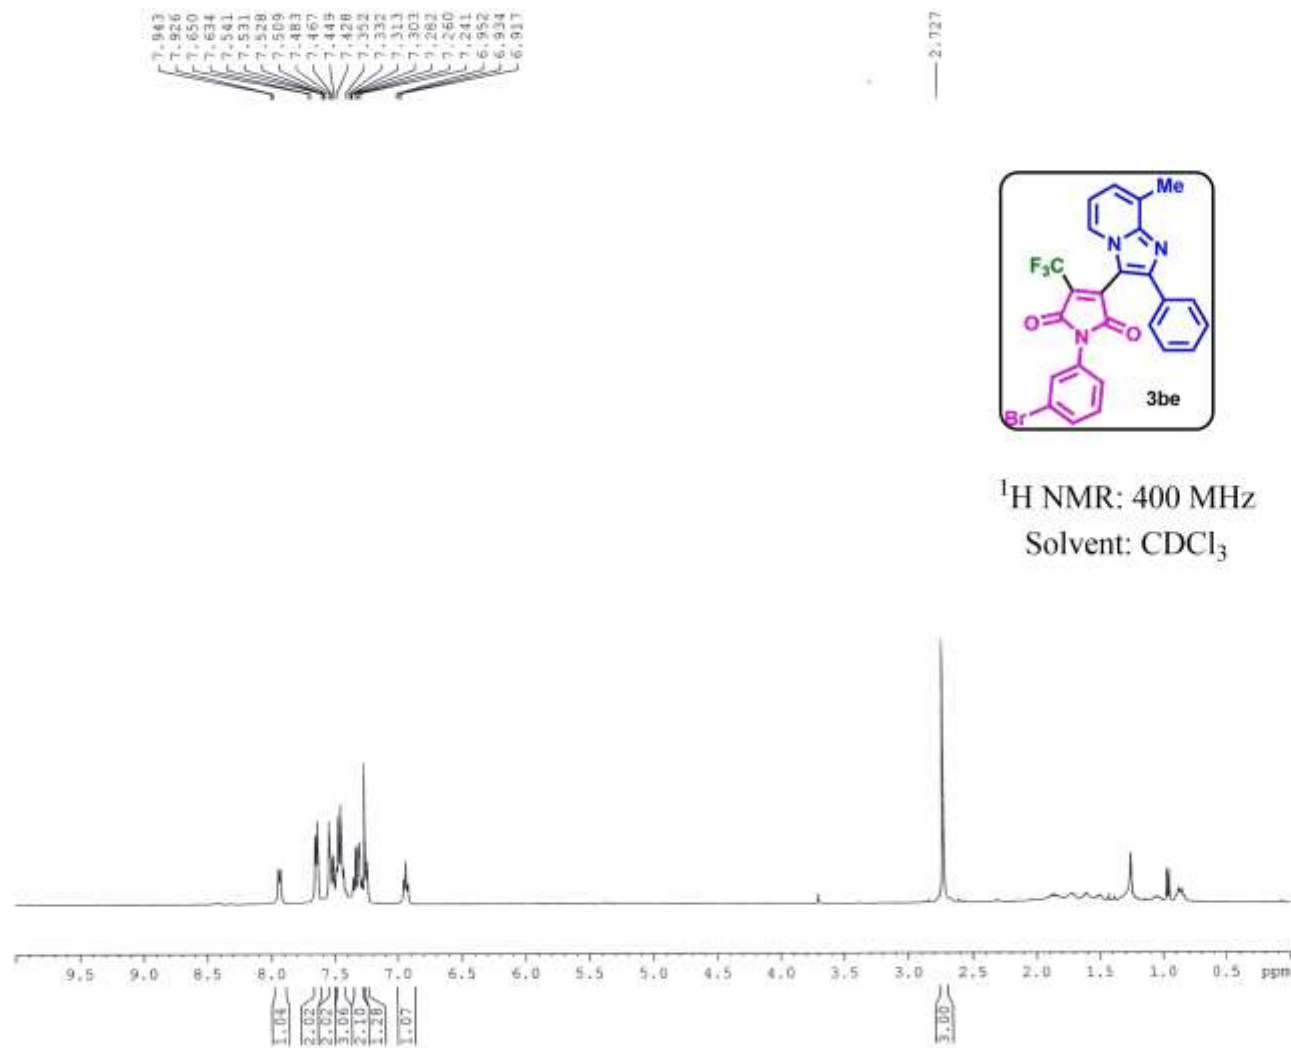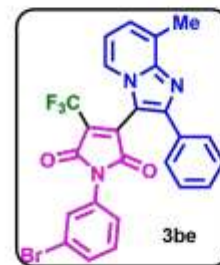

$^1\text{H NMR}$ : 400 MHz  
Solvent:  $\text{CDCl}_3$

Current Data Parameters  
NAME Dr. A HAJRA 2022 1R  
EXPNO 700  
PROCNO 1

F2 - Acquisition Parameters  
Date\_ 20220806  
Time 12.52  
INSTRUM spect  
PROBHD 5 mm PABBO BB/  
PULPROG zg30  
TD 32768  
SOLVENT CDCl3  
NS 8  
DS 2  
SWH 8223.685 Hz  
FIDRES 0.250967 Hz  
AQ 1.9922944 sec  
RG 186.42  
DM 60.800 usec  
DE 6.50 usec  
TE 293.6 K  
D1 1.00000000 sec  
TDO 1

----- CHANNEL f1 -----  
SFO1 400.1524711 MHz  
NUC1 1H  
PI 14.75 usec  
PLW1 12.00000000 W

F2 - Processing parameters  
SI 16384  
SF 400.1500087 MHz  
WDW EM  
SSB 0  
LB 0.30 Hz  
GB 0  
PC 1.00

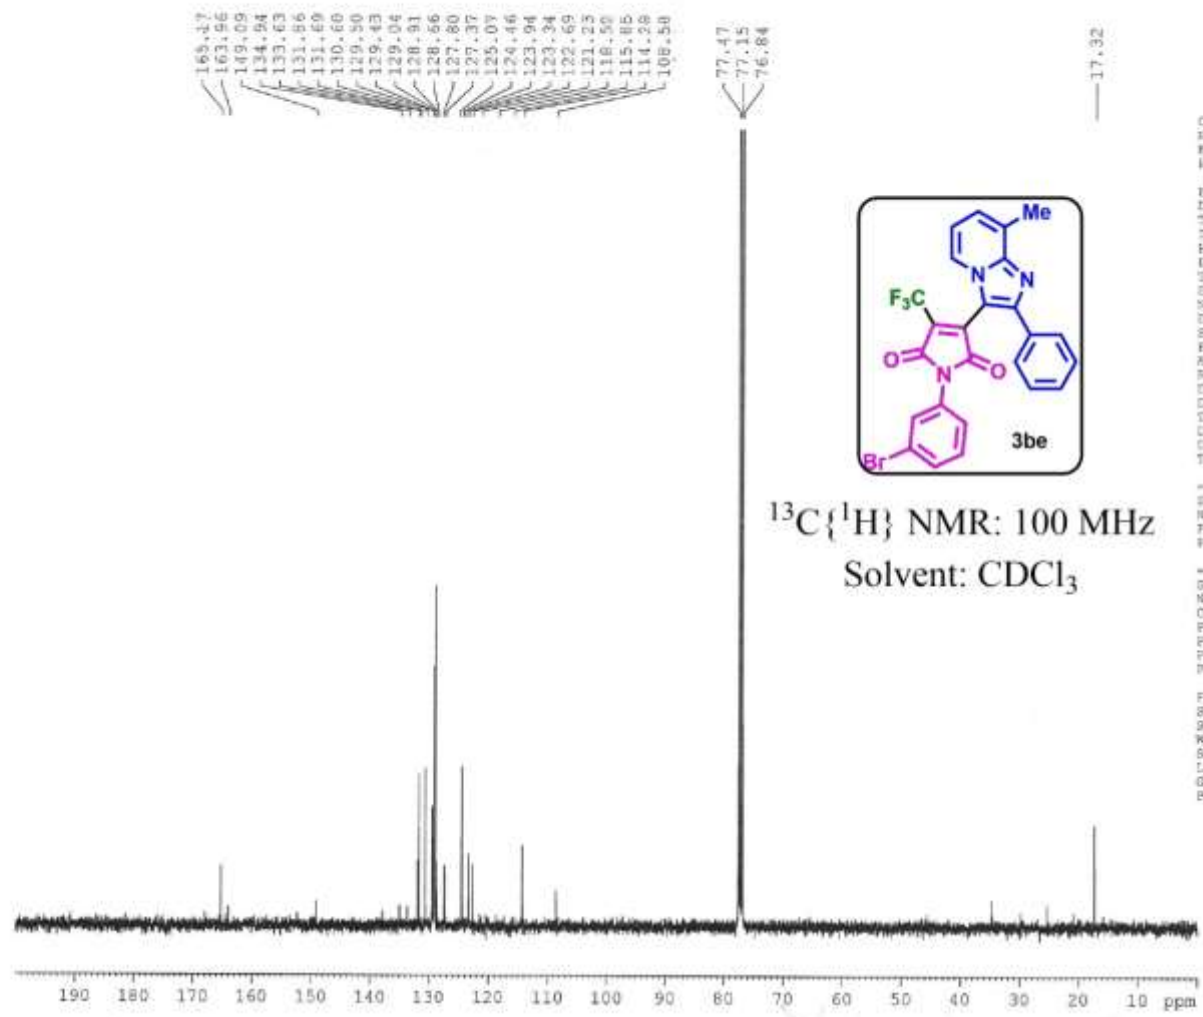

Current Data Parameters  
NAME Dr. A HANNA-2022-13C  
EXPNO 295  
PROCNO 1

F2 - Acquisition Parameters  
Date\_ 20220904  
Time 13.38  
INSTRUM spect  
PROBHD 5 mm WBBD BA/  
PULPROG zgpg30  
TD 32768  
SOLVENT CDCl3  
NS 750  
DS 2  
SWH 34038.441 Hz  
FIDRES 0.733596 Hz  
AQ 0.6915744 sec  
RG 186.42  
DM 20.600 usec  
DE 6.50 usec  
TE 298.4 K  
D1 2.0000000 sec  
D11 0.0300000 sec  
TD 1

----- CHANNEL f1 -----  
SFO1 100.6218089 MHz  
NUC1 13C  
P1 6.90 usec  
PSW1 54.0000000 W

----- CHANNEL f2 -----  
SFO2 400.1516006 MHz  
NUC2 1H  
CPOPRG12 waltz16  
PCPD2 96.00 usec  
PCPD2 12.0000000 W  
PSW12 0.32232000 W  
PSW13 0.18212000 W

F2 - Processing parameters  
SI 16384  
SF 100.6177859 MHz  
WDW EM  
SSB 0  
LB 1.00 Hz  
GB 0  
PC 1.40

---61.43

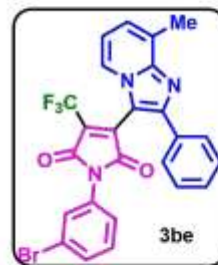

<sup>19</sup>F NMR: 376 MHz  
Solvent: CDCl<sub>3</sub>

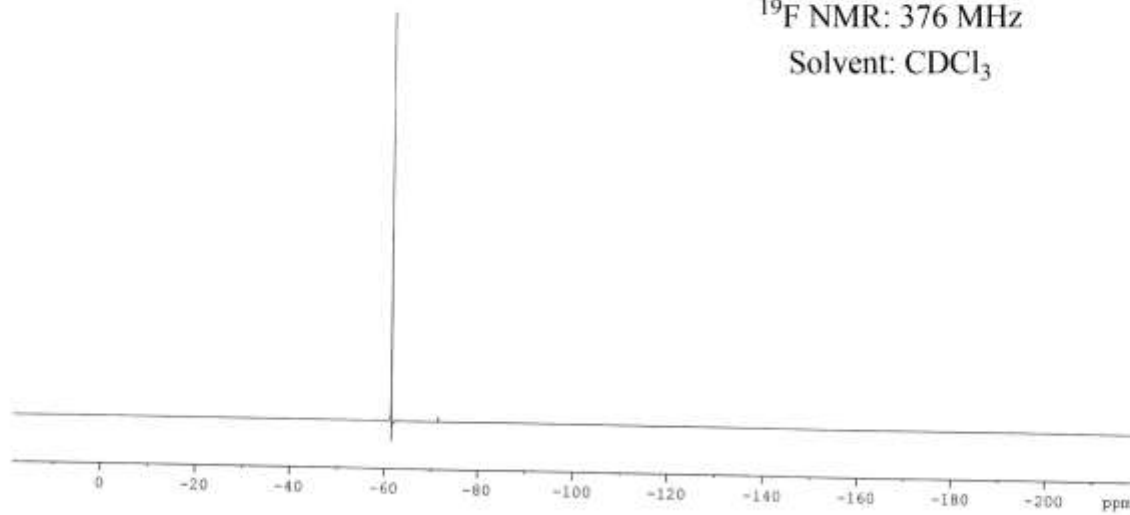

Current Data Parameters  
NAME Dr. A HAJRA 2022 1H  
EXPNO 701  
PROCNO 1

F2 - Acquisition Parameters  
Date\_ 20220806  
Time\_ 12.59  
INSTRUM spect  
PROBHD 5 mm PABBO BB/  
PULPROG zgpg30  
TD 32768  
SOLVENT CDCl3  
NS 8  
DS 2  
SWH 89285.711 Hz  
FIDRES 2.724784 Hz  
AQ 0.1835008 sec  
RG 186.42  
DW 5.600 usec  
DE 6.50 usec  
TE 293.6 K  
DI 1.00000000 sec  
TD0 1

----- CHANNEL f1 -----  
SFO1 376.4795333 MHz  
NUC1 19F  
P1 12.50 usec  
PLW1 20.00000000 W

F2 - Processing parameters-  
SI 16384  
SF 376.5171850 MHz  
WDW EM  
SSB 0  
LB 0.30 Hz  
GB 0  
PC 1.00

7.865  
7.848  
7.805  
7.801  
7.585  
7.562  
7.447  
7.441  
7.426  
7.407  
7.390  
7.259  
7.204  
7.187  
6.892  
6.875  
6.857

3.119  
2.700

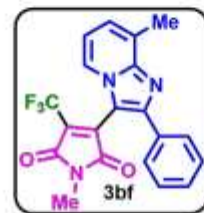

<sup>1</sup>H NMR: 400 MHz  
Solvent: CDCl<sub>3</sub>

Current Data Parameters  
NAME Dr. A RAJRA 2022 1h  
EXPNO 475  
PROCNO 1

F2 - Acquisition Parameters  
Date\_ 20220423  
Time 16.04  
INSTRUM spect  
PROBHD 5 mm PABBO BB/  
PULPROG zg30  
TD 32768  
SOLVENT CDCl<sub>3</sub>  
NS 8  
DS 2  
SWH 8223.685 Hz  
FIDRES 0.250967 Hz  
AQ 1.9922944 sec  
RG 168.31  
DM 60.800 usec  
DE 6.50 usec  
TE 297.3 K  
D1 1.0000000 sec  
TDO 1

----- CHANNEL f1 -----  
SFO1 400.1524711 MHz  
NUC1 1H  
P1 14.75 usec  
PL1 12.00000000 W

F2 - Processing parameters  
SI 16384  
SF 400.1500087 MHz  
WDW EM  
SSB 0  
LB 0.30 Hz  
GB 0  
PC 1.00

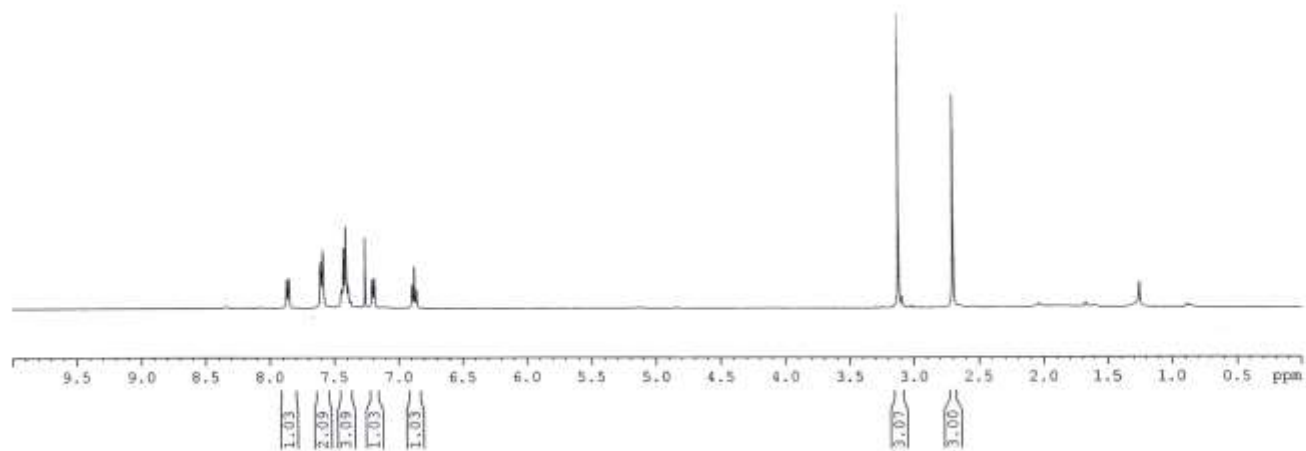



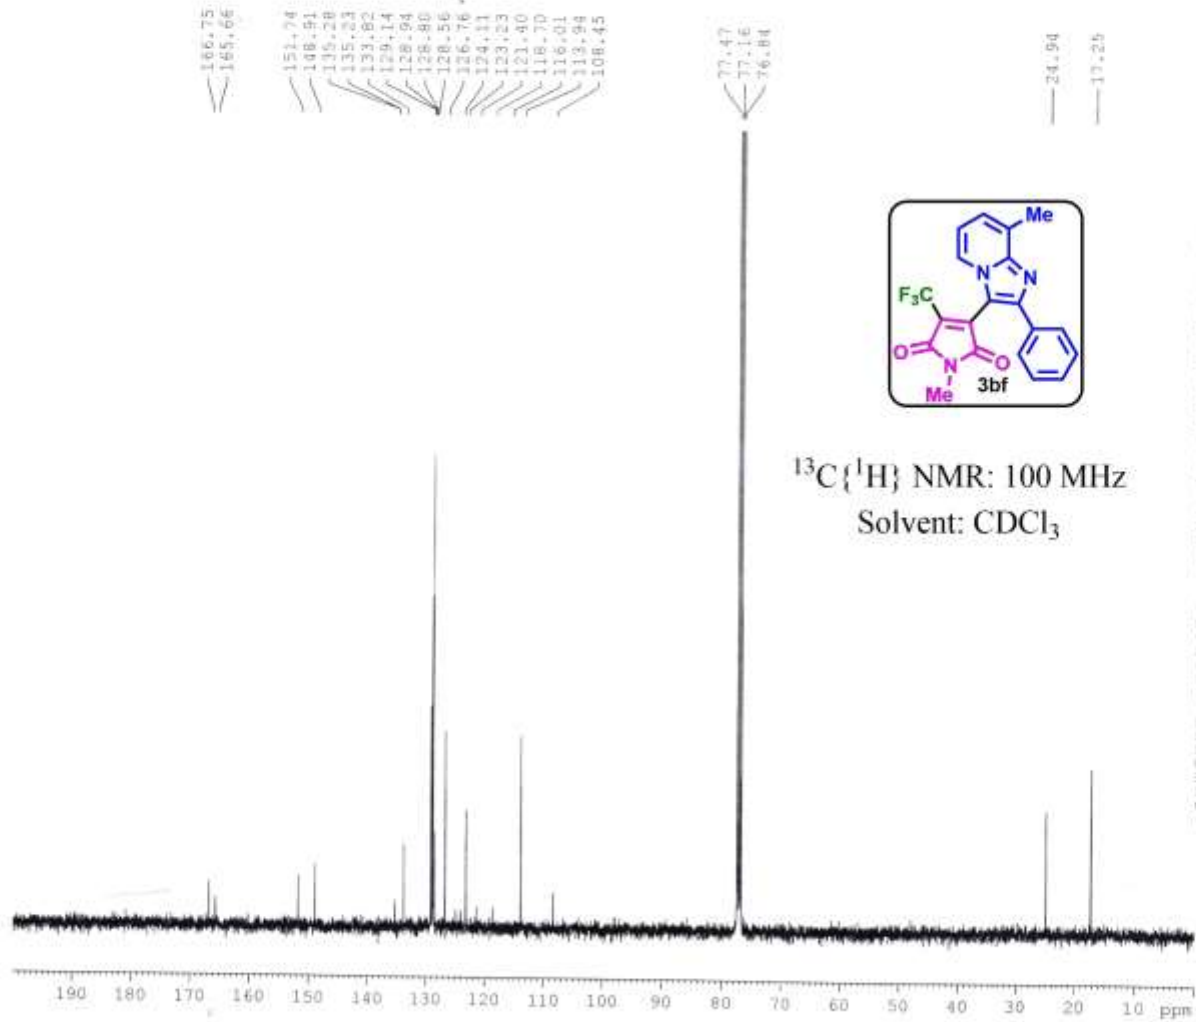

Current Data Parameters  
 NAME: Dr. A. MURRAY-2012-13C  
 EXPNO: 184  
 PROCNO: 1

F2 - Acquisition Parameters  
 Date\_: 20120423  
 Time: 15.50  
 INSTRUM: spect  
 PULPROG: zgpg30  
 TD: 32768  
 SOLVENT: ccdcl3  
 NS: 1024  
 DS: 2  
 SWH: 24504.441 Hz  
 FIDRES: 5.722094 Hz  
 AQ: 0.6615744 sec  
 RG: 389.33  
 DW: 20.800 usec  
 DE: 6.50 usec  
 TE: 297.2 K  
 D1: 0.0000000 sec  
 d11: 0.0000000 sec  
 TPD: 1

----- CHANNEL f1 -----  
 NUC1 100.6278564 MHz  
 NUCL1 13C  
 P1 9.90 usec  
 PL1 54.0000000 dB

----- CHANNEL f2 -----  
 NUC2 100.6278564 MHz  
 NUCL2 1H  
 CPOBPRG2 waltz16  
 P2P2 90.00 usec  
 PL2 12.0000000 dB  
 PL12 0.32231000 dB  
 PL13 0.16213000 dB

F2 - Processing parameters  
 SI 16384  
 SF 100.6177413 MHz  
 MDW DM  
 SSB 0  
 LB 1.00 Hz  
 GB 0  
 PC 1.40

—61.77

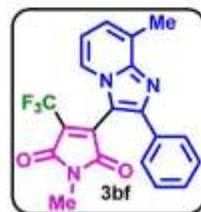

$^{19}\text{F}$  NMR: 376 MHz  
Solvent:  $\text{CDCl}_3$

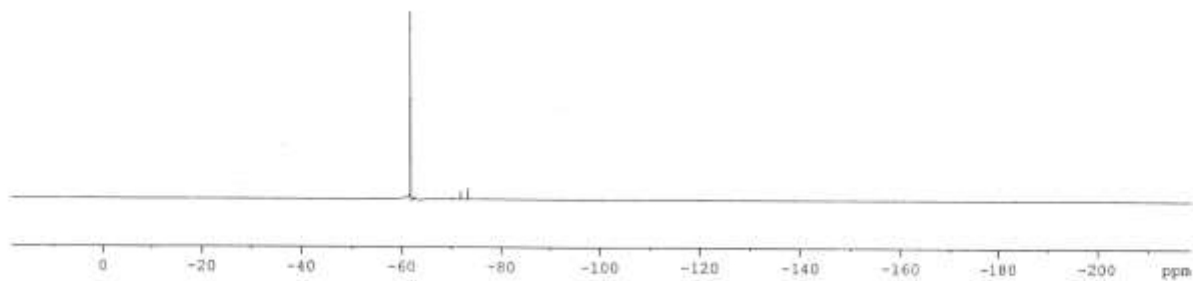

Current Date Parameters  
NAME Dr. A HAJRA 2022-1H  
EXPNO 476  
PROCNO 1

F2 - Acquisition Parameters  
Date\_ 20220423  
Time 16.08  
INSTRUM spect  
PROBHD 5 mm PABBO BB/  
PULPROG zgpg30  
TD 32768  
SOLVENT  $\text{CDCl}_3$   
NS 8  
DS 2  
SWH 89285.711 Hz  
FIDRES 2.724784 Hz  
AQ 0.1835008 sec  
RG 186.42  
OW 5.000 usec  
DE 6.50 usec  
TE 297.2 K  
D1 1.0000000 sec  
TDO 1

===== CHANNEL f1 =====  
SFO1 376.4795333 MHz  
NUC1 19F  
P1 12.50 usec  
PLM1 20.00000000 W

F2 - Processing parameters  
SI 16384  
SF 376.5171850 MHz  
WDW EM  
SSB 0  
LB 0.30 Hz  
GB 0  
PC 1.00

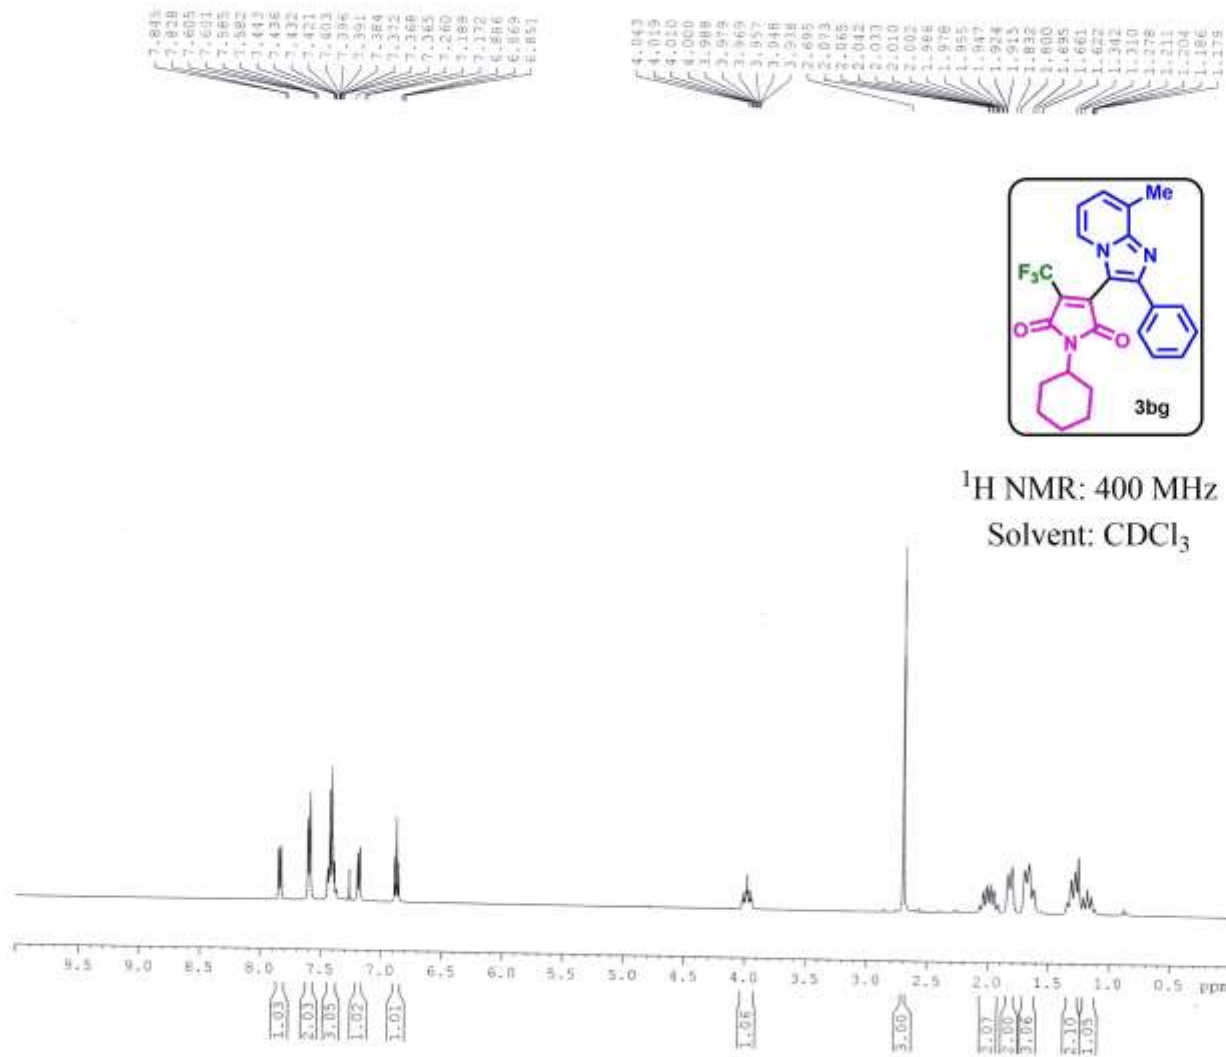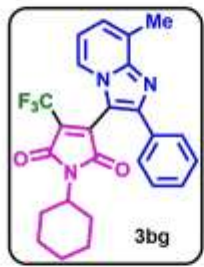

<sup>1</sup>H NMR: 400 MHz  
Solvent: CDCl<sub>3</sub>

Current Data Parameters  
 NAME Dr. A HAJRA 2022-18  
 EXPNO 1134  
 PROCNO 1

F2 - Acquisition Parameters  
 Date\_ 20221218  
 Time 19.36  
 INSTRUM spect  
 PROBHD 5 mm PABBO BB/  
 PULPROG zg30  
 TD 32768  
 SOLVENT CDCl3  
 NS 8  
 DS 2  
 SWH 8223.685 Hz  
 FIDRES 0.250967 Hz  
 AQ 1.9922944 sec  
 RG 47.25  
 DW 60.800 usec  
 DE 6.50 usec  
 TE 291.7 K  
 D1 1.00000000 sec  
 TDD 1

----- CHANNEL f1 -----  
 SF01 400.1524711 MHz  
 NUC1 1H  
 P1 14.75 usec  
 PLW1 12.00000000 W

F2 - Processing parameters  
 SI 16384  
 SF 400.1500095 MHz  
 WDW EM  
 SSB 0  
 LB 0.30 Hz  
 GB 0  
 PC 1.00

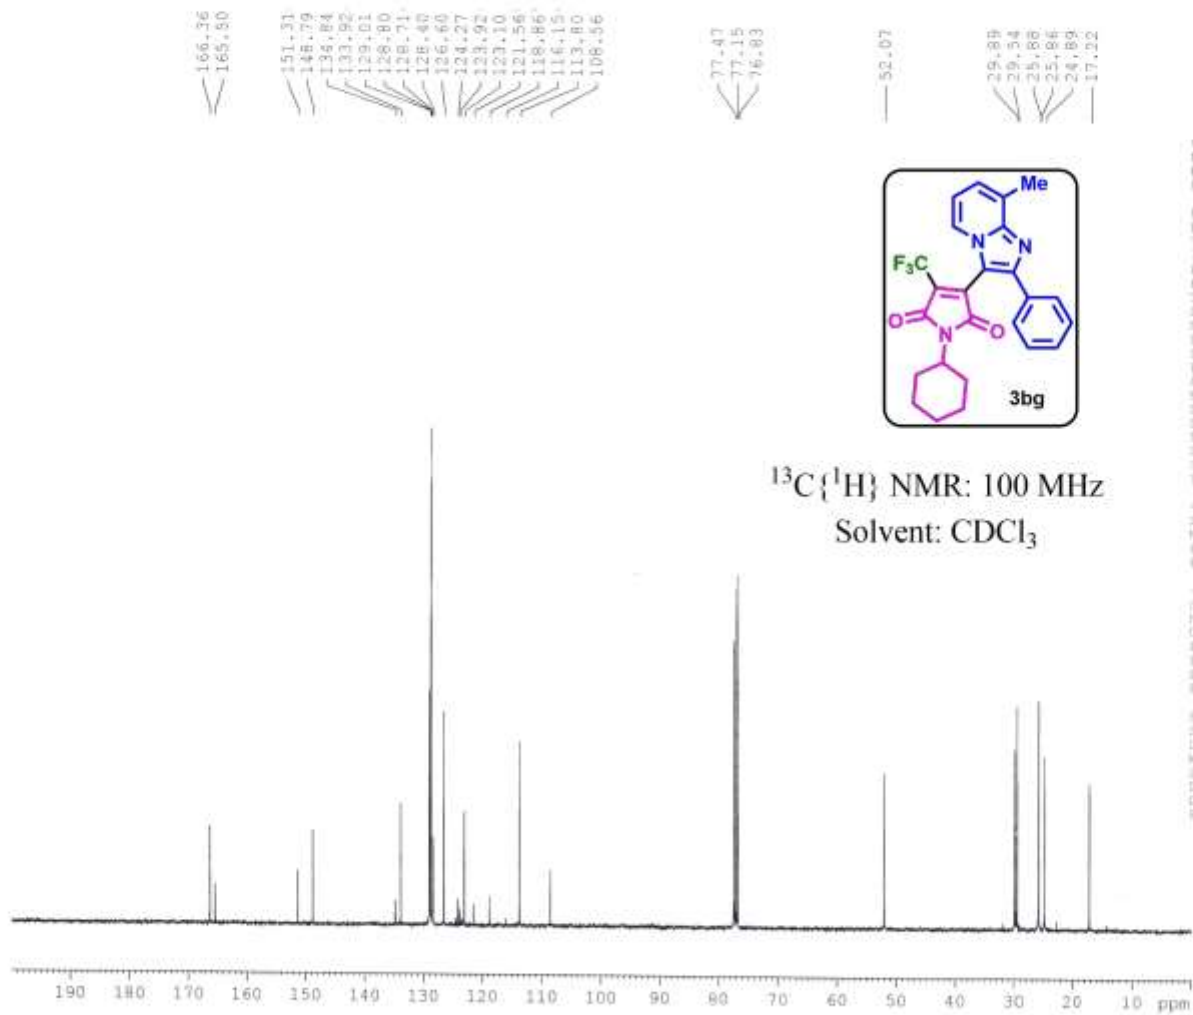

Current Data Parameters  
 NAME: Dr. A. HAJRA-2022-13C  
 EXPR0: 453  
 PROC00: 1

F2 - Acquisition Parameters  
 Date\_: 20221119  
 Time: 10:11  
 INSTRUM: spect  
 PROBHD: 5 mm TMRB BBO  
 PULPROG: zgpg30  
 TD: 25768  
 SOLVENT: CDCl3  
 NS: 440  
 DS: 2  
 SWH: 24029.441 MHz  
 FIDRES: 0.722096 Hz  
 AQ: 0.4815744 sec  
 RG: 398.42  
 SW: 20.000 uspc  
 DE: 6.50 uspc  
 TE: 293.2 K  
 D1: 2.00000000 sec  
 D11: 0.03000000 sec  
 Tot: 1

----- CHANNEL f1 -----  
 F101: 100.617668 MHz  
 F012: 13C  
 F1: 8.90 uspc  
 FWH1: 54.00000000 W

----- CHANNEL f2 -----  
 F202: 400.1514000 MHz  
 F022: 1H  
 CPDPRG2: waltz16  
 F0202: 90.00 uspc  
 FWH2: 22.00000000 W  
 FWH12: 0.32210000 W  
 FWH13: 0.18212000 W

F2 - Processing parameters  
 SI: 18184  
 SF: 100.6177916 MHz  
 NCU: 819  
 SSB: 0  
 LB: 1.00 Hz  
 GB: 0  
 PC: 1.40

88-19-

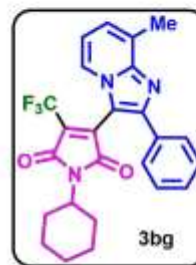

$^{19}\text{F}$  NMR: 376 MHz  
Solvent:  $\text{CDCl}_3$

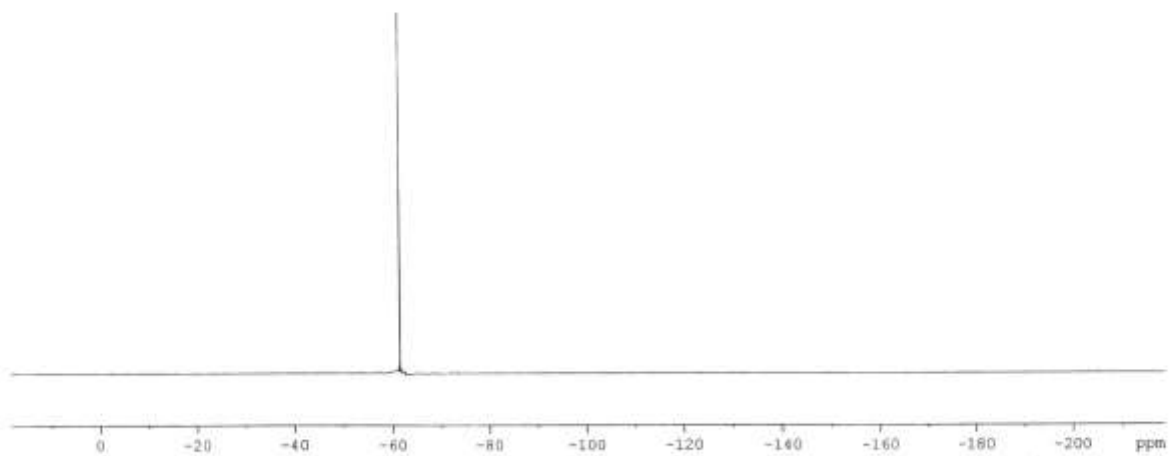

Current Data Parameters  
NAME Dr. A HAJRA 2022 1H  
EXPNO 809  
PROCNO 1

F2 - Acquisition Parameters  
Date\_ 20220917  
Time 20.14  
INSTRUM spect  
PROBHD 5 mm PABBO BB/  
PULPROG zgpg30  
TD 32768  
SOLVENT CDCl3  
NS 8  
DS 2  
SWH 89285.711 Hz  
FIDRES 2.724784 Hz  
AQ 0.1835008 sec  
RG 62.69  
DW 5.600 usec  
DE 6.90 usec  
TE 295.5 K  
D1 1.00000000 sec  
TDO 1

----- CHANNEL f1 -----  
SF01 376.4795333 MHz  
NUC1 19F  
P1 12.50 usec  
PLW1 20.00000000 W

F2 - Processing parameters  
SI 16384  
SF 376.5171850 MHz  
WDW EM  
SSB 0  
LB 0.30 Hz  
GB 0  
PC 1.00

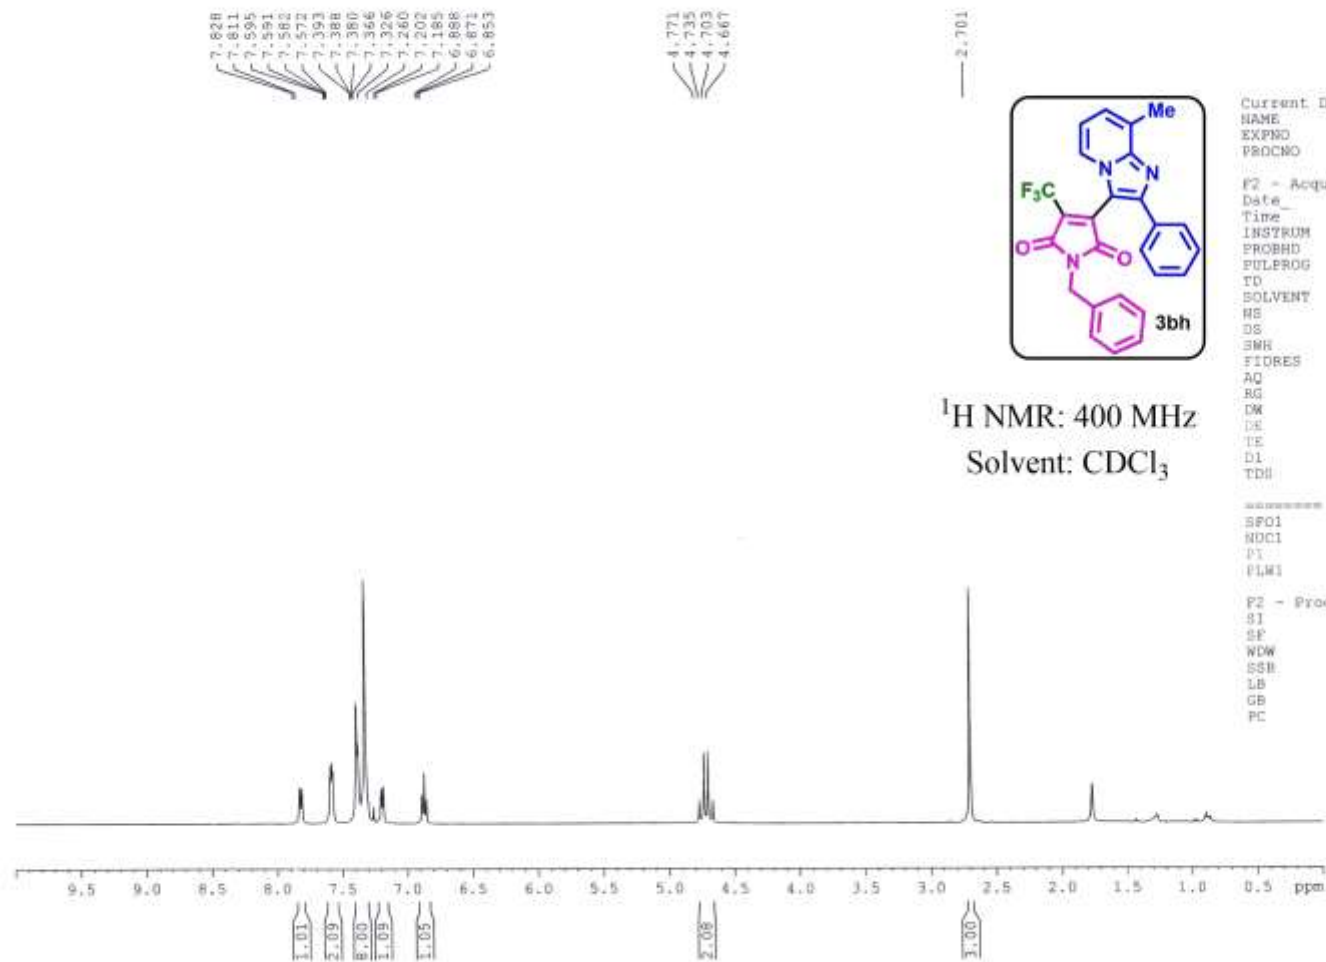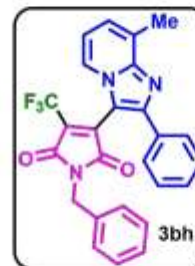

Current Data Parameters  
 NAME Dr. A HAJRA 2022 1H  
 EXPNO 604  
 PROCNO 1

F2 - Acquisition Parameters  
 Date\_ 20220622  
 Time 12.33  
 INSTRUM spect  
 PROBHD 5 mm PABBO BB/  
 PULPROG zg30  
 TD 32768  
 SOLVENT CDCl3  
 NS 8  
 DS 2  
 SFR 8223.685 Hz  
 FIDRES 0.250967 Hz  
 AQ 1.9922944 sec  
 RG 87.66  
 DM 60.800 usec  
 DE 6.50 usec  
 TE 297.5 K  
 D1 1.00000000 sec  
 TDS 1

\*\*\*\*\* CHANNEL f1 \*\*\*\*\*  
 SFO1 400.1524711 MHz  
 NUC1 1H  
 P1 14.75 usec  
 PLW1 12.00000000 W

F2 - Processing parameters  
 SI 16384  
 SF 400.1500091 MHz  
 WDW EM  
 SSB 0  
 LB 0.30 Hz  
 GB 0  
 PC 1.00

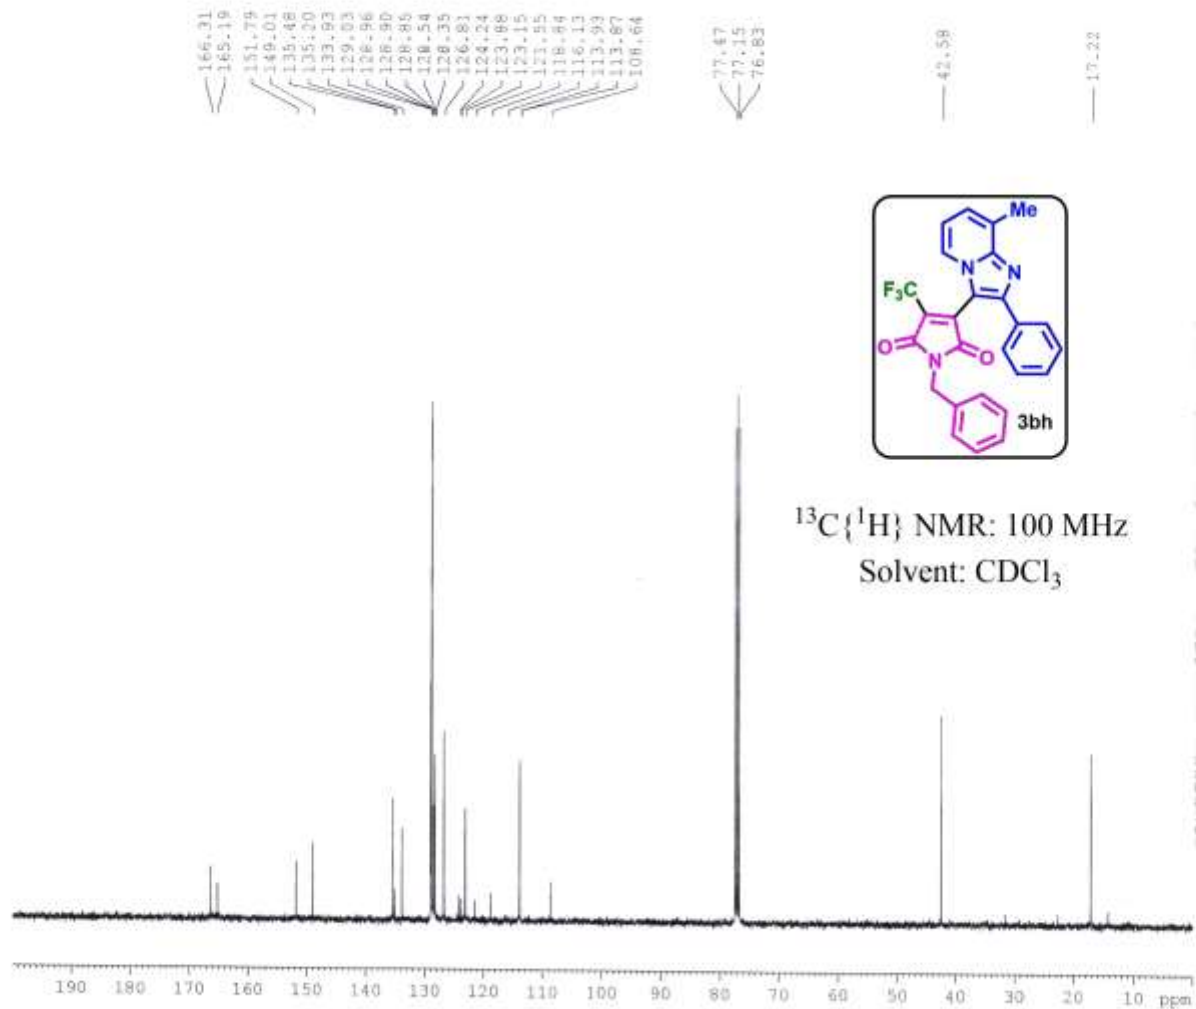

Current Data Parameters  
NAME In. A HAZRD-2023-13C  
EXPNO 240  
PROCNO 1

F2 - Acquisition Parameters  
Date\_ 20230622  
Time 13.12  
INSTRUM spect  
PROBHD 5 mm BBOBO BB7  
PULPROG zgpg30  
TD 32768  
SOLVENT CDCl3  
NS 700  
DS 2  
SWH 14039.441 Hz  
FIDRES 0.733594 Hz  
AQ 0.6815744 sec  
RG 188.42  
DW 20.000 usec  
DE 4.50 usec  
TE 296.1 K  
D1 2.00000000 sec  
D11 0.03000000 sec  
TD0 1

----- CHANNEL f1 -----  
SFO1 100.6218099 MHz  
NUC1 13C  
P1 4.90 usec  
PL1 14.0000000 W

----- CHANNEL f2 -----  
SFO2 400.1514804 MHz  
NUC2 1H  
CPDPRG2 waltz16  
PCPD2 30.00 usec  
PLM2 12.8000000 W  
PLM12 0.3223300 W  
PLM13 0.1421100 W

F2 - Processing parameters  
SI 14384  
SF 100.6177815 MHz  
RG 628  
SFR 0  
LB 1.00 Hz  
GB 0  
PC 1.10

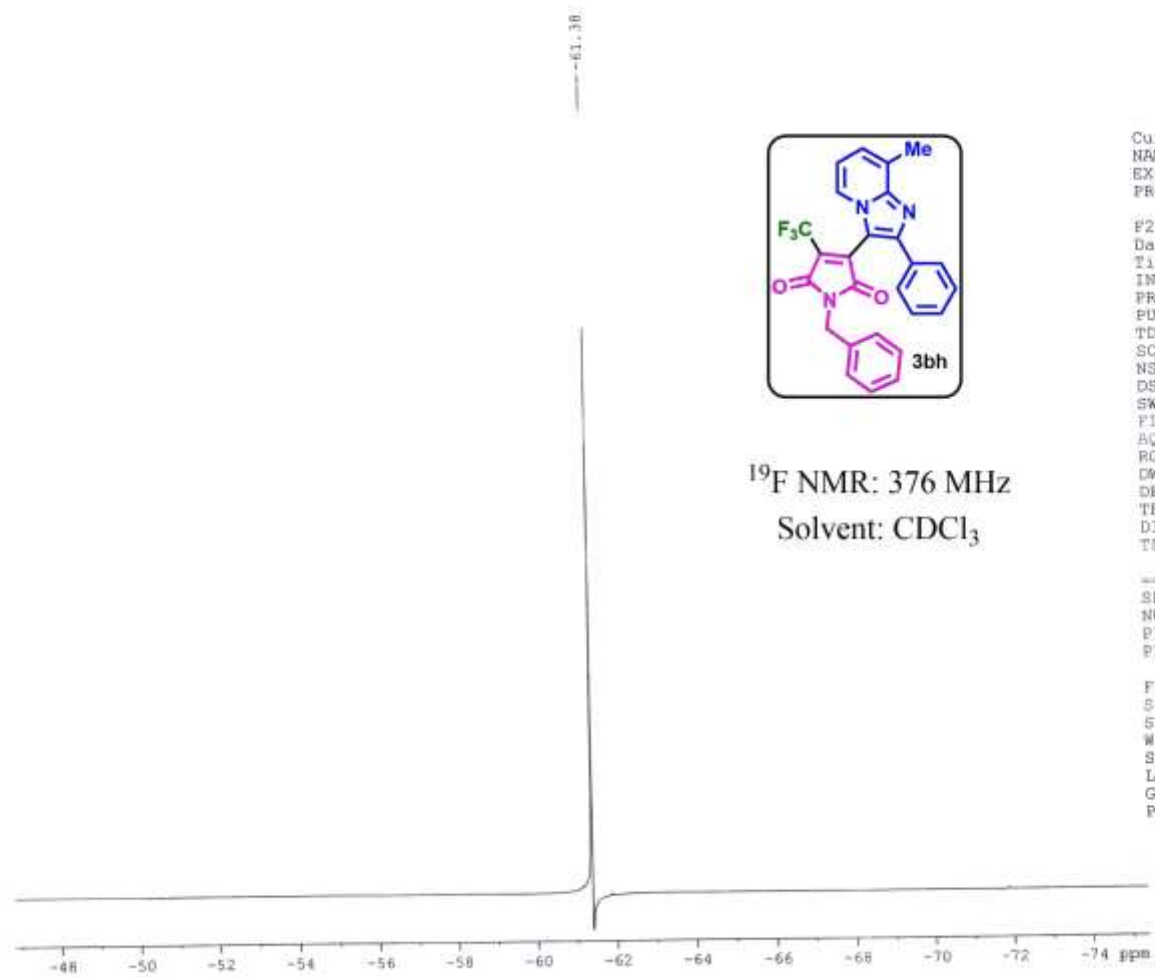

Current Data Parameters  
 NAME Dr. A HAJRA 2022 1H  
 EXPNO 605  
 PROCNO 1

F2 - Acquisition Parameters  
 Date 20220622  
 Time 12.37  
 INSTRUM spect  
 PROBRD 5 mm PARBO BB/  
 PULPROG zgpg30  
 TD 32768  
 SOLVENT CDCl3  
 NS 8  
 DS 2  
 SWH 89285.711 Hz  
 FIDRES 2.724784 Hz  
 AQ 0.1835008 sec  
 RG 186.42  
 DW 5.600 usec  
 DE 6.50 usec  
 TE 297.5 K  
 D1 1.00000000 sec  
 TDO 1

----- CHANNEL f1 -----  
 SFO1 376.4795333 MHz  
 NUCL1 19F  
 P1 12.50 usec  
 PLW1 20.00000000 W

F2 - Processing parameters  
 SI 16384  
 SF 376.5171850 MHz  
 WDW EM  
 SSB 0  
 LB 0.30 Hz  
 GB 0  
 PC 1.00
